# Supplementary material for: Pan-cancer analysis reveals TAp63-regulated oncogenic lncRNAs that promote cancer progression through AKT activation
Source: PubMed Central journal article supplement (PMC7561725; doi:10.1038/s41467-020-18973-w), 2020-10-14
Supplement: 41467_2020_18973_MOESM1_ESM.pdf [file 41467_2020_18973_MOESM1_ESM.pdf]

## **SUPPLEMENTARY INFORMATION**

**Pan-cancer analysis reveals TAp63-regulated lncRNAs (TROLLs) that promote cancer progression through AKT activation**

Napoli M., et al.

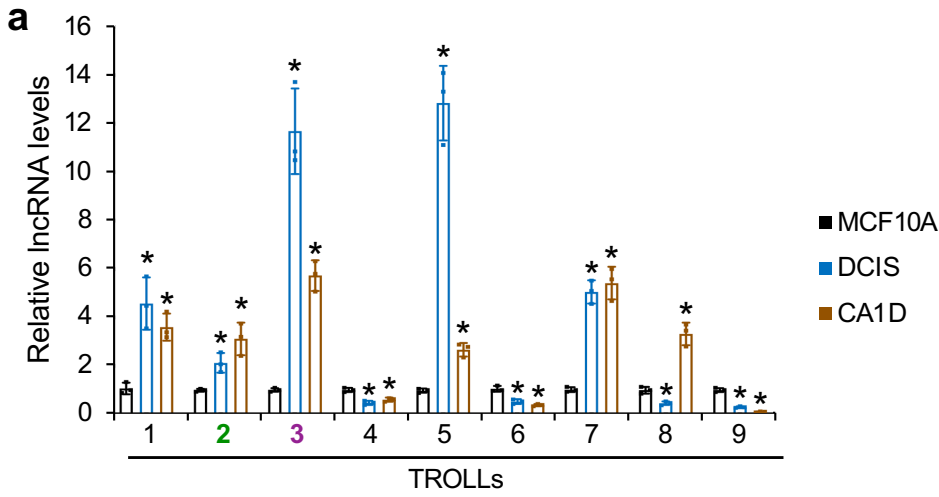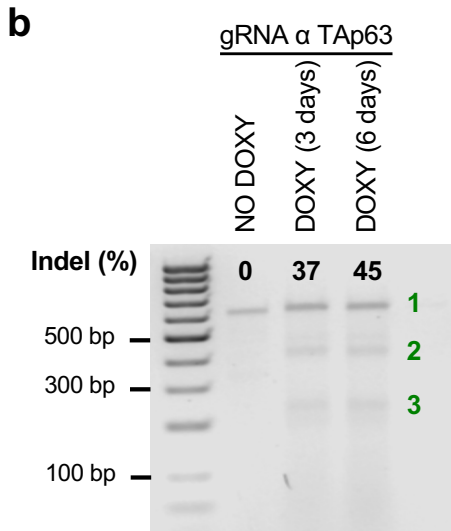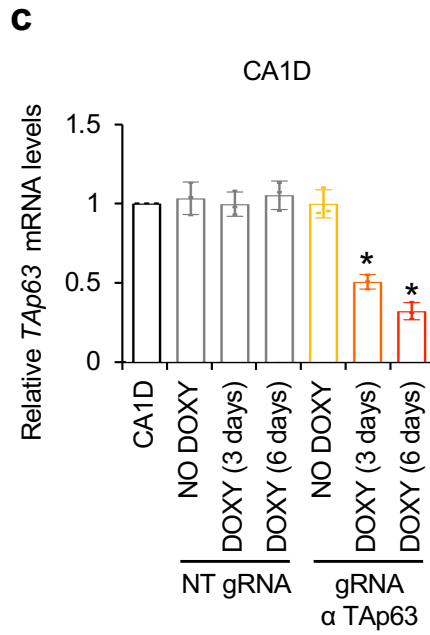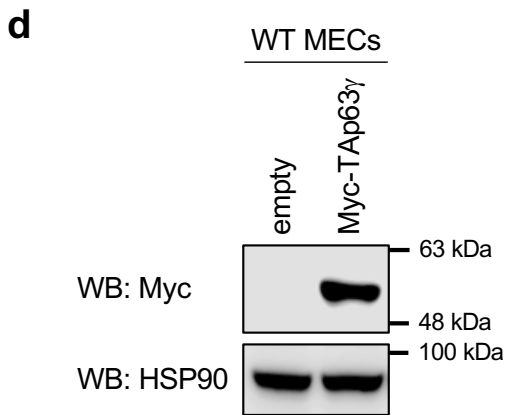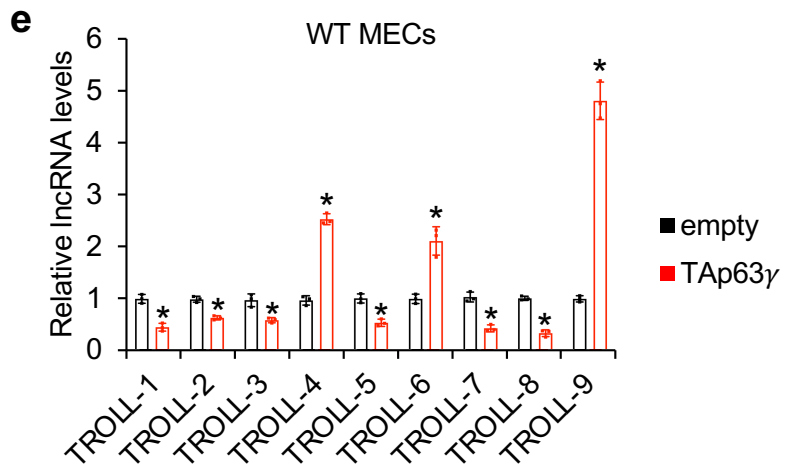

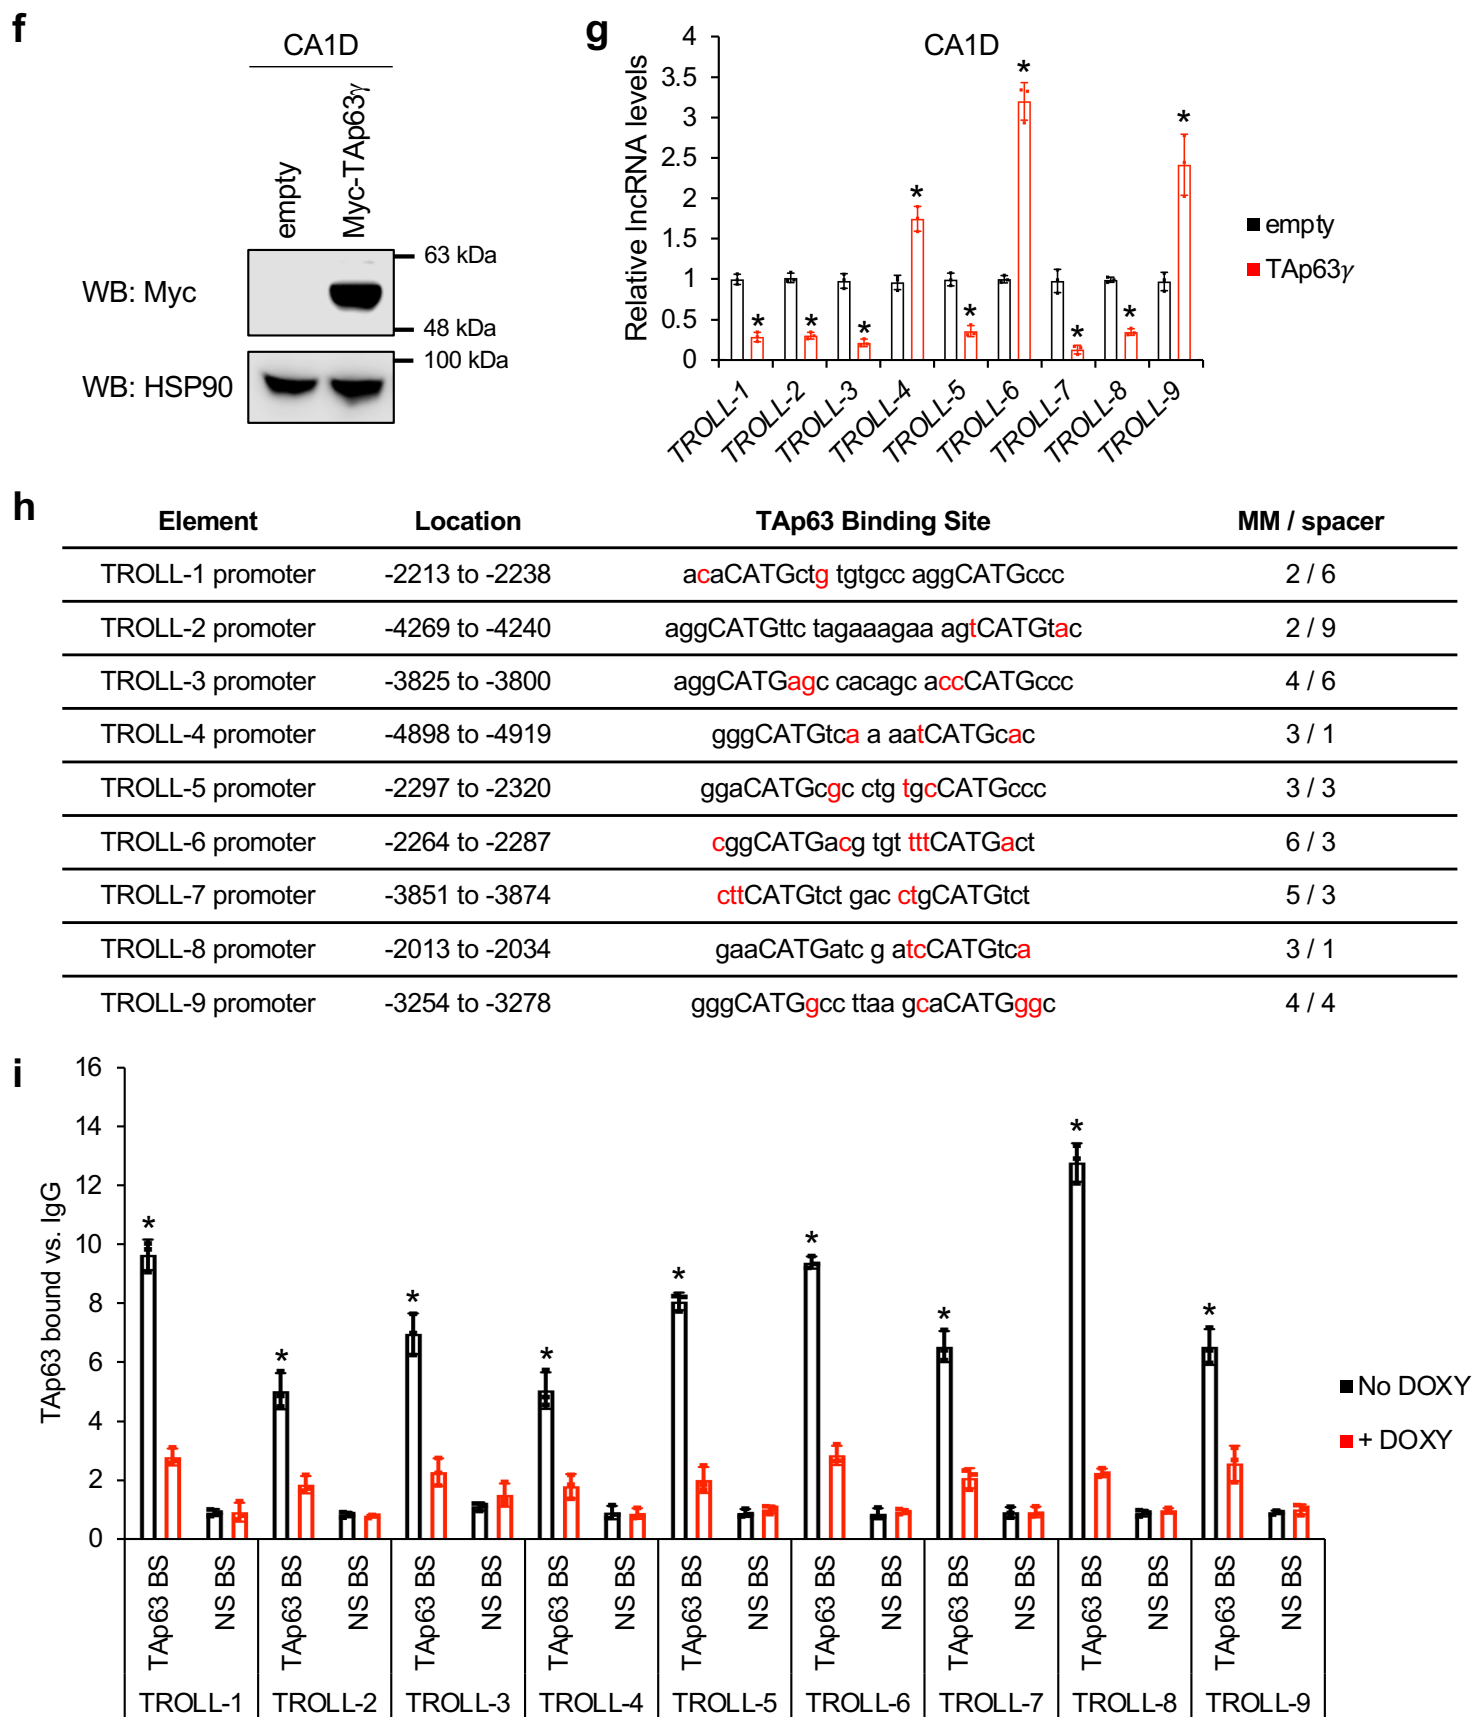

**Supplementary Fig. 1** TAp63 regulates lncRNAs in breast cancer progression. **a** qRT-PCR of the 9 conserved lncRNAs differentially expressed in the MCF10A human breast cancer progression model. **b** Frequency of insertions/deletions occurring in the TAp63 locus in CA1D cells infected with TAp63 targeting gRNA. **c** qRT-PCR for TAp63 in CA1D cells treated as in (b). **d** Representative western blot of Myc-tag TAp63 $\gamma$  in WT Mammary Epithelial Cells (MECs) transfected with either pcDNA3 Myc-TAp63 $\gamma$  or pcDNA3, as a negative control. **e** qRT-PCR of the indicated lncRNAs in the same cells treated as in (d). **f** Representative WB of Myc-tag TAp63 $\gamma$  in CA1D cells transfected with either pcDNA3 Myc-TAp63 $\gamma$  or pcDNA3, as a negative control. **g** qRT-PCR of the indicated lncRNAs in the same cells treated as in (f). **h** Table listing the TAp63 binding sites on the promoters of the indicated lncRNAs. Number of mismatches to the TAp63 consensus binding site are shown in red text. MM indicates the number of mismatches to the TAp63 consensus binding site. Spacer indicates the number of nucleotides between two half sites. **i** qRT-PCR of TAp63 ChIP assays on the promoters of the indicated lncRNAs. CA1D cells infected with TAp63 targeting gRNA were either left untreated (No doxy) or treated with doxycycline (+ doxy). Graphs represent the individual data points, mean  $\pm$  SD of 3 independent experiments. P value (\* $p$  < 0.05) was calculated by two-tailed unpaired Student's t-test. Gels and blots are representative of  $n = 3$  biological replicates. Source data are provided as Source data file.

Breast cancer progression TMA – Biomax

TROLL-2 vs. TROLL-3

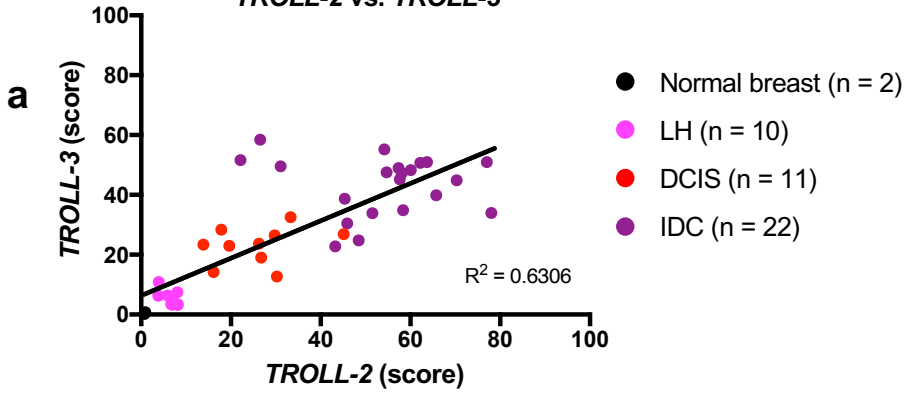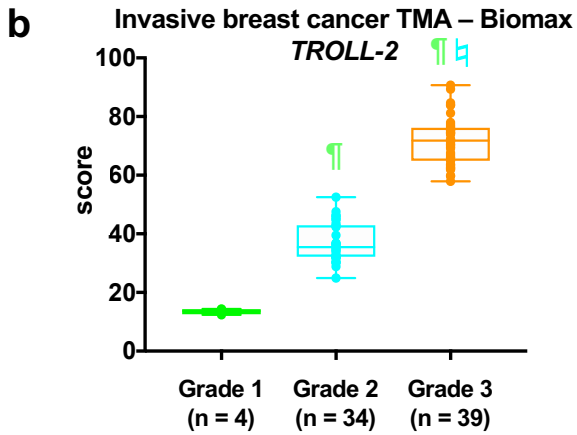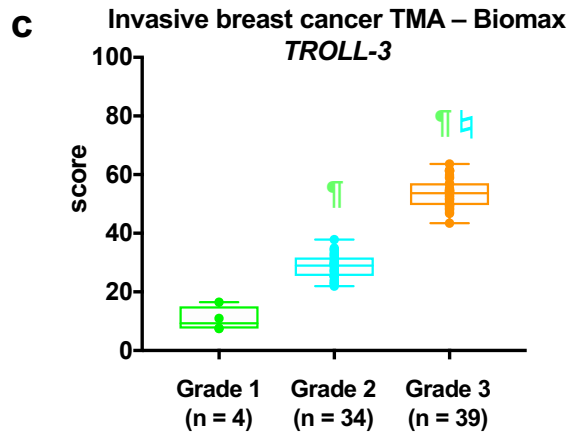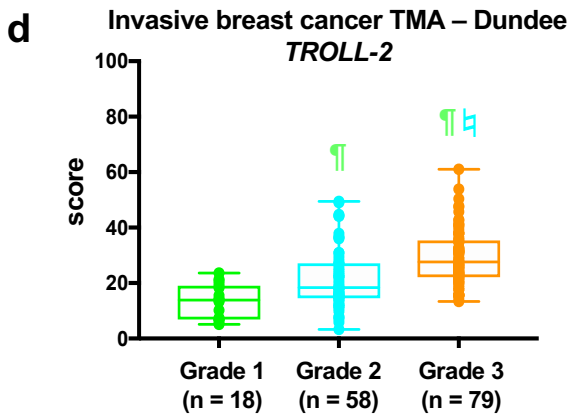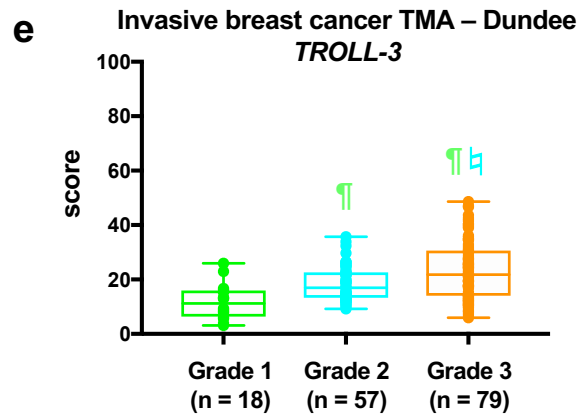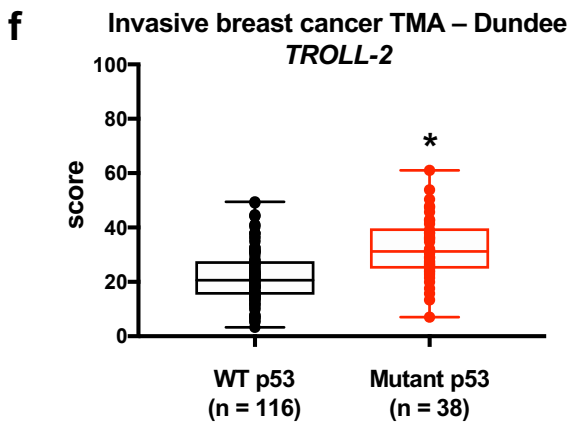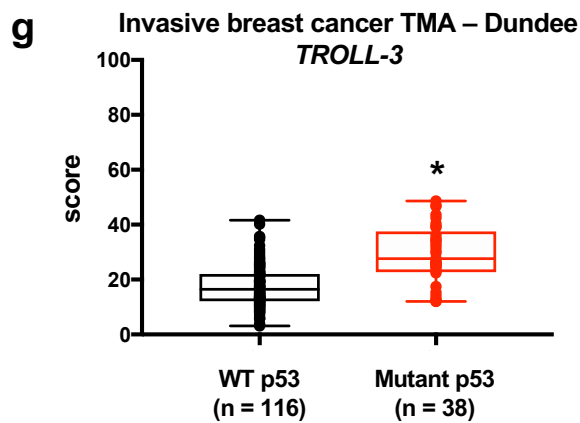

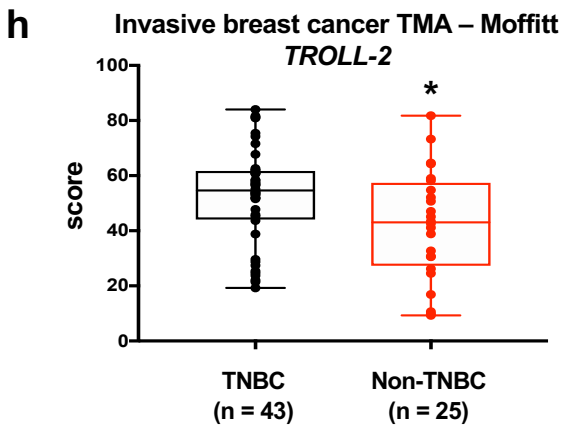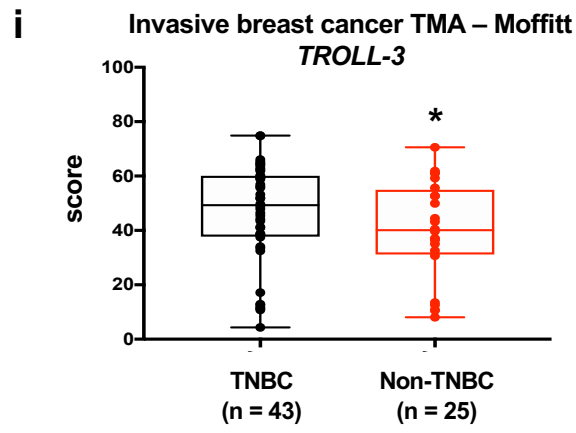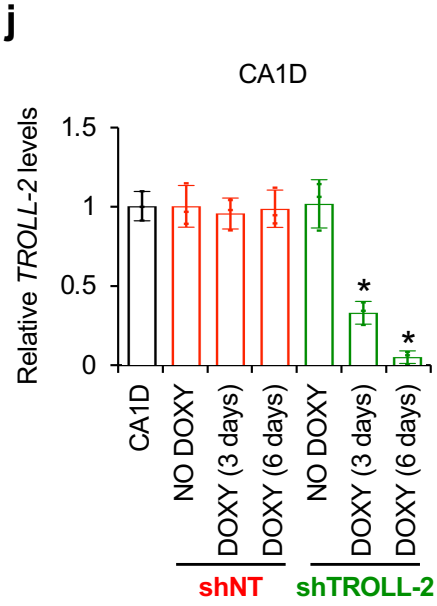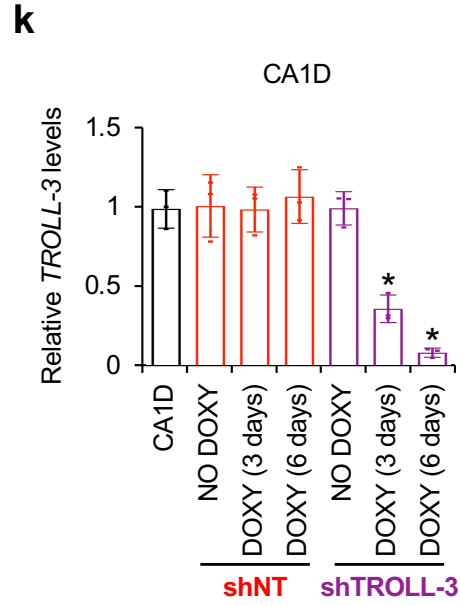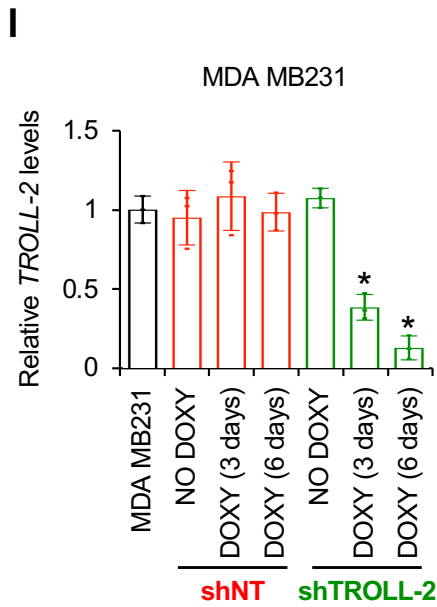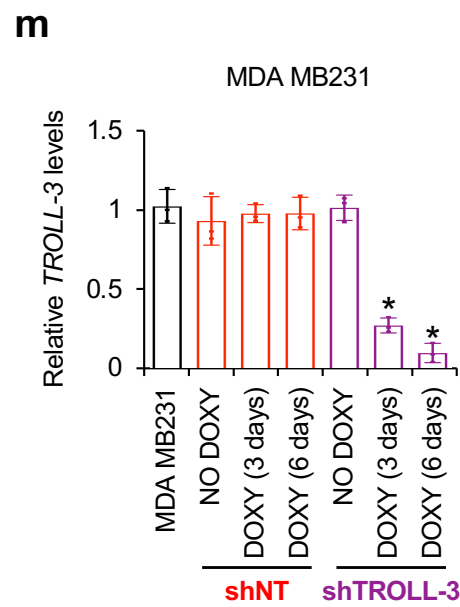

**n** Fat Pad Injections of MB231 cells – Mammary Adenocarcinomas

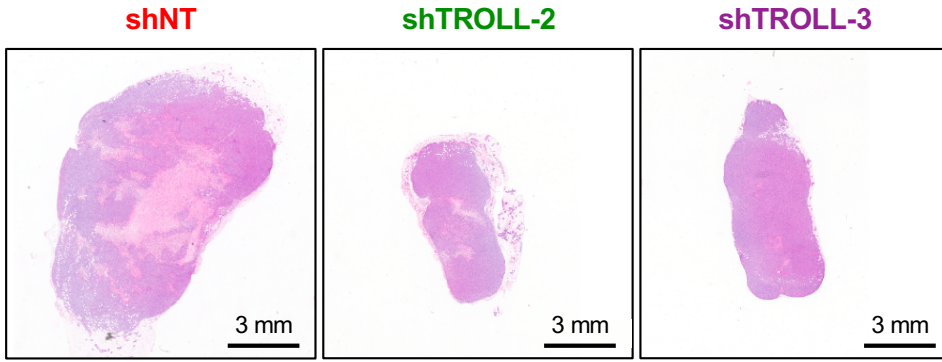

**o**

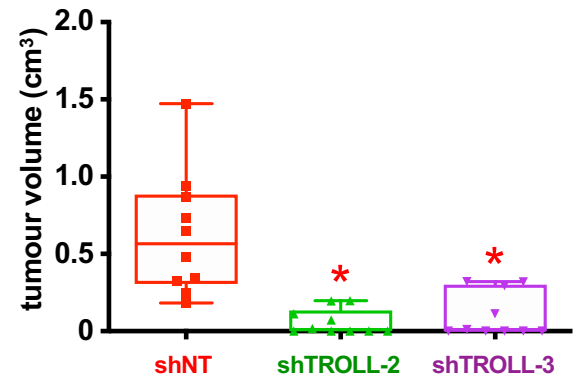

**p** Tail Vein Injections of MB231 cells – Lung Colonization

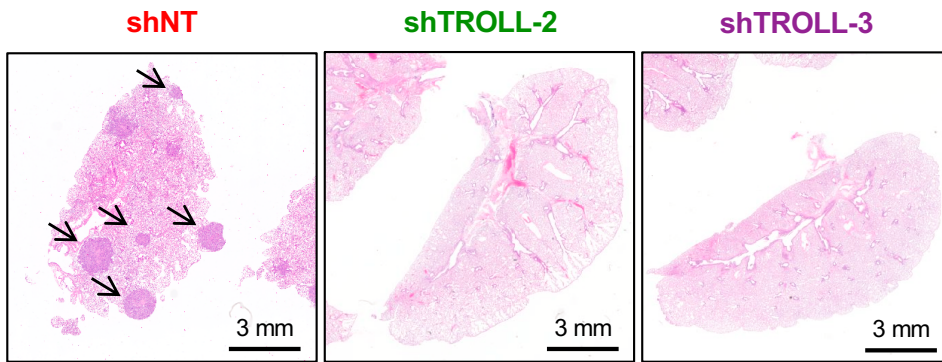

**q**

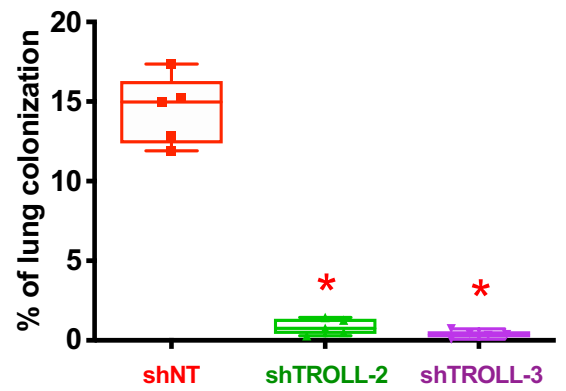

**r**

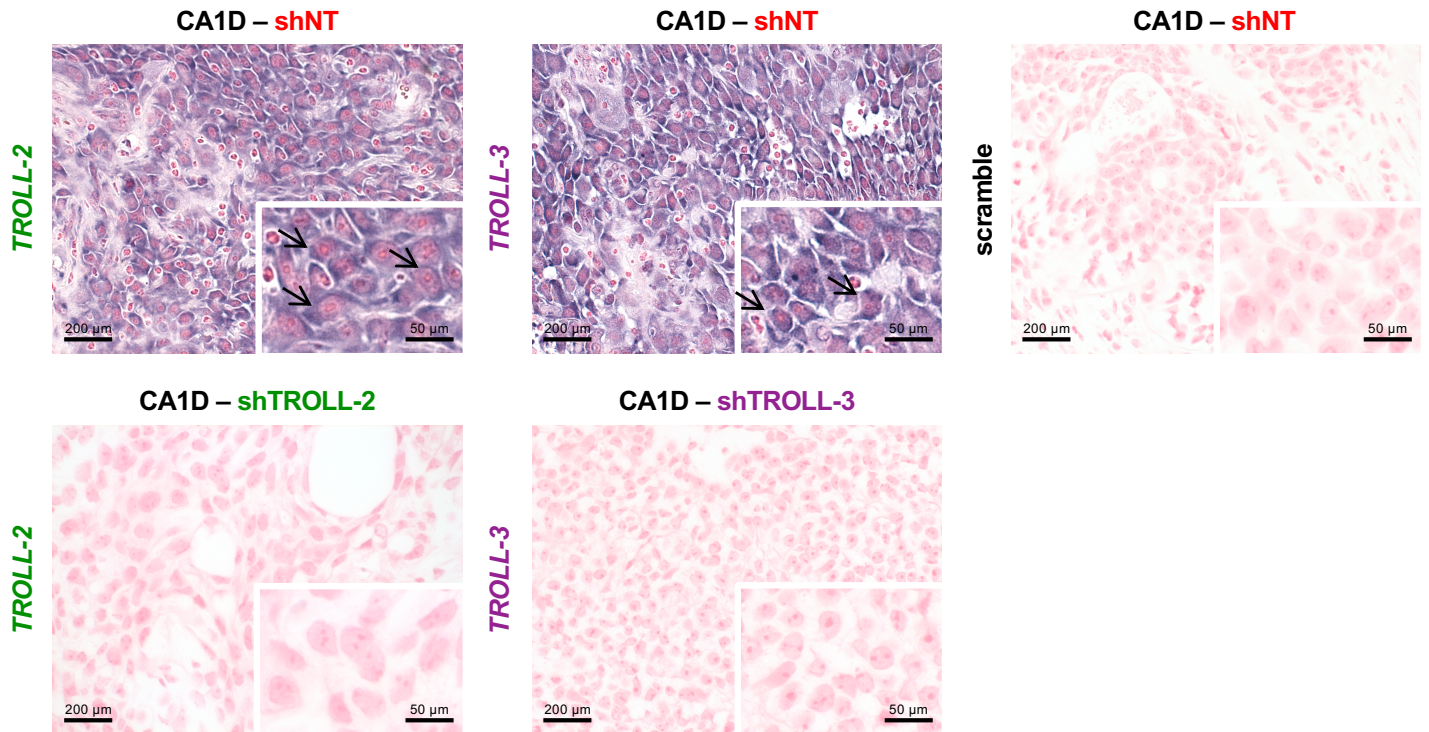

**S**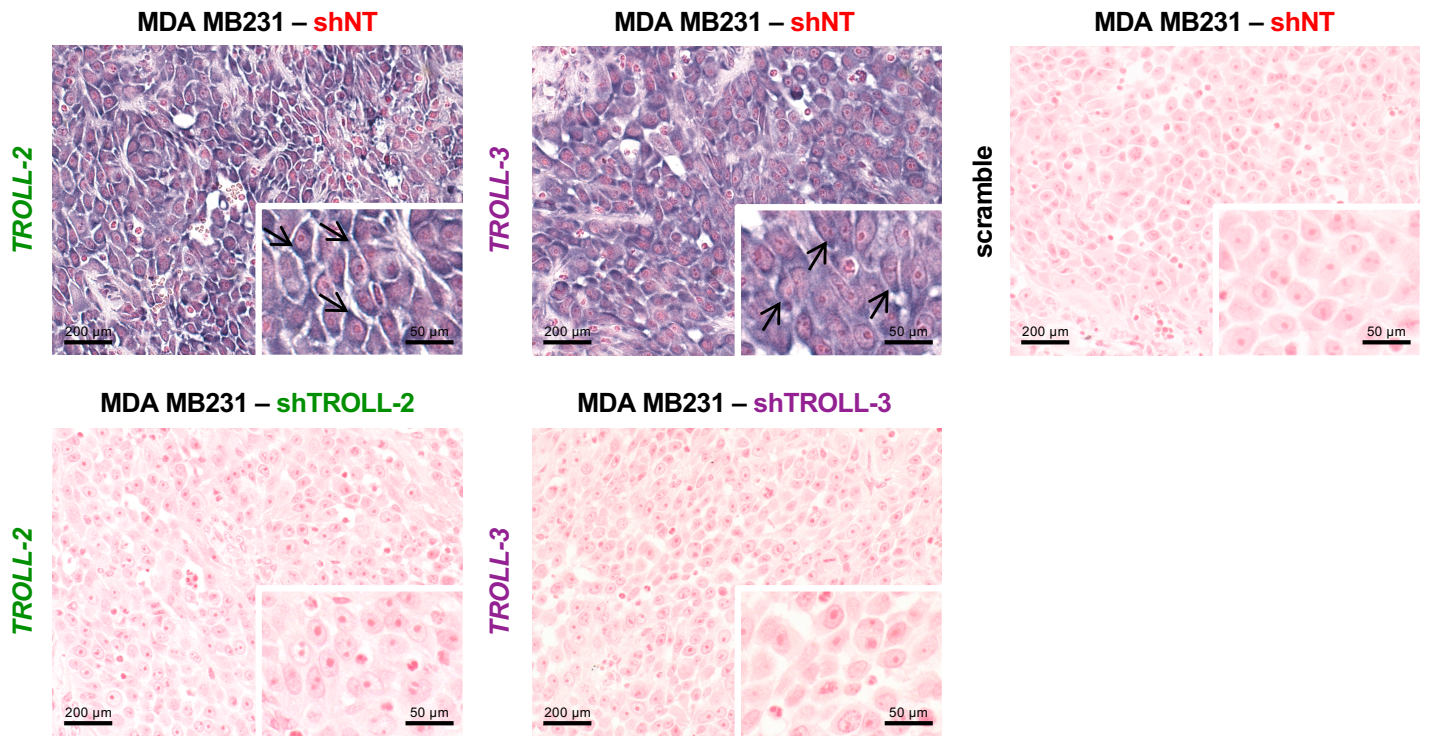

**Supplementary Fig. 2** *TROLL-2* and *TROLL-3* are markers of breast cancer progression. **a** Correlation of the ISH scores of *TROLL-2* and *TROLL-3* shown in Fig. 2a,b. **b-e** Correlation of the ISH scores of *TROLL-2* and *TROLL-3* with tumour grade in the indicated TMAs. Data were analysed with two-way ANOVA. ¶ vs. grade 1,  $P < 0.005$ . † vs. grade 2,  $P < 0.005$ . **f,g** Correlation of the ISH scores of *TROLL-2* (**f**) and *TROLL-3* (**g**) with *TP53* status in the indicated TMA. \* vs. WT p53,  $P < 0.005$ , Welch's Student's *t* test. **h,i** Correlation of the ISH scores of *TROLL-2* (**h**) and *TROLL-3* (**i**) with TNBC vs. non-TNBC cases in the indicated TMA. \* vs. TNBC,  $P < 0.005$ , Welch's *t* test. **j-m** qRT-PCR for *TROLL-2* and *TROLL-3* in either CA1D (**j,k**) or MDA MB-231 cells (**l,m**) infected with the indicated shRNAs. \* vs. shNT no doxy,  $P < 0.005$ , two-tailed Student's *t* test. **n** Representative H&E stained cross sections of mammary adenocarcinomas derived from MDA MB-231 cells infected with the indicated shRNAs. **o** Tumour volume quantification of the tumours described in (**n**).  $n = 10$  tumours, \* vs. shNT,  $P < 0.005$ , two-tailed Student's *t* test. **p** Representative H&E stained cross sections of lung colonies derived from MDA MB-231 cells infected with the indicated shRNAs. **q** Quantification of the lung colonies described in (**p**).  $n = 5$  mice for all groups, \* vs. NT,  $P < 0.005$ , two-tailed Student's *t* test. **r,s** Representative images of ISH for *TROLL-2* (left panels) and *TROLL-3* (middle panels) in tumours derived from CA1D (**r**) or MDA MB-231 (**s**) cells. Micrographs are representative of  $n = 10$  tumours. Graphs represent the individual data points, mean  $\pm$  SD of 3 independent experiments. All boxplots represent the individual data points, median and whiskers (min to max method). Source data are provided as Source data file.

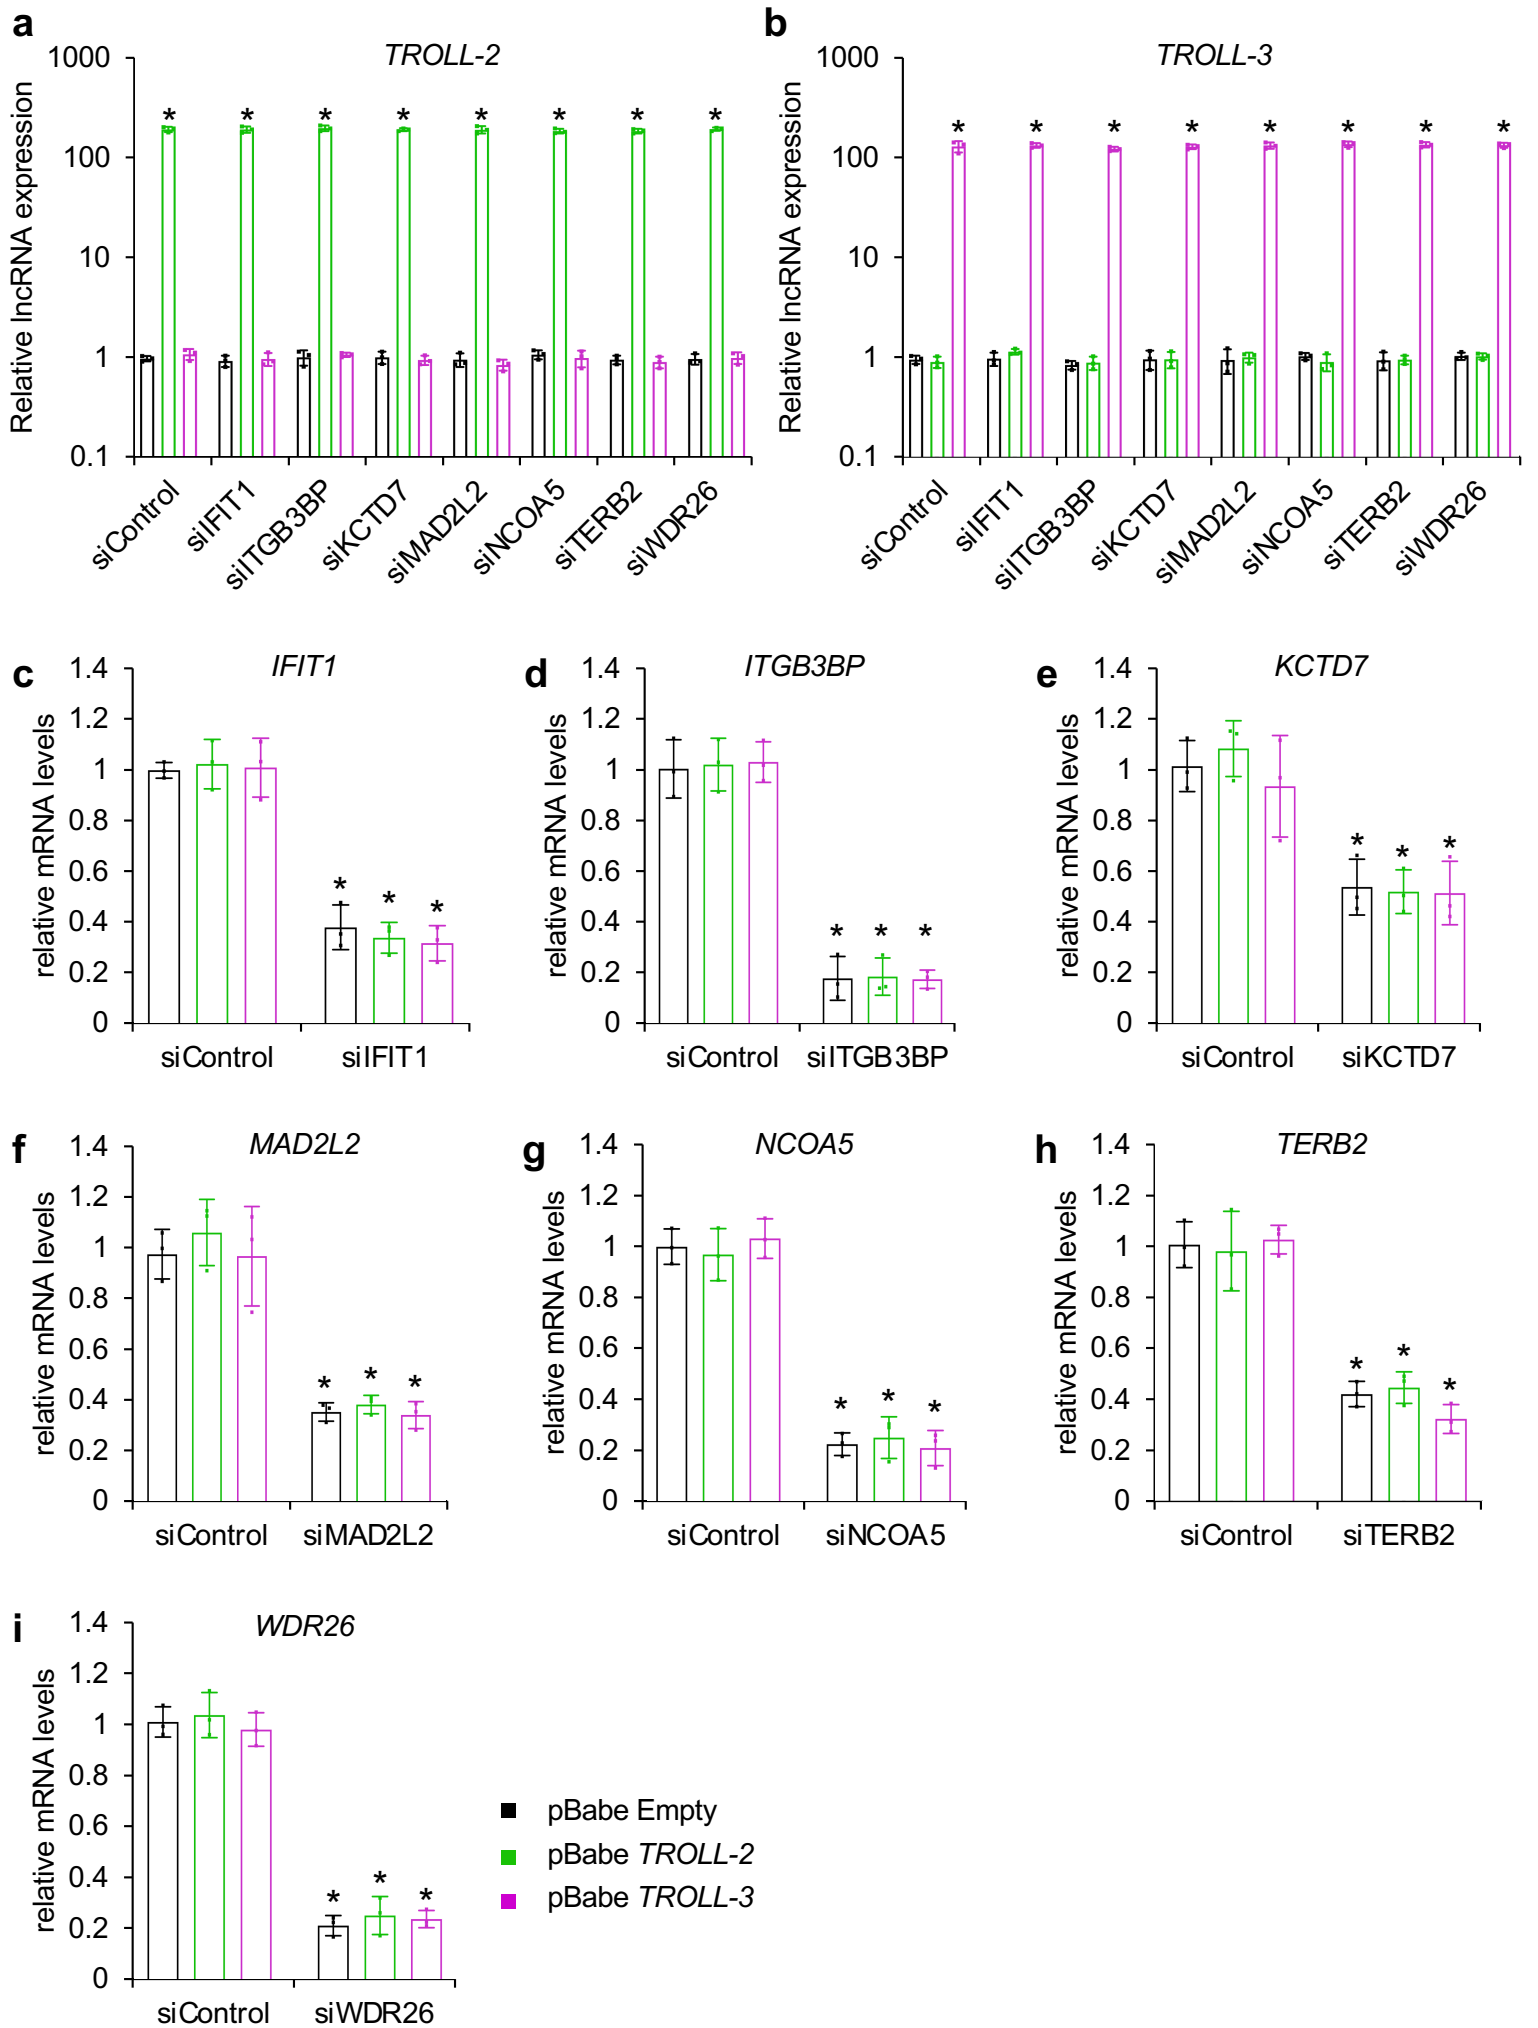



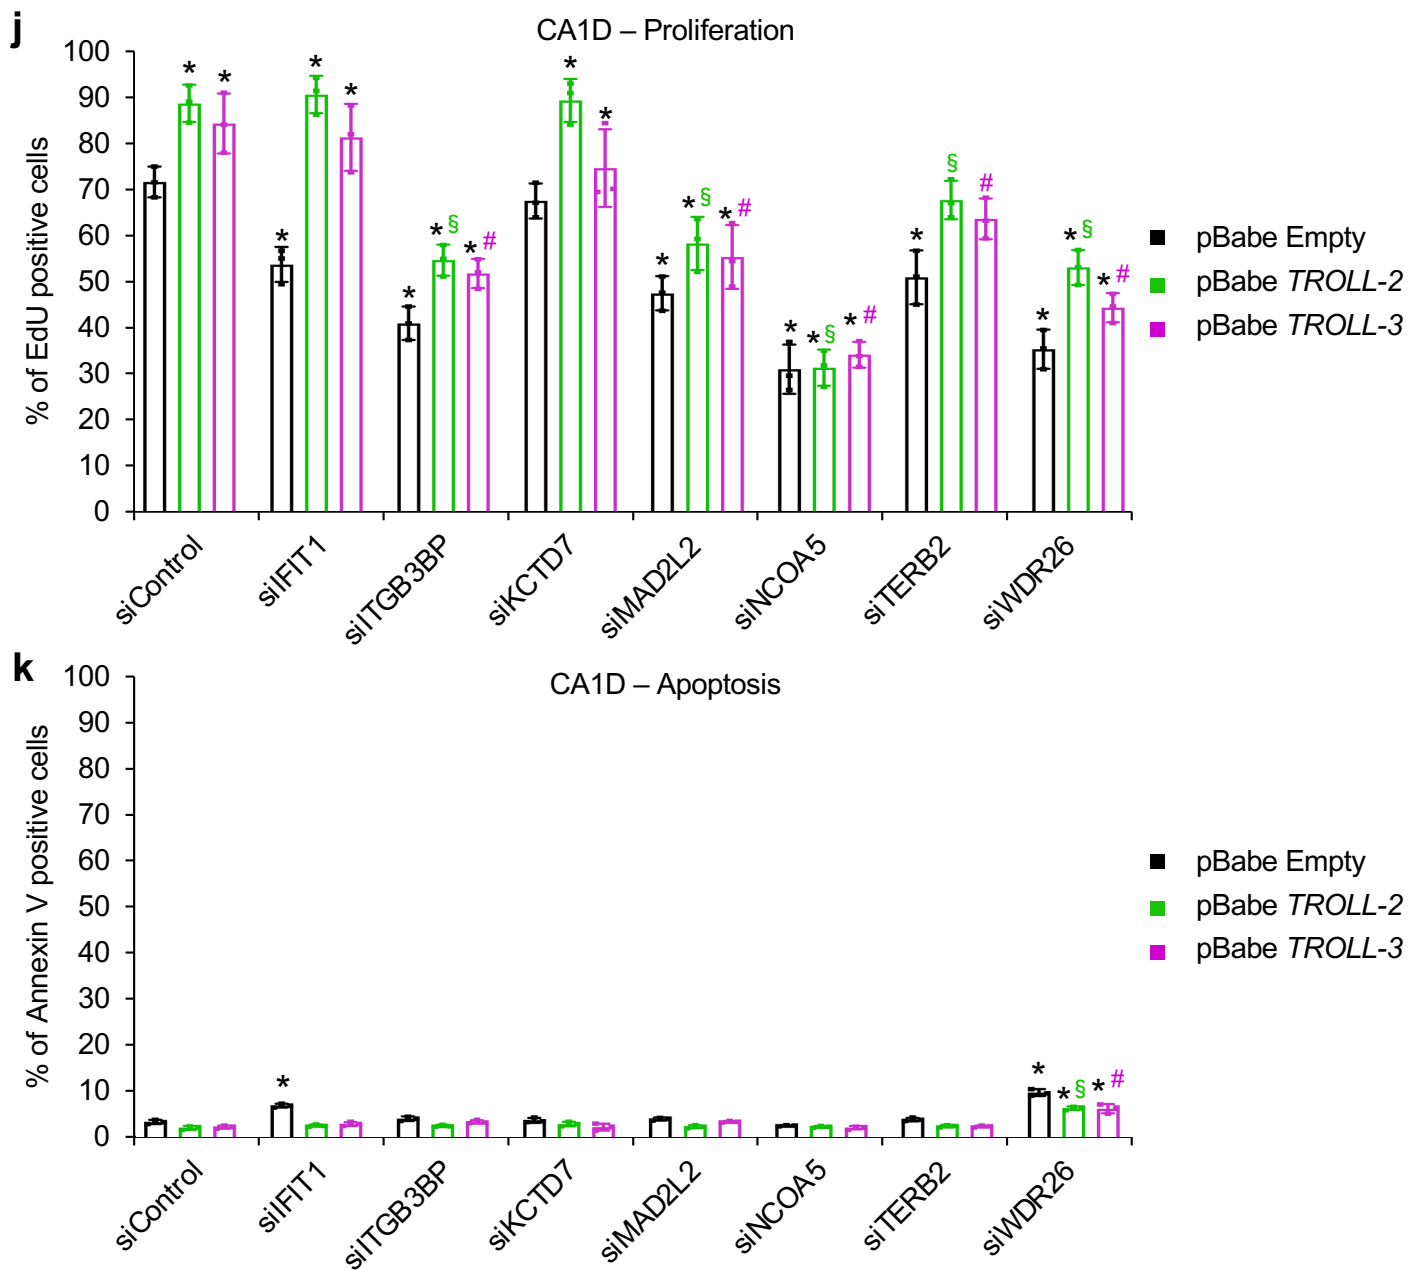

**Supplementary Fig. 3** *TROLL-2* and *TROLL-3* promote cancer progression via *WDR26*. **a-i** qRT-PCR for *TROLL-2* (**a**), *TROLL-3* (**b**), *IFIT1* (**c**), *ITGB3BP* (**d**), *KCTD7* (**e**), *MAD2L2* (**f**), *NCOA5* (**g**), *TERB2* (**h**), and *WDR26* (**i**) in CA1D cells overexpressing either *TROLL-2*, *TROLL-3*, or the empty vector as a negative control, and transfected with the indicated siRNAs. Graphs represent the individual data points, mean  $\pm$  SD and analysed with two-tailed Student's *t* test,  $n = 3$  biological replicates, \* vs. pBabe Empty siControl,  $P < 0.005$ . **j,k** Quantification for EdU (**j**) and annexin V (**k**) of CA1D cells treated as in **a-i**. Graphs represent the individual data points, mean  $\pm$  SD and analysed with two-tailed Student's *t* test,  $n = 3$  biological replicates, \* vs. pBabe Empty siControl,  $P < 0.005$ . § vs. pBabe *TROLL-2* siControl,  $P < 0.005$ . # vs. pBabe *TROLL-3* siControl,  $P < 0.005$ . Source data are provided as Source data file.

**a** Breast cancer progression TMA – Biomax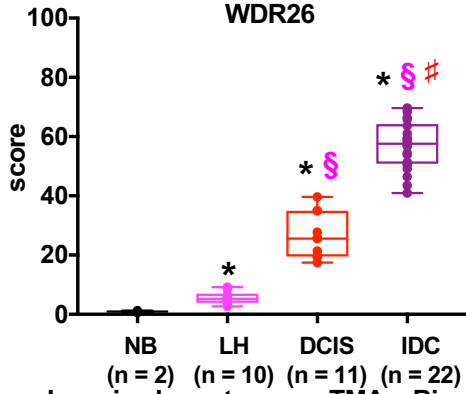**b** Breast cancer progression TMA – Biomax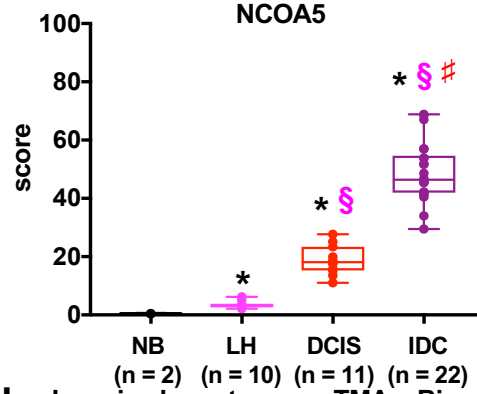**c** Invasive breast cancer TMA – Biomax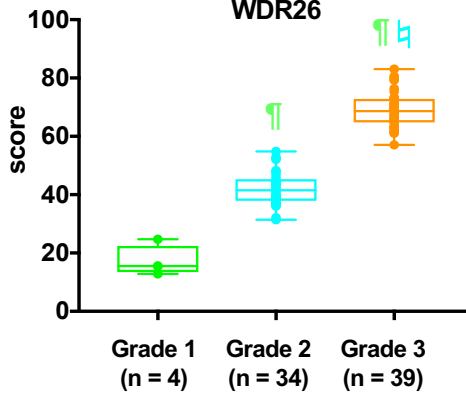**d** Invasive breast cancer TMA – Biomax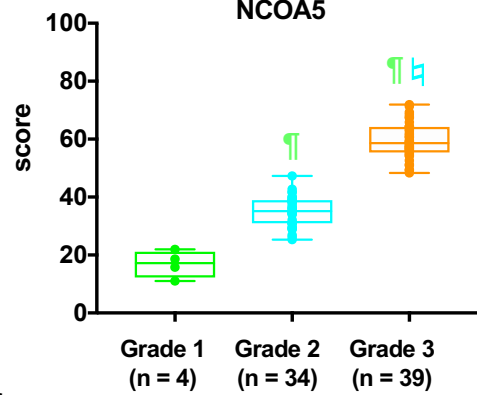**e** Breast cancer progression TMA – Biomax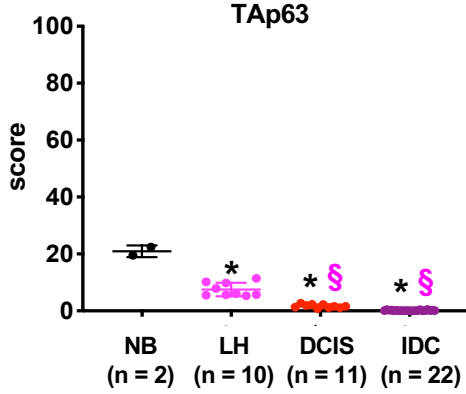**f** Breast cancer progression TMA – Biomax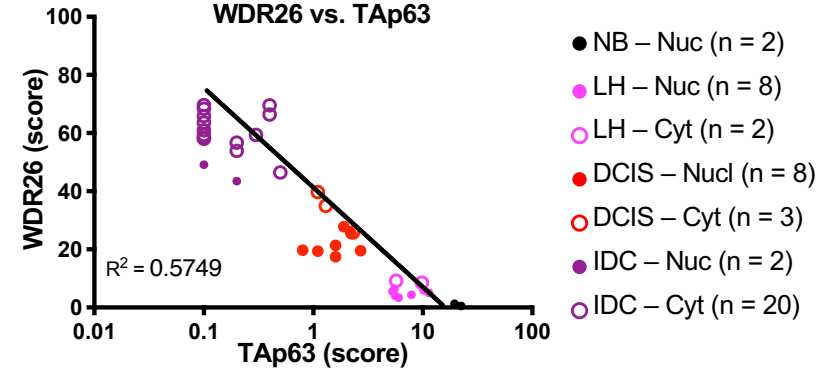**g** Overall survival in TCGA basal-like breast cancer with high levels of *TROLL-3*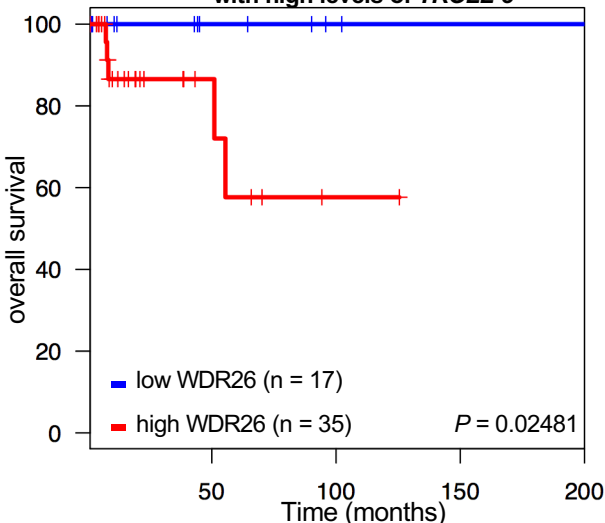**h** Overall survival in TCGA basal-like breast cancer with low levels of *TROLL-3*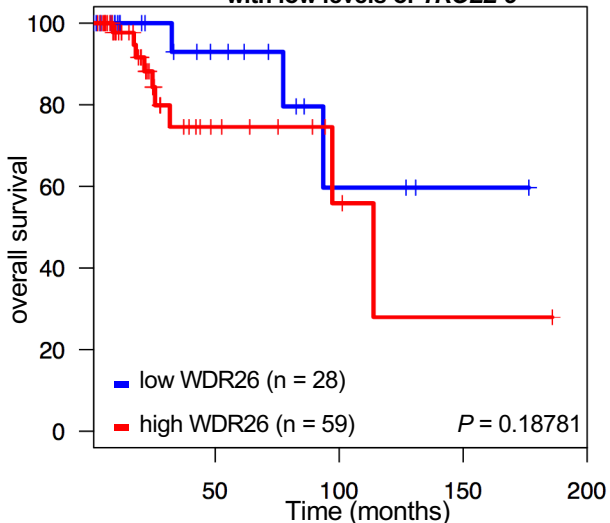

**Supplementary Fig. 4** WDR26 localization correlates with breast cancer progression. **a,b** Quantification of the IHC scores of WDR26 (**a**) and NCOA5 (**b**) in the indicated TMAs. **c,d** Quantification of the IHC scores of WDR26 (**c**) and NCOA5 (**d**) in the indicated TMAs. **e** Quantification of the IHC scores of TAp63 in the indicated TMA. **f** Correlation of the IHC score and cellular distribution of WDR26 with the IHC score of TAp63 in the same TMA as in (**e**). **g,h** Kaplan-Meier curves of overall TCGA breast cancer survival based on the levels of *TROLL-3*. COXPH *P* values are shown. In **a-e**, boxplots represent the individual data points, median and whiskers (min to max method). Data were analysed with two-way ANOVA. \* vs. normal breast tissue, § vs. lobular hyperplasia, # vs. ductal carcinoma in situ, ¶ vs. grade 1, † vs. grade 2,  $P < 0.005$ . Source data are provided as Source data file.

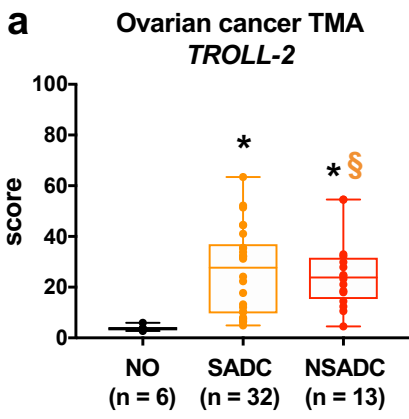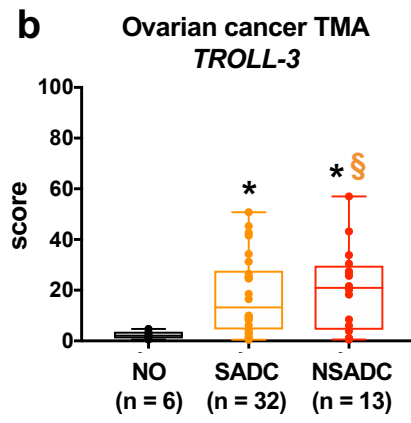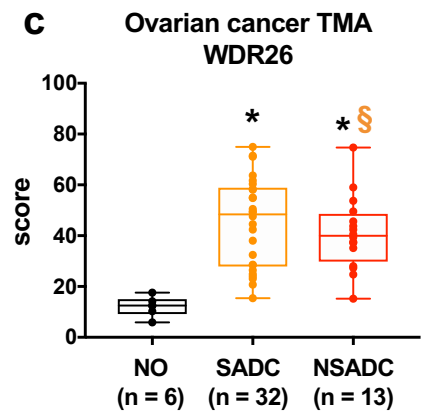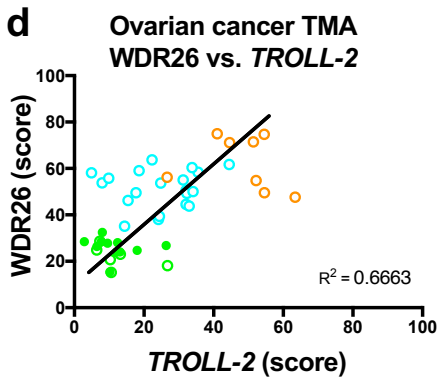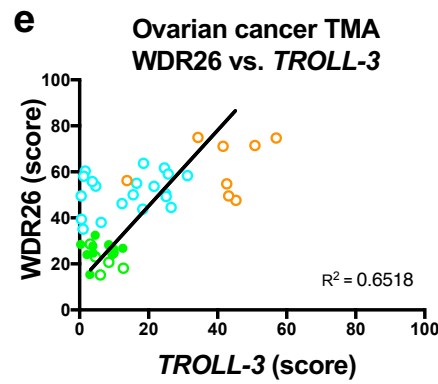

- Grade 1 – Nuclear (n = 11)
- Grade 1 – Cytoplasmic (n = 6)
- Grade 2 – Cytoplasmic (n = 20)
- Grade 3 – Cytoplasmic (n = 8)

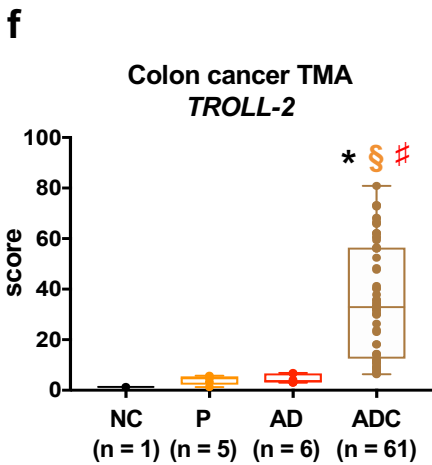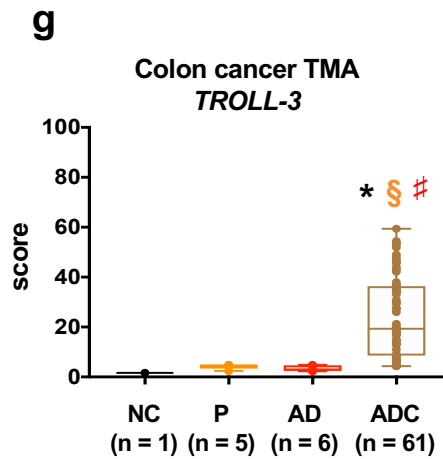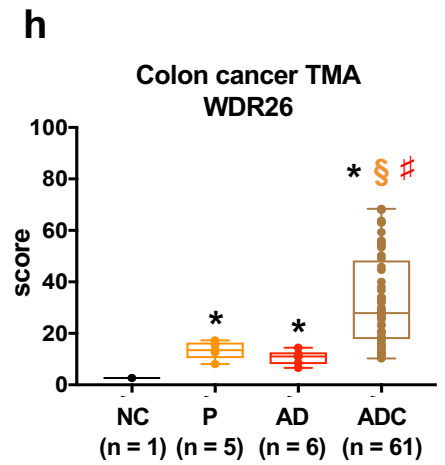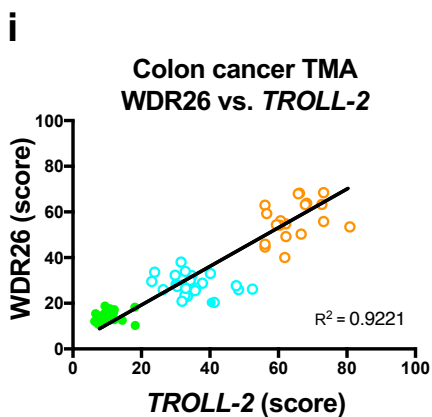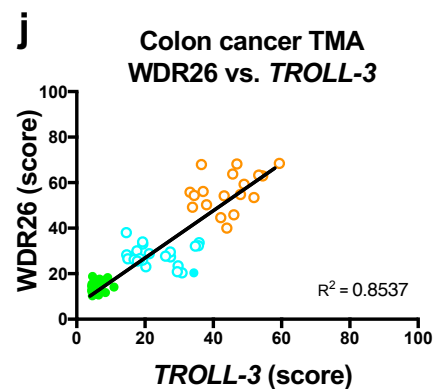

- Grade 1 – Nuclear (n = 18)
- Grade 2 – Nuclear (n = 1)
- Grade 2 – Cytoplasmic (n = 23)
- Grade 3 – Cytoplasmic (n = 19)

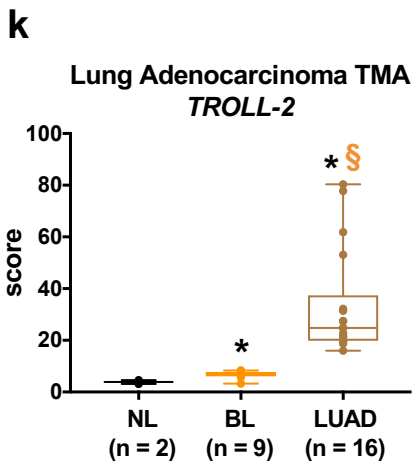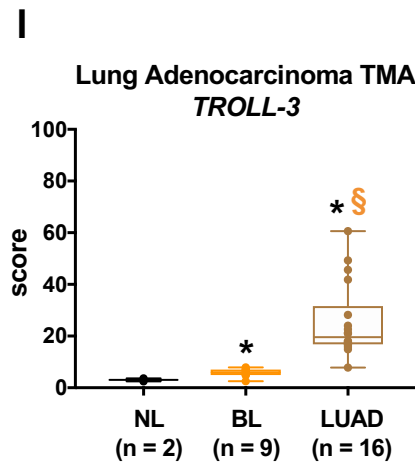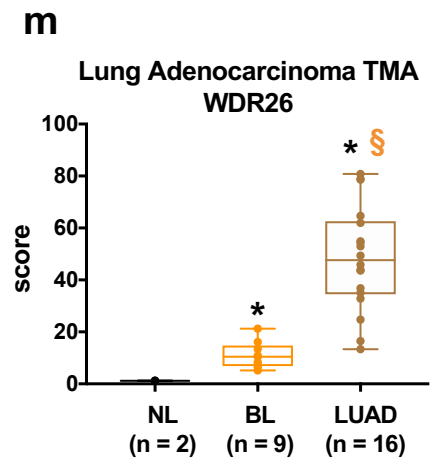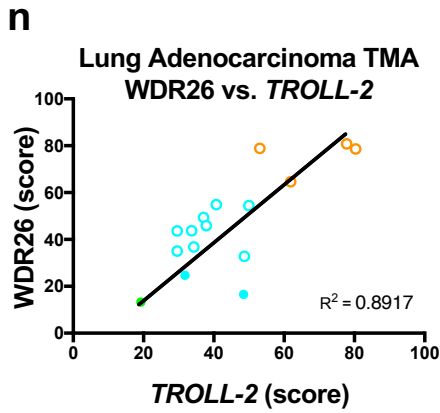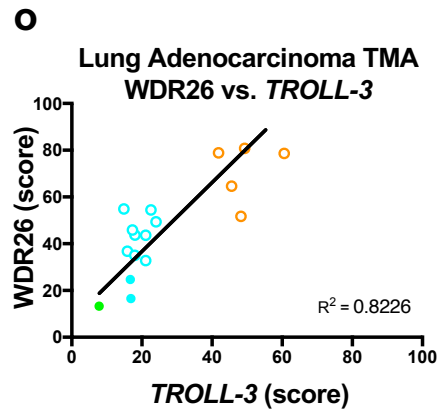

- Grade 1 – Nuclear (n = 1)
- Grade 2 – Nuclear (n = 2)
- Grade 2 – Cytoplasmic (n = 9)
- Grade 3 – Cytoplasmic (n = 4)

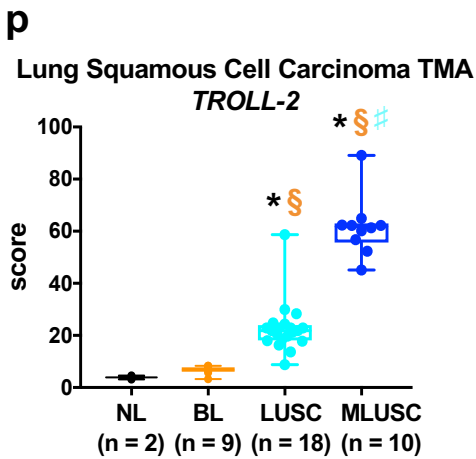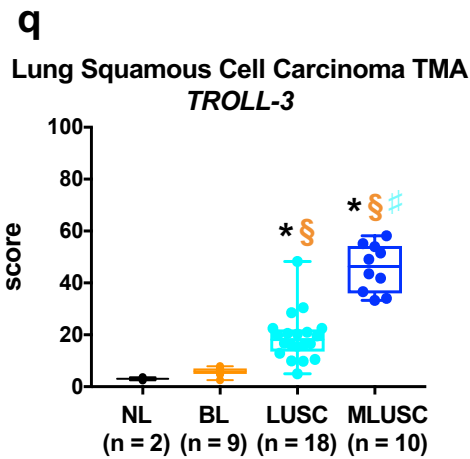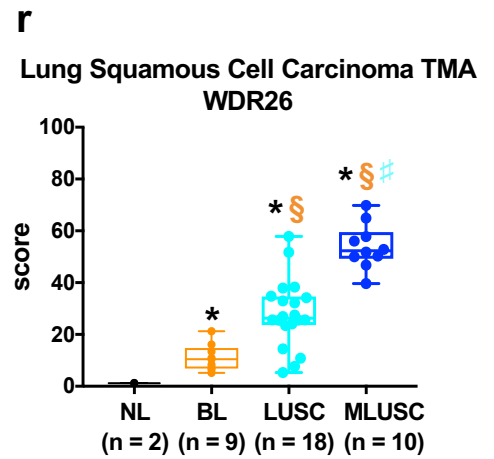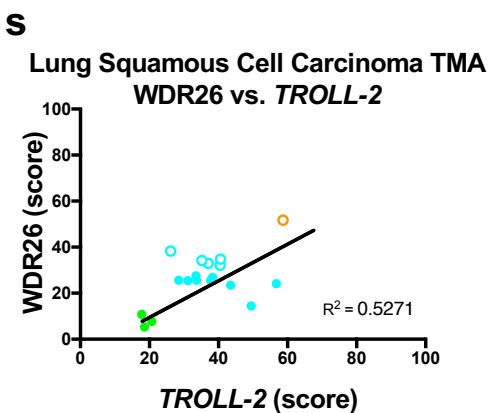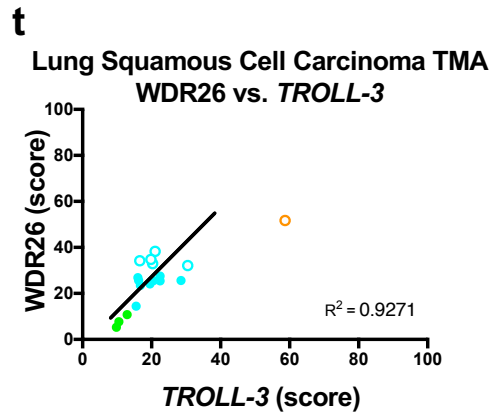

- Grade 1 – Nuclear (n = 3)
- Grade 2 – Nuclear (n = 9)
- Grade 2 – Cytoplasmic (n = 5)
- Grade 3 – Cytoplasmic (n = 1)

**u**

Melanoma TMA – Biomax  
*TROLL-2*

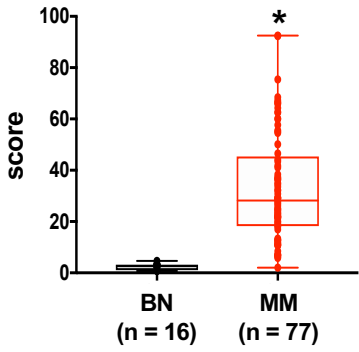**v**

Melanoma TMA – Biomax  
*TROLL-3*

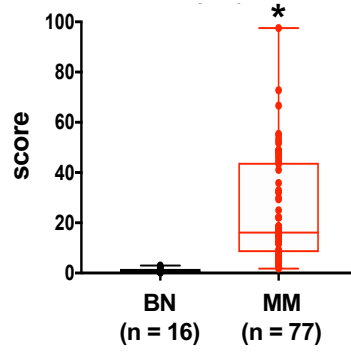**w**

Melanoma TMA – Biomax  
WDR26

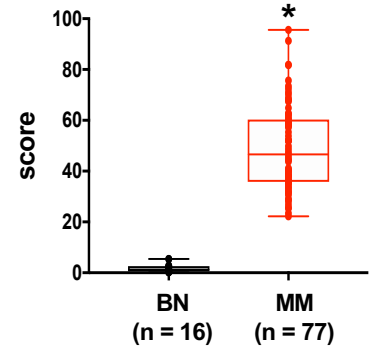**y**

Melanoma TMA – Biomax  
WDR26 vs. *TROLL-2*

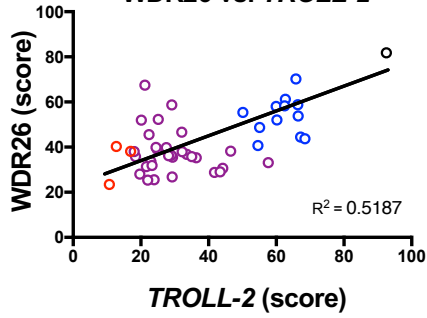**z**

Melanoma TMA – Biomax  
WDR26 vs. *TROLL-3*

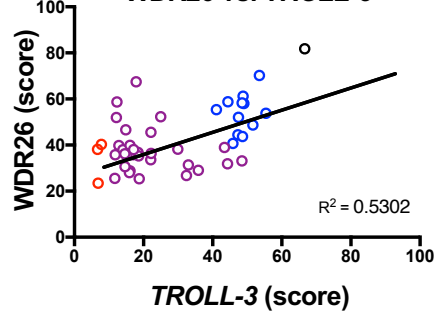

- Stage 1 (n = 3)
- Stage 2 (n = 30)
- Stage 3 (n = 12)
- Stage 4 (n = 1)

**a'**

Melanoma TMA – Moffitt  
*TROLL-2*

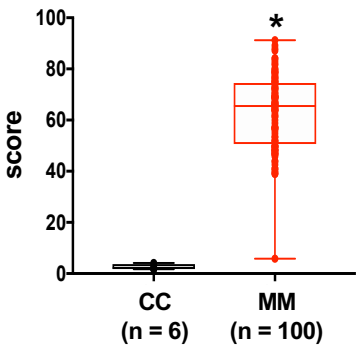**b'**

Melanoma TMA – Moffitt  
*TROLL-3*

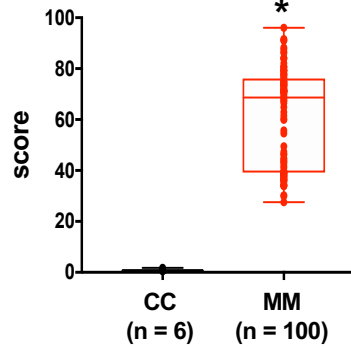**c'**

Melanoma TMA – Moffitt  
WDR26

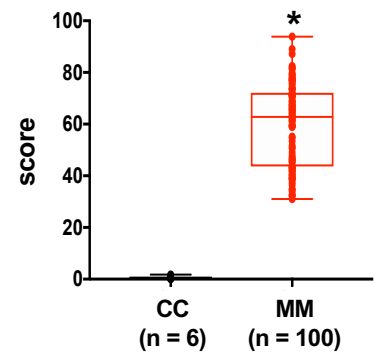**d'**

Melanoma TMA – Moffitt  
WDR26 vs. *TROLL-2*

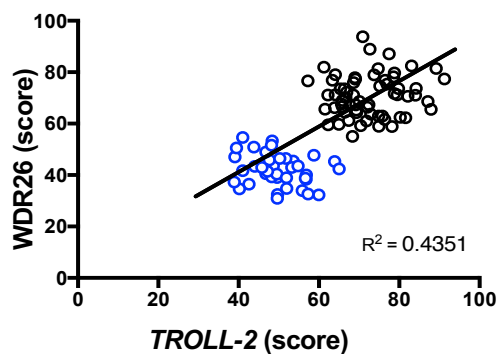**e'**

Melanoma TMA – Moffitt  
WDR26 vs. *TROLL-3*

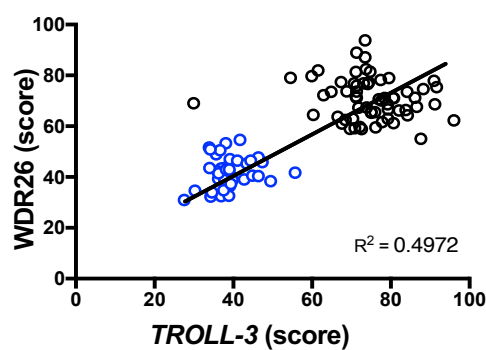

- Stage 3 (n = 39)
- Stage 4 (n = 61)

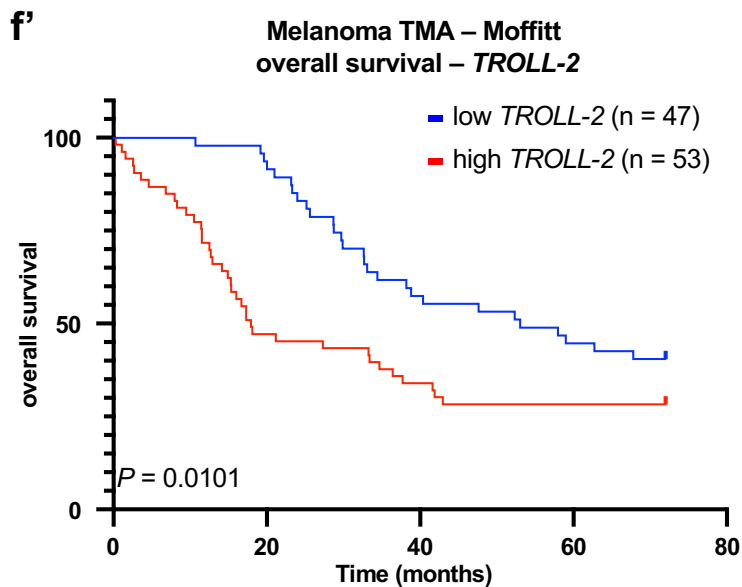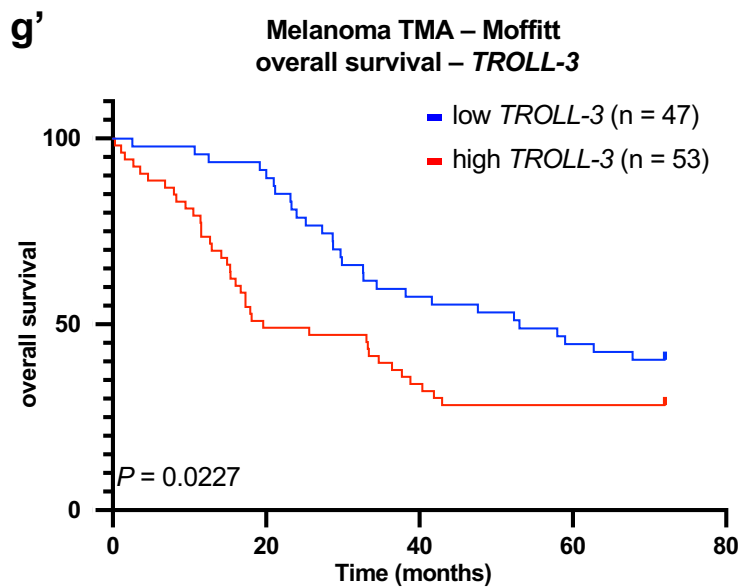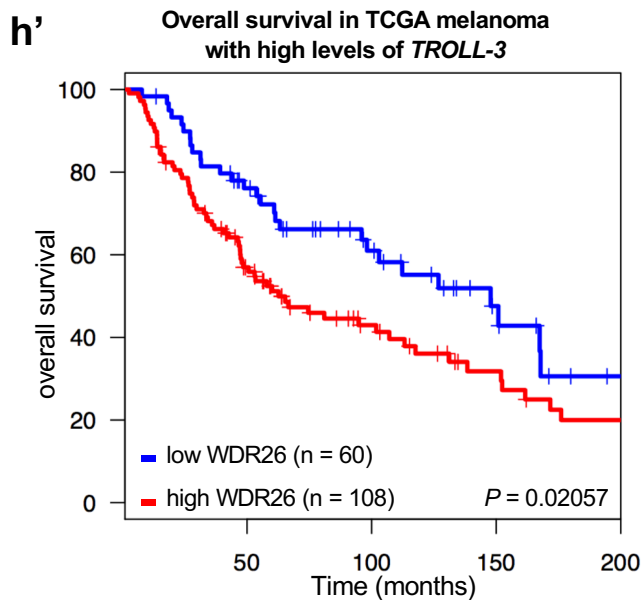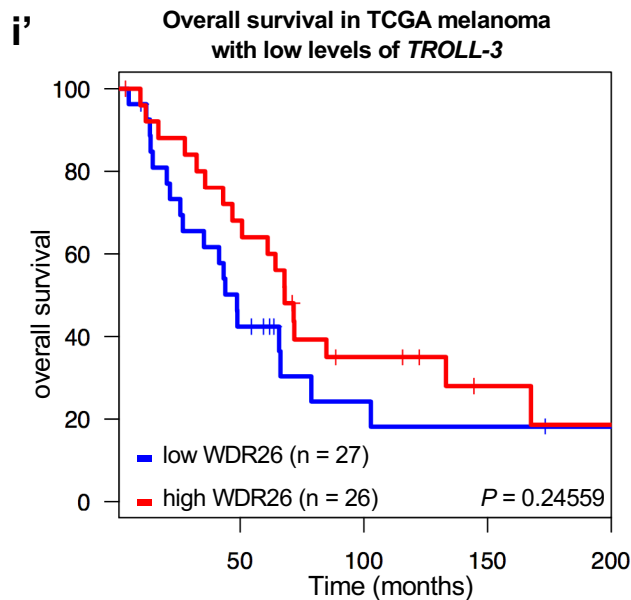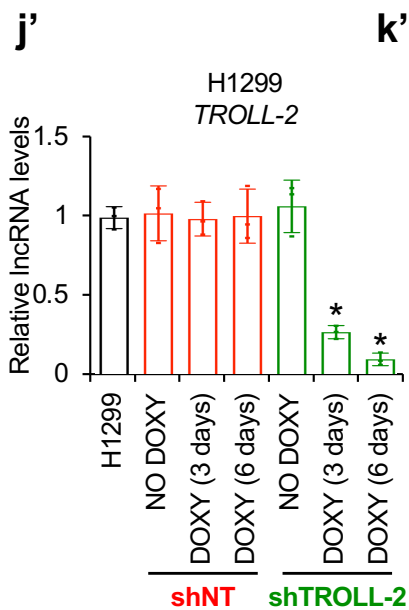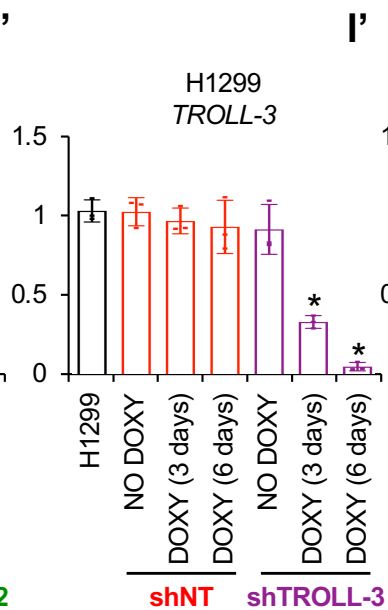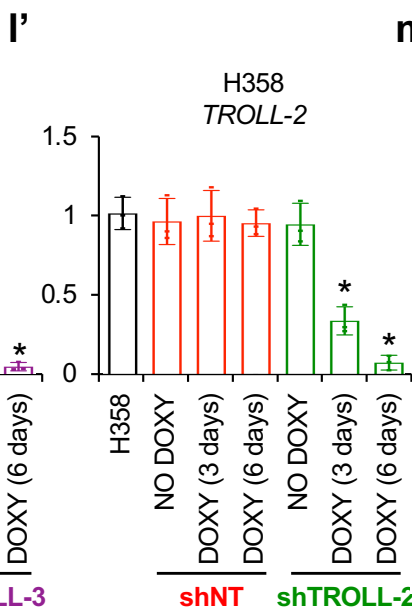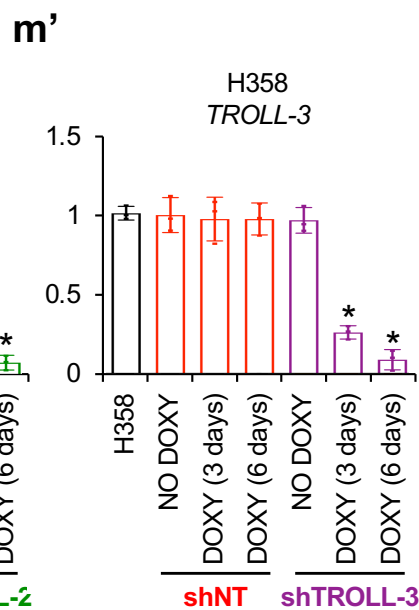

**n'** Intrapulmonary Injections of H1299 cells – Lung Adenocarcinoma

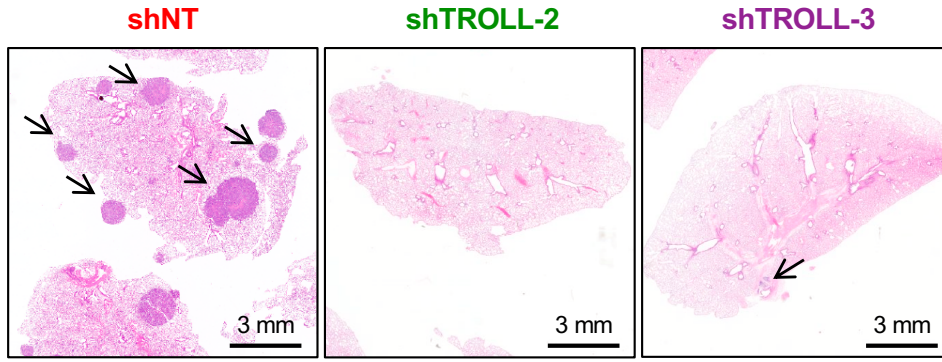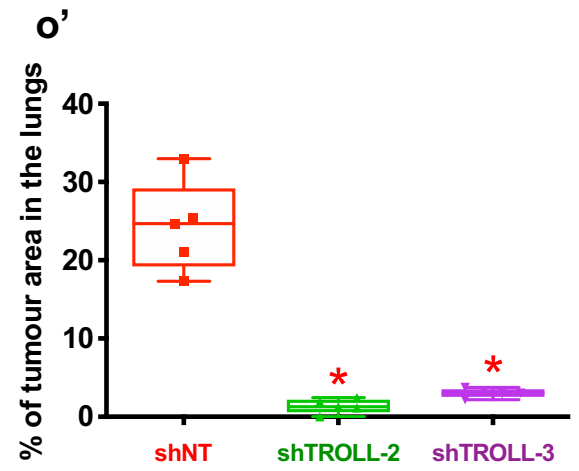

**p'** Intrapulmonary Injections of H358 cells – Lung Adenocarcinoma

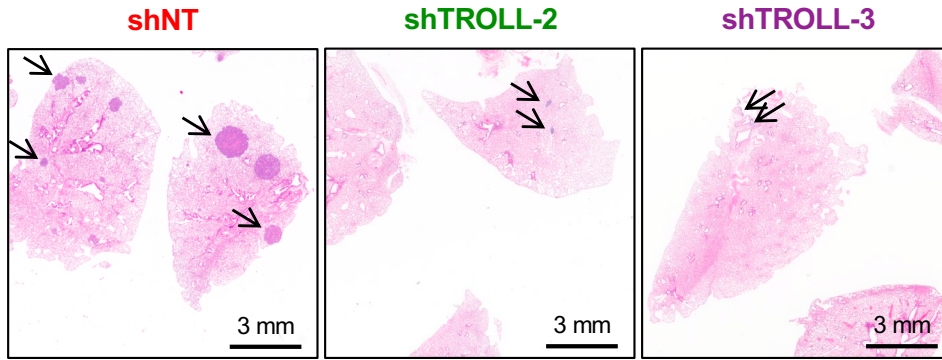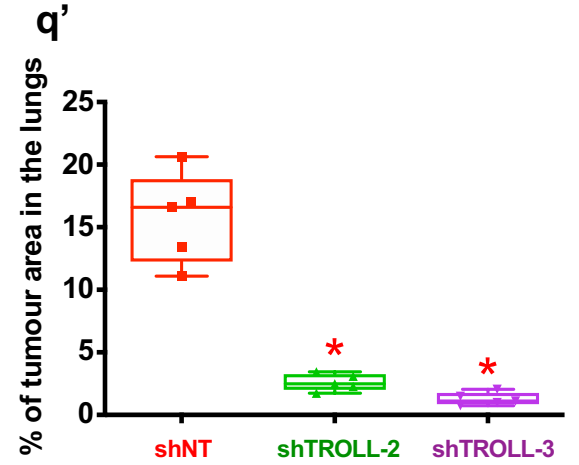

**r'** Intracardiac injections of H1299 cells – Lung Colonization

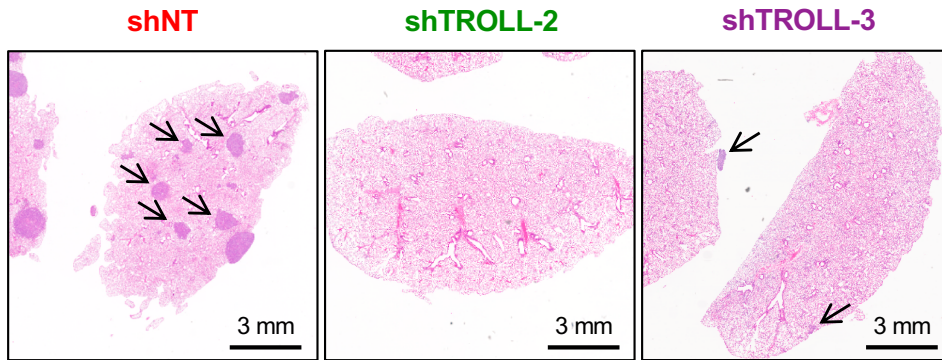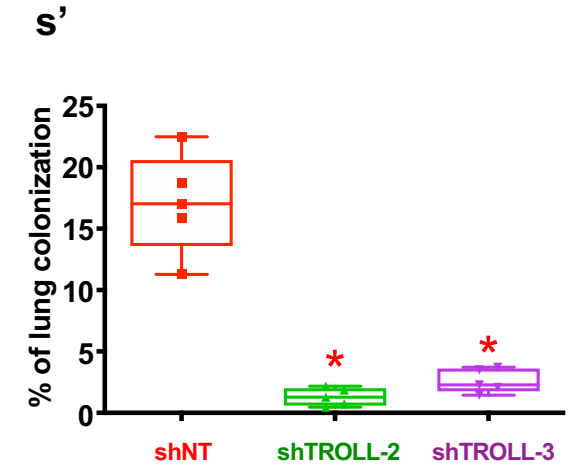

**t'** Intracardiac injections of H358 cells – Lung Colonization

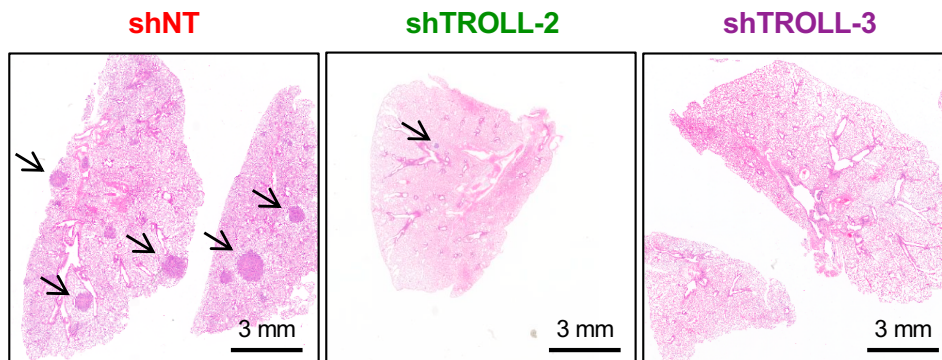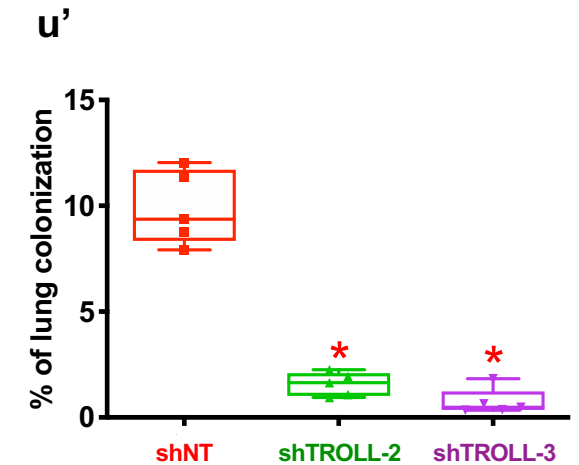

V'

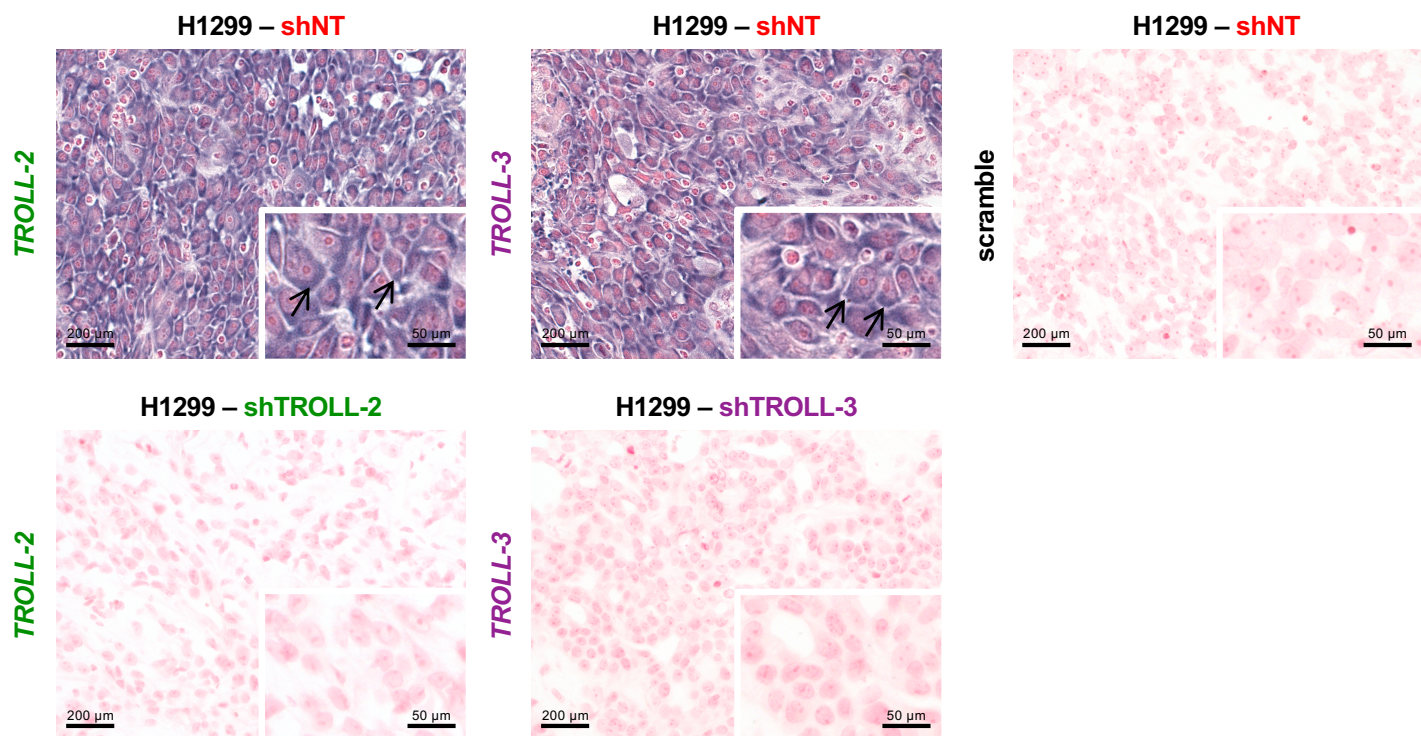

W'

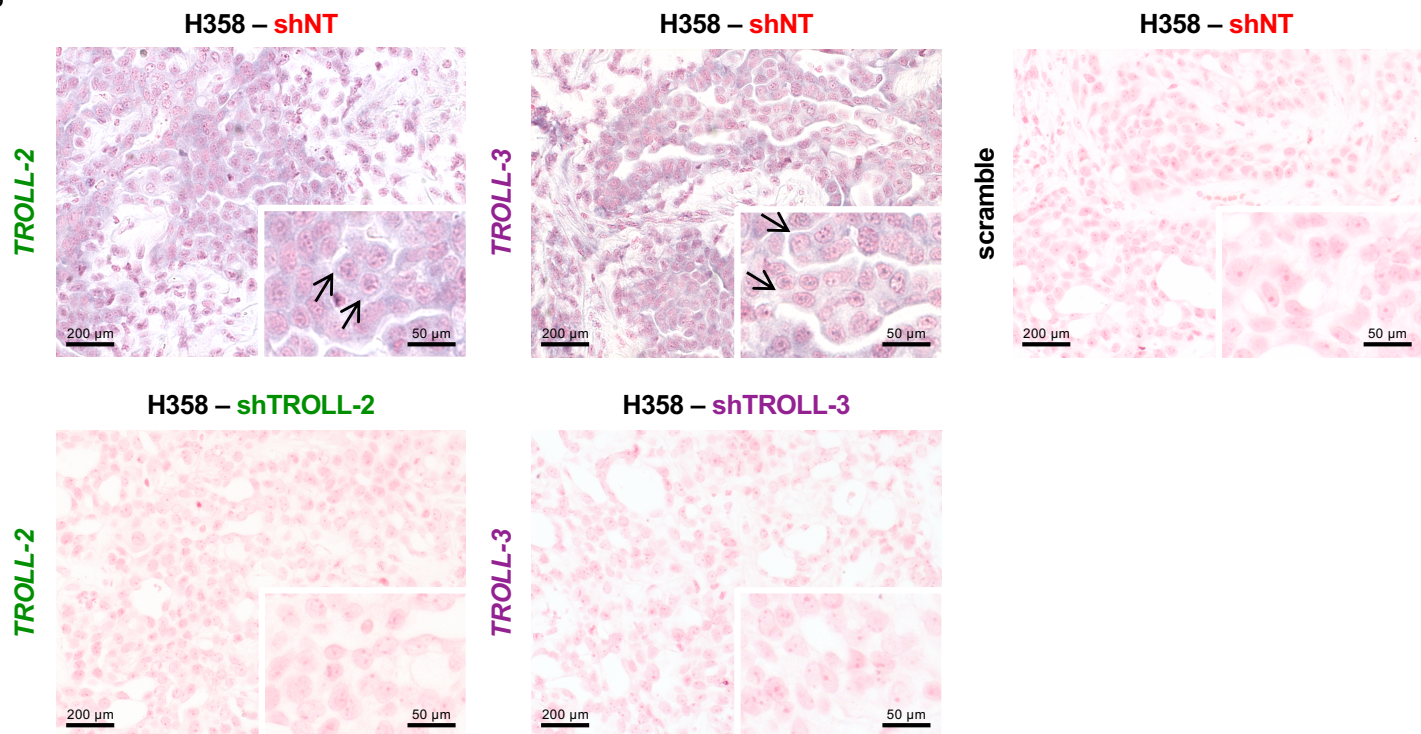



**x'**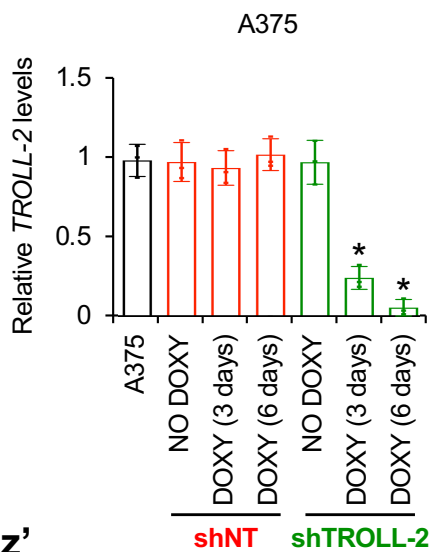**y'**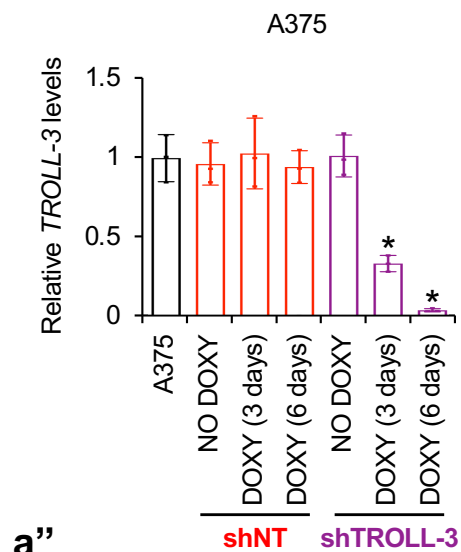**z'**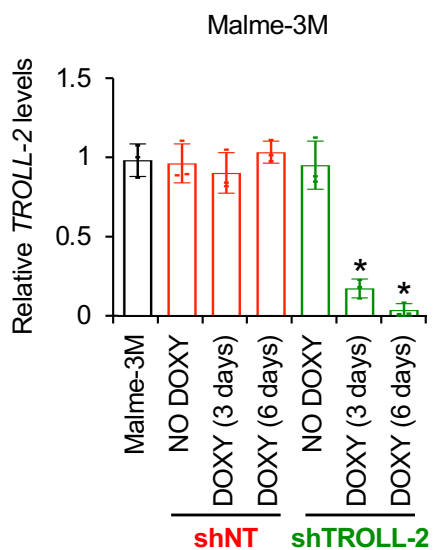**a''**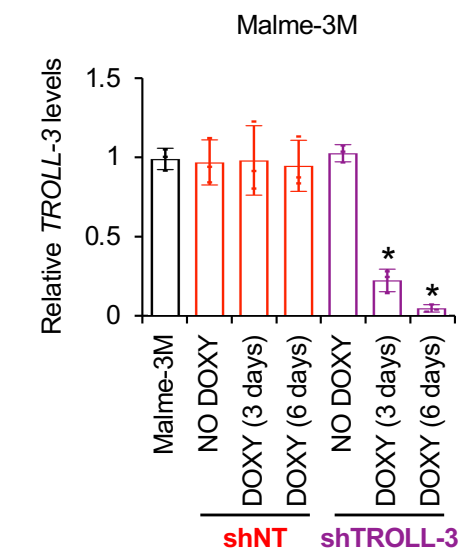**b''**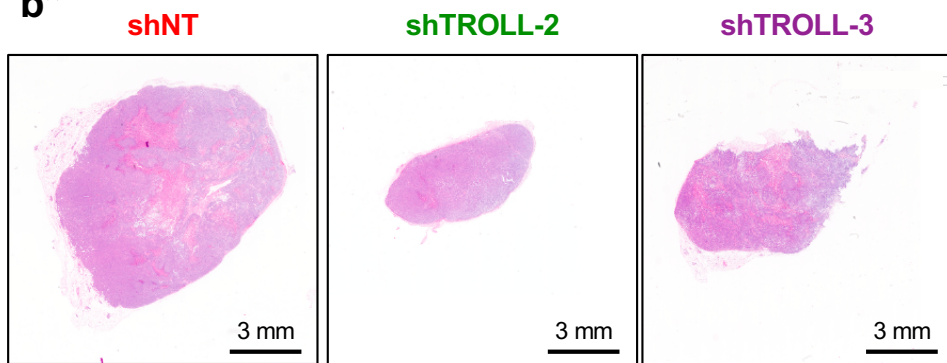**c''**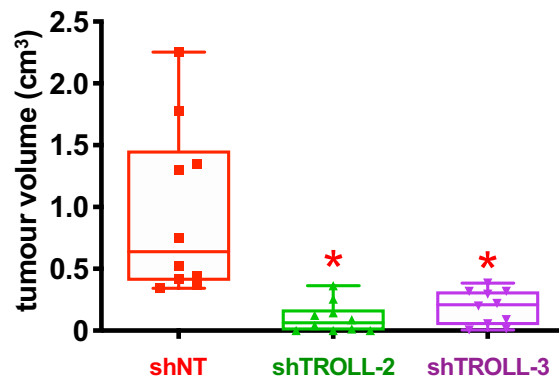**d''**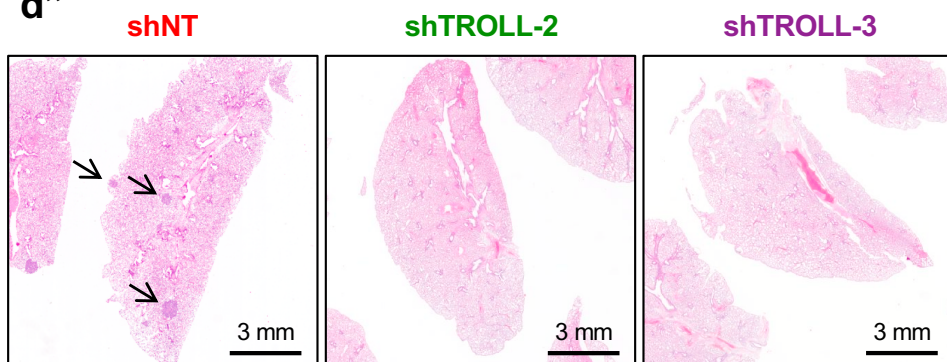**e''**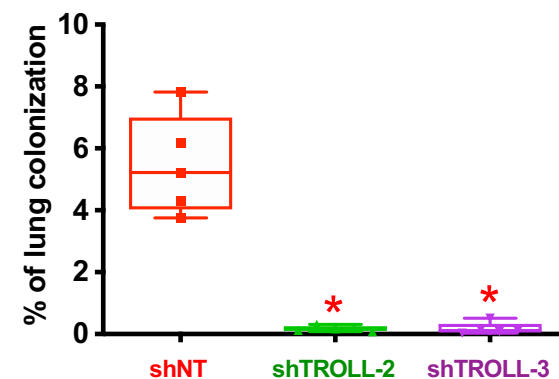

f''

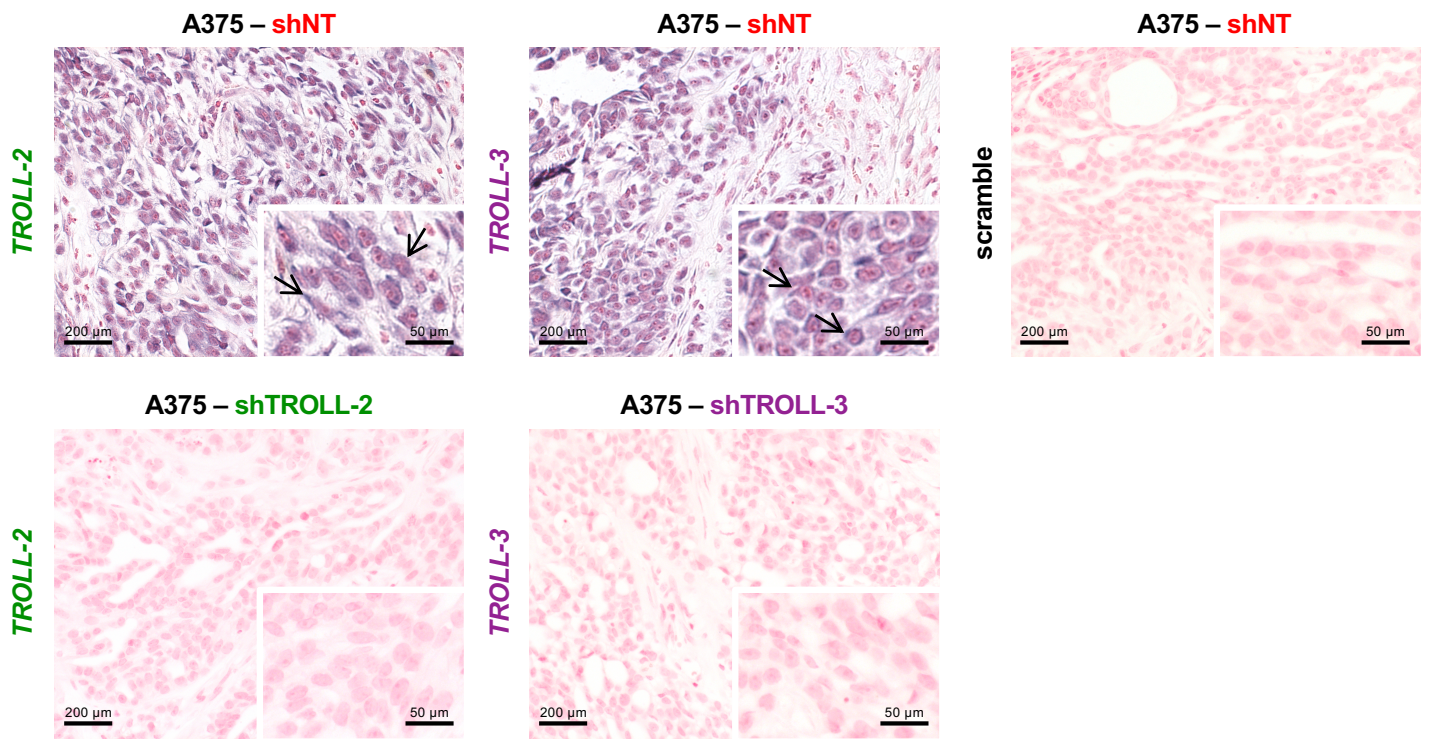

g''

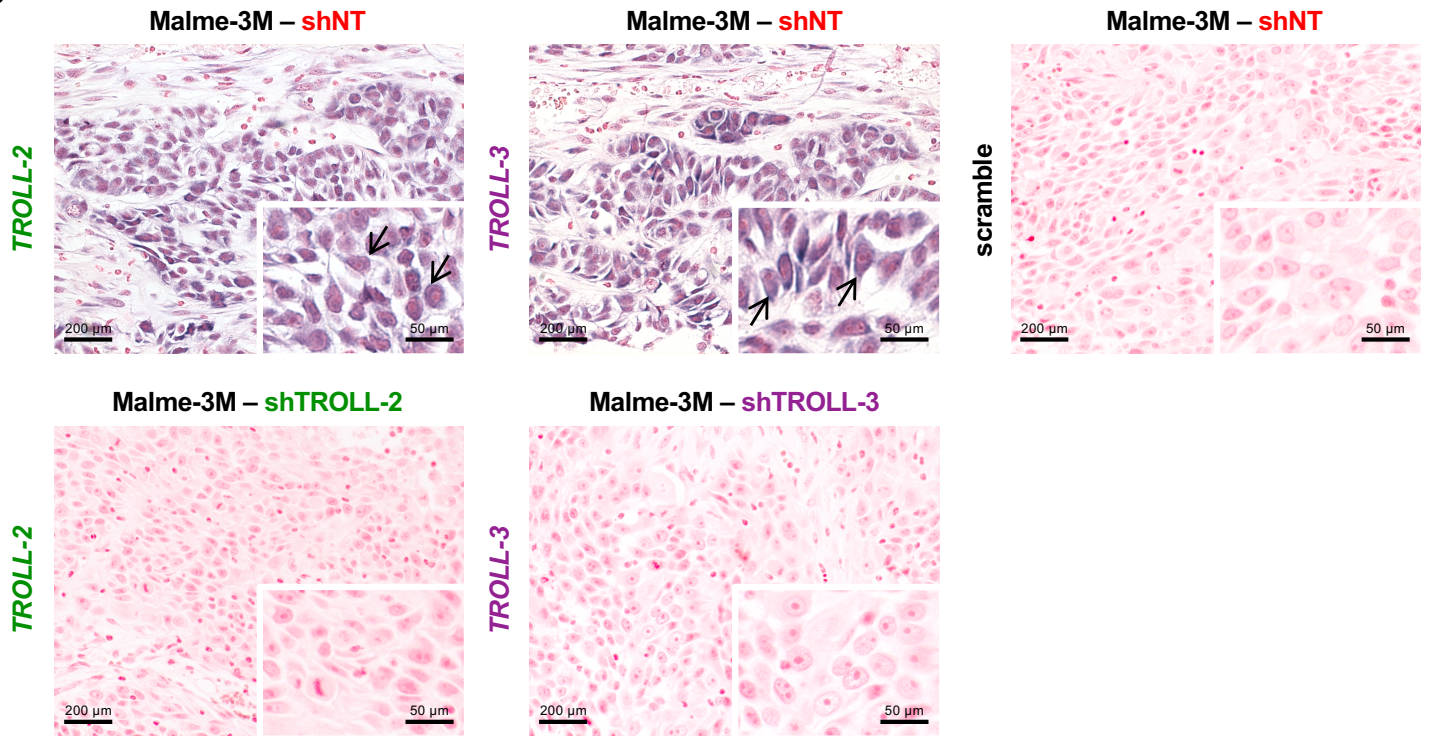

**Supplementary Fig. 5** Cytoplasmic WDR26 correlates with advanced cancers. **a-c** Quantification of the ISH scores of *TROLL-2* (**a**) and *TROLL-3* (**b**), and of the IHC score of WDR26 (**c**) in the indicated TMA. Data were analysed with two-way ANOVA. \* vs. normal ovarian tissue,  $P < 0.005$ . § vs. serous adenocarcinoma,  $P < 0.005$ . **d,e** Correlation of the IHC score and cellular distribution of WDR26 with the ISH score of *TROLL-2* (**d**) and *TROLL-3* (**e**) in the same TMA as in (**a-c**). **f-h** Quantification of the ISH scores of *TROLL-2* (**f**) and *TROLL-3* (**g**), and of the IHC score of WDR26 (**h**) in the indicated TMA. Data were analysed with two-way ANOVA. \* vs. normal colon tissue,  $P < 0.005$ . § vs. polyp,  $P < 0.005$ . # vs. adenoma,  $P < 0.005$ . **i,j** Correlation of the IHC score and cellular distribution of WDR26 with the ISH score of *TROLL-2* (**i**) and *TROLL-3* (**j**) in the same TMA as in (**f-h**). **k-m** Quantification of the ISH scores of *TROLL-2* (**k**) and *TROLL-3* (**l**), and of the IHC score of WDR26 (**m**) in the indicated TMA. Data were analysed with two-way ANOVA. \* vs. normal lung tissue,  $P < 0.005$ . § vs. benign lesion,  $P < 0.005$ . **n,o** Correlation of the IHC score and cellular distribution of WDR26 with the ISH score of *TROLL-2* (**n**) and *TROLL-3* (**o**) in the same TMA as in (**k-m**). **p-r** Quantification of the ISH scores of *TROLL-2* (**p**) and *TROLL-3* (**q**), and of the IHC score of WDR26 (**r**) in the indicated TMA. Data were analysed with two-way ANOVA. \* vs. normal lung tissue,  $P < 0.005$ . § vs. benign lesion,  $P < 0.005$ . # vs. squamous cell carcinoma,  $P < 0.005$ . **s,t** Correlation of the IHC score and cellular distribution of WDR26 with the ISH score of *TROLL-2* (**s**) and *TROLL-3* (**t**) in the same TMA as in (**p-r**). **u-w** Quantification of the ISH scores of *TROLL-2* (**u**) and *TROLL-3* (**v**), and of the IHC score of WDR26 (**w**) in the indicated TMA. Data were analysed with two-way ANOVA. \* vs. benign nevus,  $P < 0.005$ . **y,z** Correlation of the IHC score and cellular distribution of WDR26 with the ISH score of *TROLL-2* (**y**) and *TROLL-3* (**z**) in the same TMA as in (**u-w**). **a'-c'** Quantification of the ISH scores of *TROLL-2* (**a'**) and *TROLL-3* (**b'**) and of the IHC scores of WDR26 (**c'**) in the indicated TMA. Data were analysed with two-way ANOVA. \* vs. control cases,  $P < 0.005$ . **d',e'** Correlation of the IHC score and cellular distribution of WDR26 with the ISH score of *TROLL-2* (**d'**) and *TROLL-3* (**e'**) in the TMA as in (**a'-c'**). **f',g'** Kaplan-Meier curves of overall survival in the indicated TMA based on the levels of *TROLL-2* (**f'**) and *TROLL-3* (**g'**). COXPH  $P$  values are shown. **h',i'** Kaplan-Meier curves of overall survival in the indicated TMA based on the levels of *TROLL-2* (**h'**) and *TROLL-3* (**i'**). COXPH  $P$  values are shown. **j',k'** qRT-PCR for *TROLL-2* (**j'**) and *TROLL-3* (**k'**) in H1299 cells infected with the indicated shRNAs. Data are mean  $\pm$  SD,  $n = 3$  biological replicates, \* vs. shNT no doxy,  $P < 0.005$ , two-tailed Student's  $t$  test. **l',m'** qRT-PCR for *TROLL-2* (**l'**) and *TROLL-3* (**m'**) in H358 cells infected with the indicated shRNAs. Data are mean  $\pm$  SD,  $n = 3$  biological replicates, \* vs. shNT no doxy,  $P < 0.005$ , two-tailed Student's  $t$  test. **n'** Representative H&E stained cross sections of lung adenocarcinomas derived from H1299 cells infected with the indicated shRNAs. **i** Quantification of the lung adenocarcinomas described in (**n'**).  $n = 5$  mice for all groups, \* vs. NT,  $P < 0.005$ , two-tailed Student's  $t$  test. **p'** Representative H&E stained cross sections of lung adenocarcinomas derived from H358 cells infected with the indicated shRNAs. **k** Quantification of the lung adenocarcinomas described in (**p'**).  $n = 5$  mice for all groups, \* vs. NT,  $P < 0.005$ , two-tailed Student's  $t$  test. **r'** Representative H&E stained cross sections of lung colonies derived from H1299 cells infected with the indicated shRNAs. **s'** Quantification of the lung colonies described in (**r'**).  $n = 5$  mice for all groups, \* vs. NT,  $P < 0.005$ , two-tailed Student's  $t$  test. **t'** Representative H&E stained cross sections of lung colonies derived from H358 cells infected with the indicated shRNAs. **u'** Quantification of the lung colonies described in (**t'**).  $n = 5$  mice for all groups, \* vs. NT,  $P < 0.005$ , two-tailed Student's  $t$  test. **v'** Representative images of ISH for *TROLL-2* (left panels) and *TROLL-3* (middle panels) in tumours derived from H1299 cells. **w'** Representative images of ISH for *TROLL-2* (left panels) and *TROLL-3* (middle panels) in tumours derived from H358 cells. **x',y'** qRT-PCR for *TROLL-2* (**x'**) and *TROLL-3* (**y'**) in A375 cells infected with the indicated shRNAs. Data are mean  $\pm$  SD,  $n = 3$  biological replicates, \* vs. shNT no doxy,  $P < 0.005$ , two-tailed Student's  $t$  test. **z',a''** qRT-PCR for *TROLL-2* (**z'**) and *TROLL-3* (**z''**) in Malme-3M cells infected with the indicated shRNAs. Data are mean  $\pm$  SD,  $n = 3$  biological replicates, \* vs. shNT no doxy,  $P < 0.005$ , two-tailed Student's  $t$  test. **f''** Representative images of ISH for *TROLL-2* (left panels) and *TROLL-3* (middle panels) in tumours derived from A375 cells. **g''** Representative images of ISH for *TROLL-2* (left panels) and *TROLL-3* (middle panels) in tumours derived from Malme-3M cells. Micrographs are representative of  $n = 10$  tumours. All boxplots represent the individual data points, median and whiskers (min to max method). Source data are provided as Source data file.

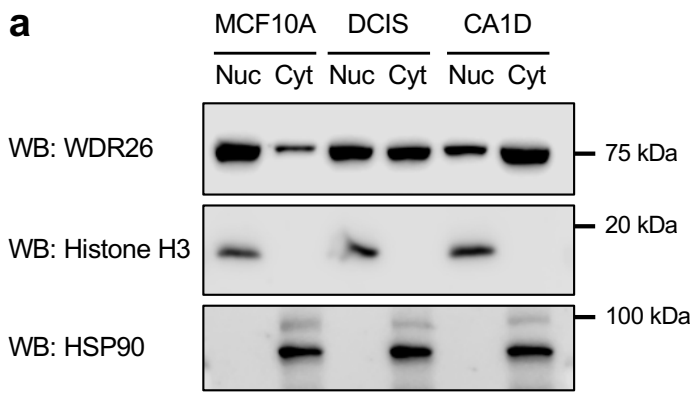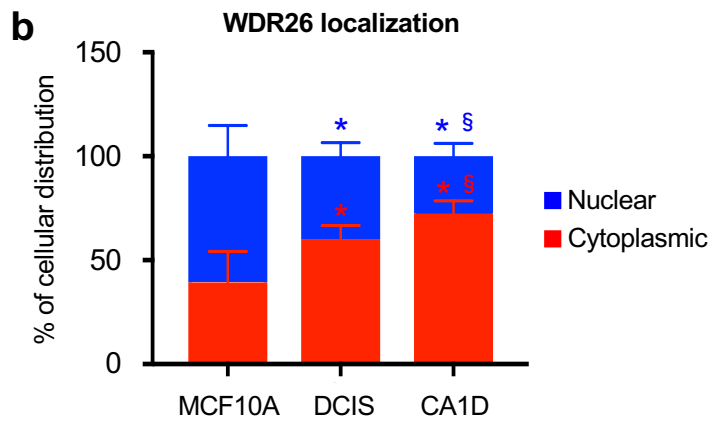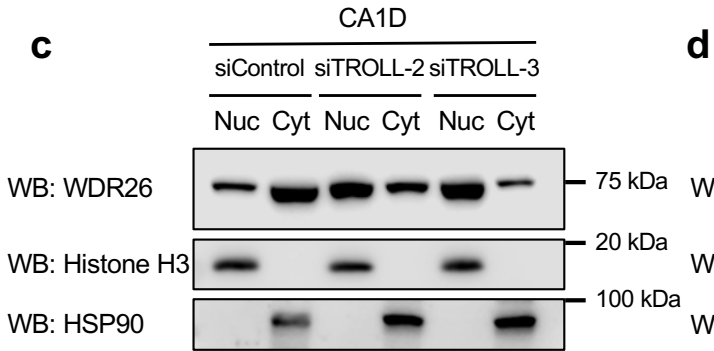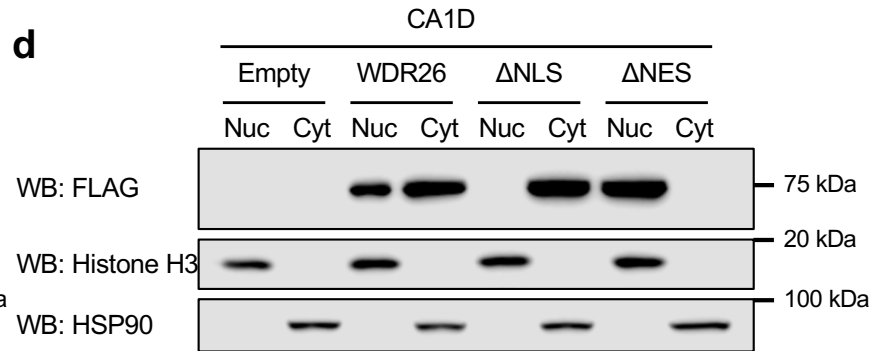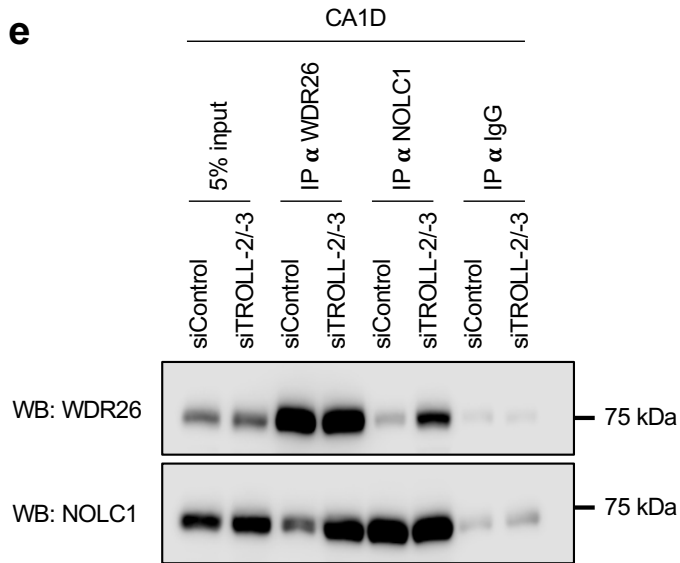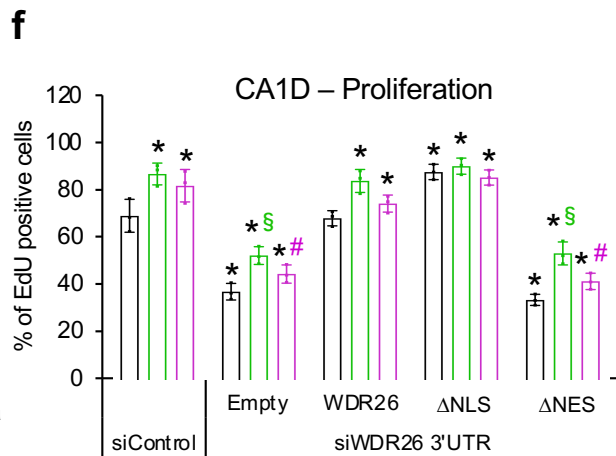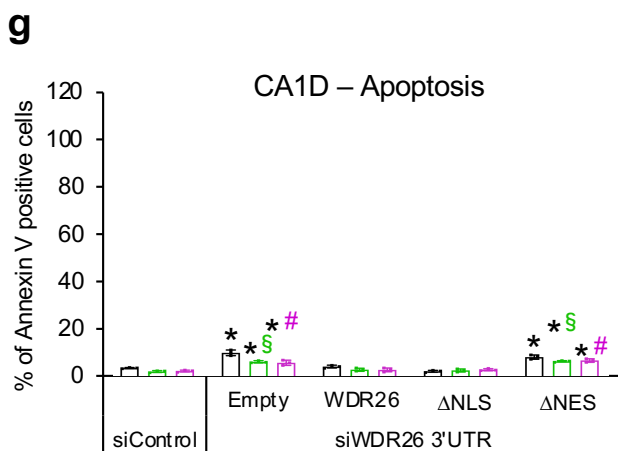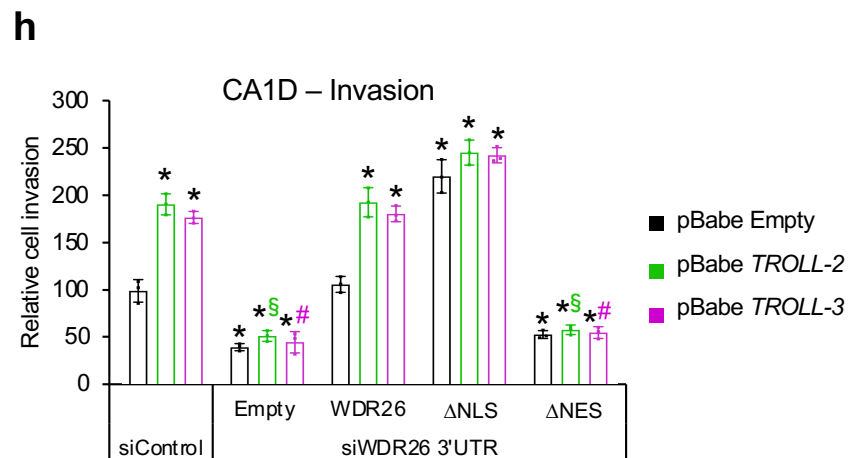

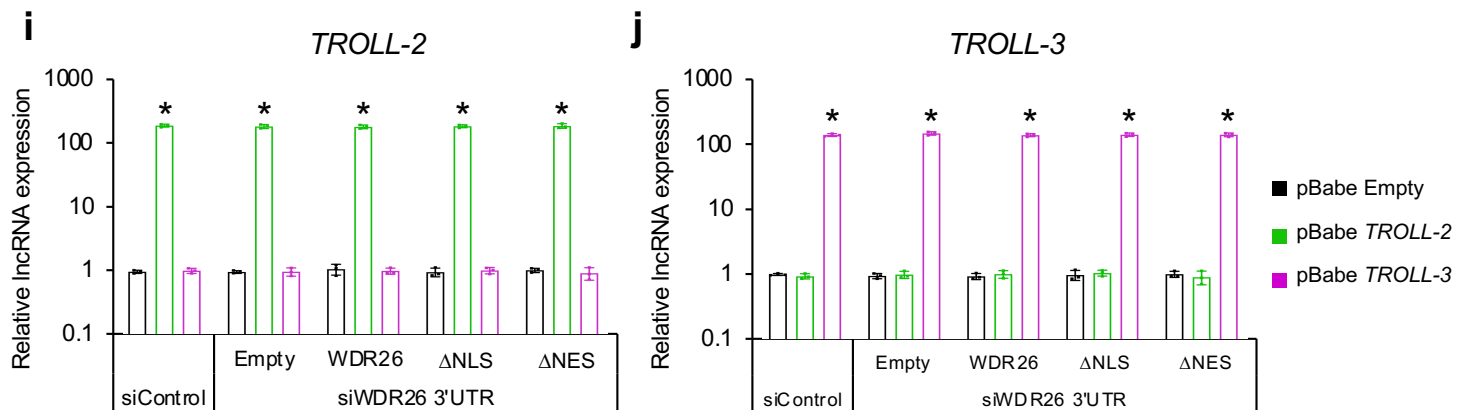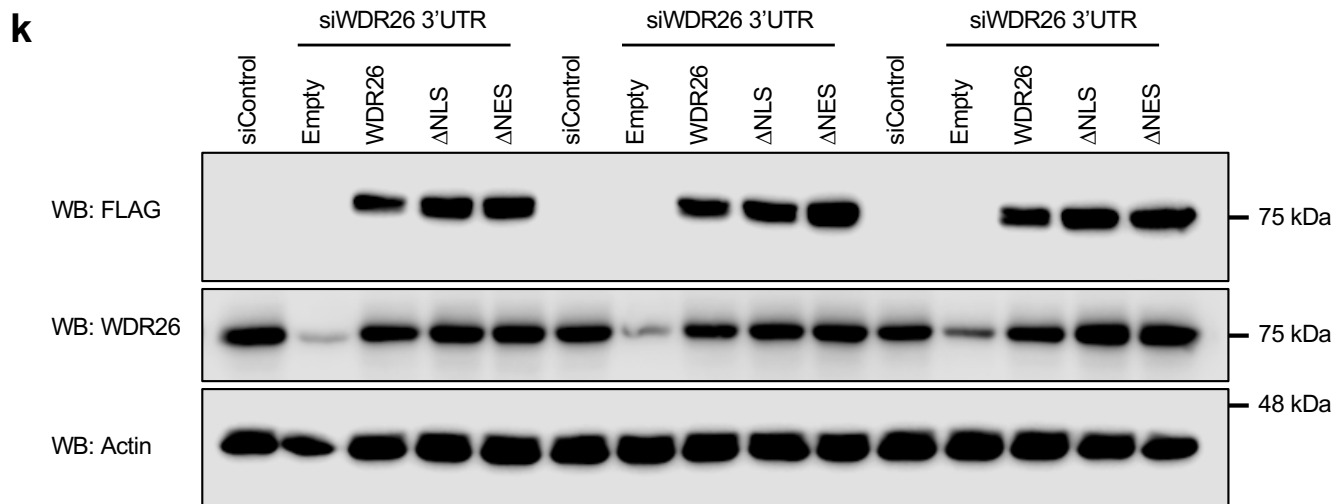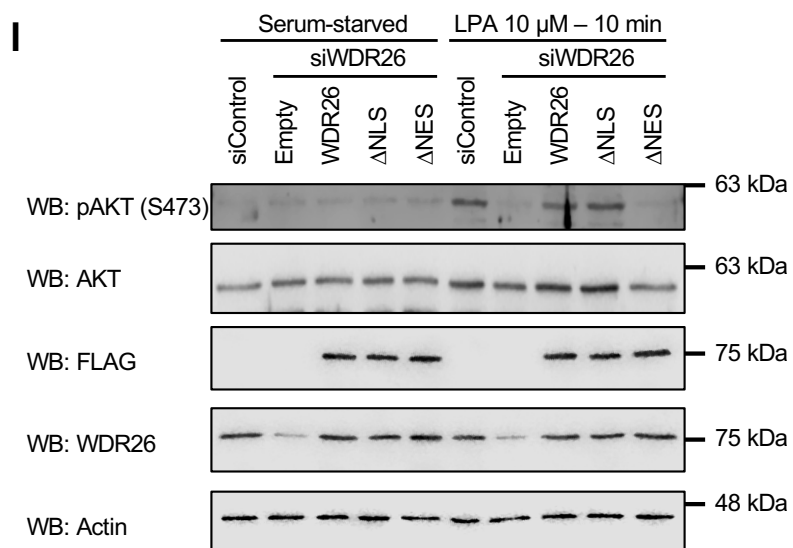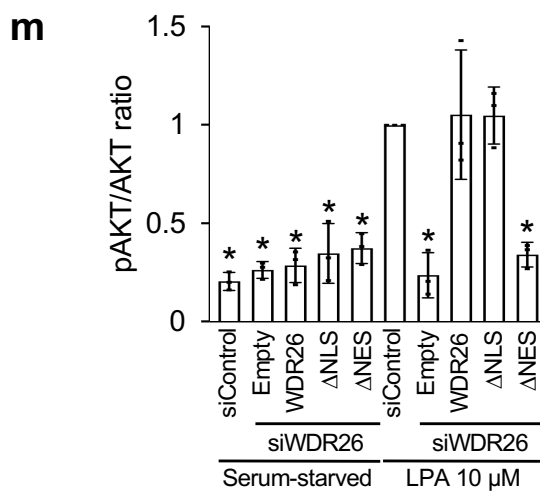

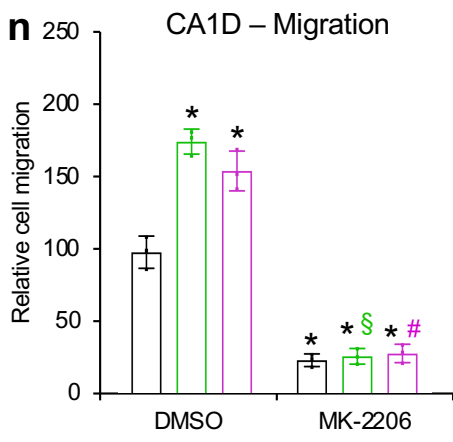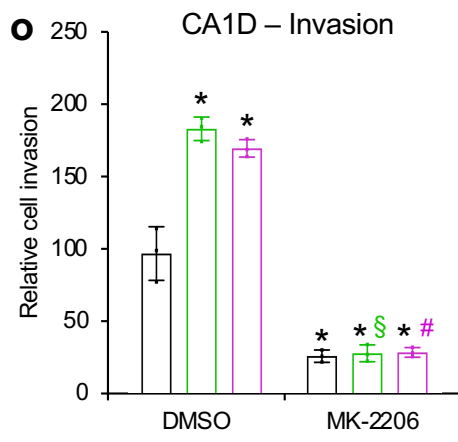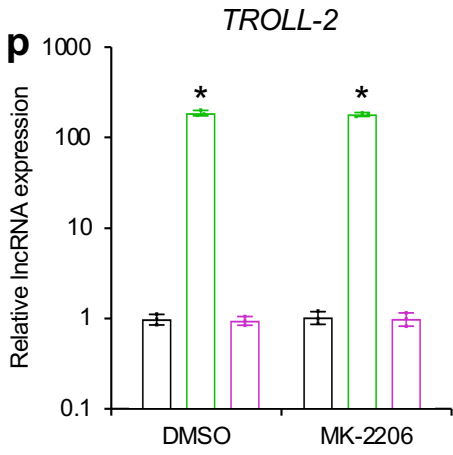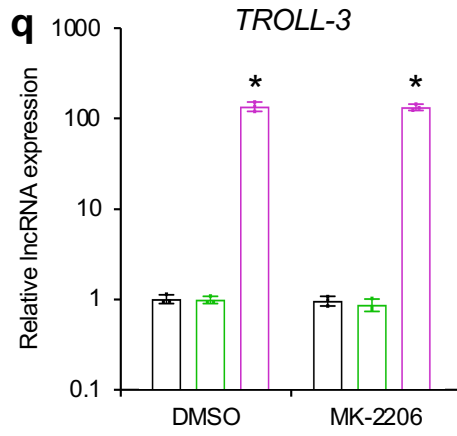

■ pBabe Empty  
 ■ pBabe TROLL-2  
 ■ pBabe TROLL-3

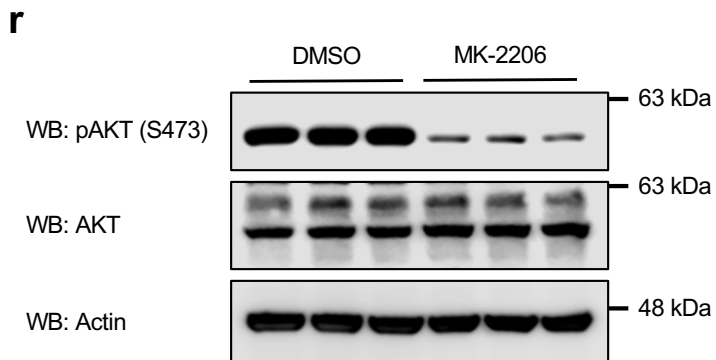

**S** Breast cancer progression TMA – Biomax  
pAKT

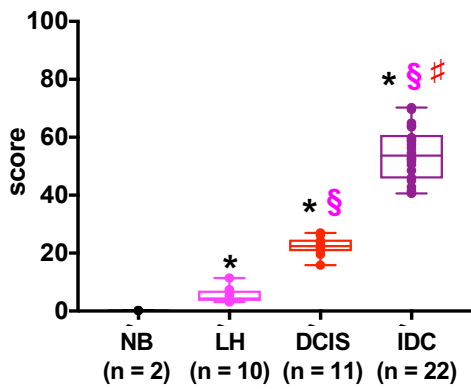

**t** Breast cancer progression TMA – Biomax  
pAKT vs. WDR26

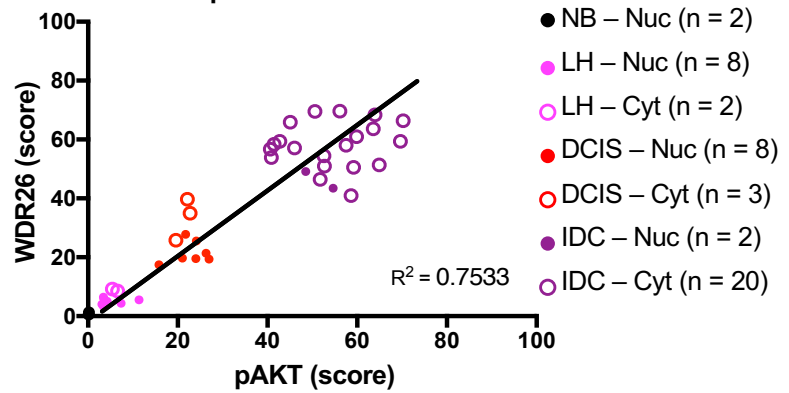

**U** Breast cancer progression TMA – Biomax  
*TROLL-2* vs. pAKT

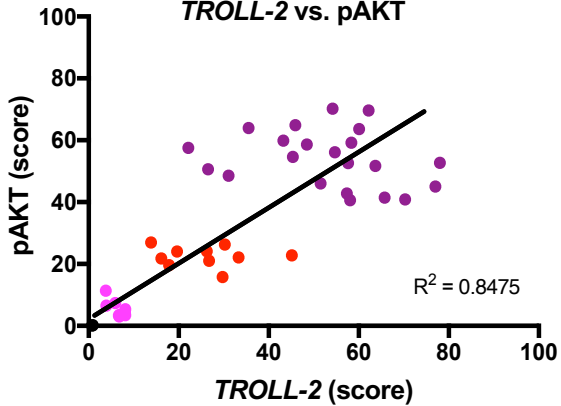

**V** Breast cancer progression TMA – Biomax  
*TROLL-3* vs. pAKT

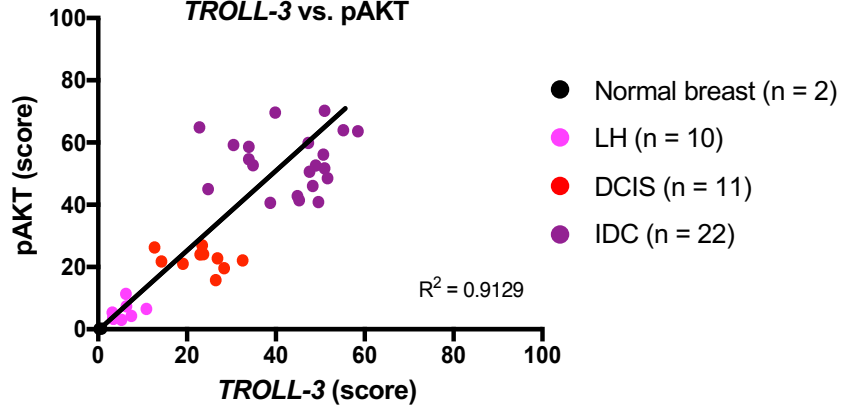

**W** Invasive breast cancer TMA – Biomax  
pAKT

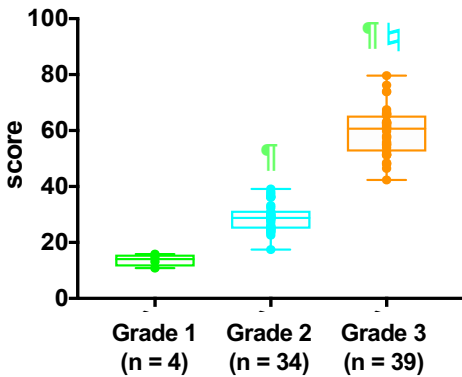

**X** Invasive breast cancer TMA – Biomax  
pAKT vs. WDR26

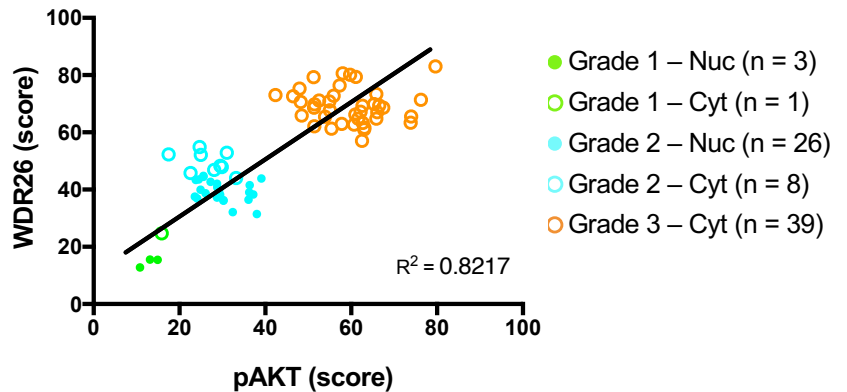

**y** Invasive breast cancer TMA – Biomax  
*TROLL-2* vs. pAKT

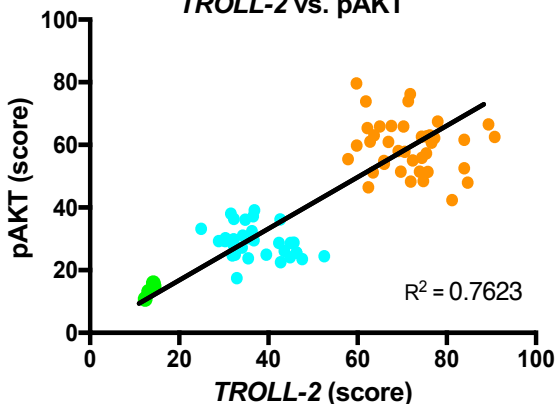

**Z** Invasive breast cancer TMA – Biomax  
*TROLL-3* vs. pAKT

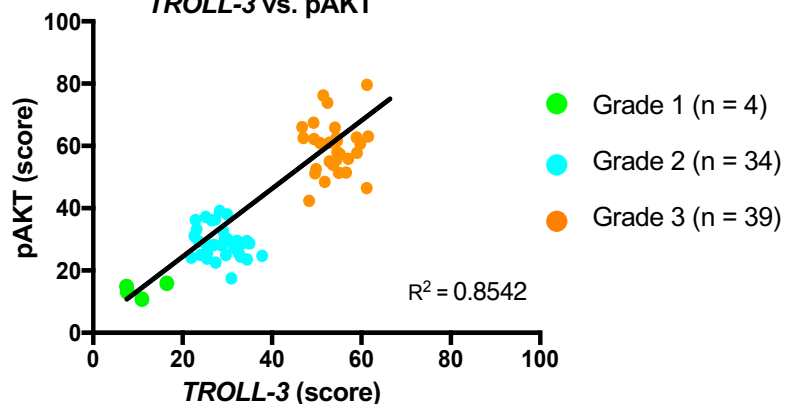

**a'** Invasive breast cancer TMA – Moffitt  
pAKT

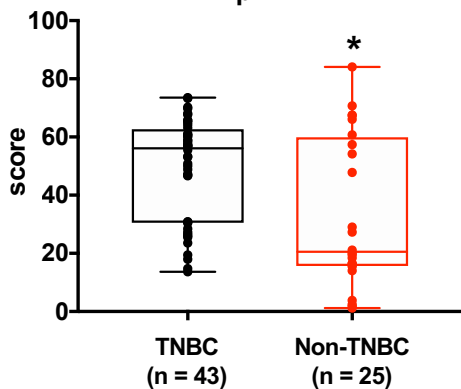

**b'** Invasive breast cancer TMA – Moffitt  
pAKT vs. WDR26

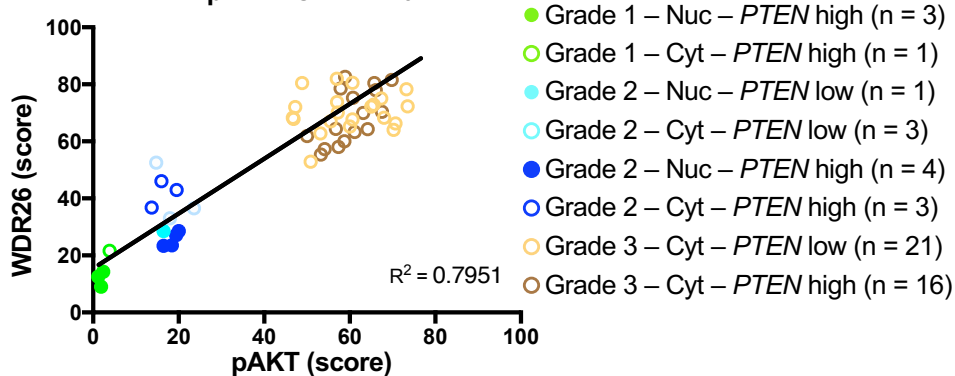

**c'** Invasive breast cancer TMA – Moffitt  
*TROLL-2* vs. pAKT

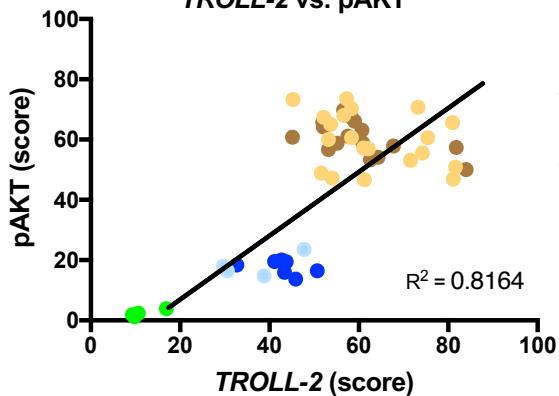

**d'** Invasive breast cancer TMA – Moffitt  
*TROLL-3* vs. pAKT

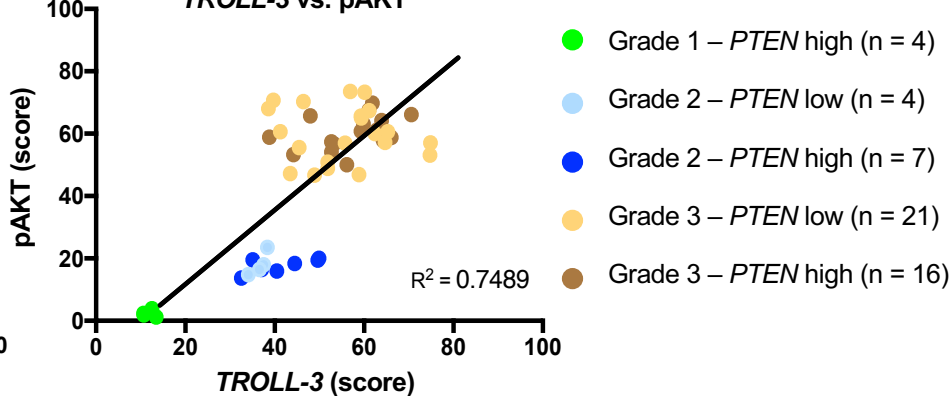

**e'** Ovarian cancer TMA – Biomax  
pAKT

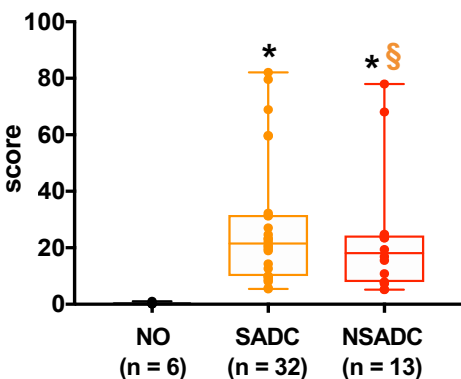

**f'** Ovarian cancer TMA  
pAKT vs. WDR26

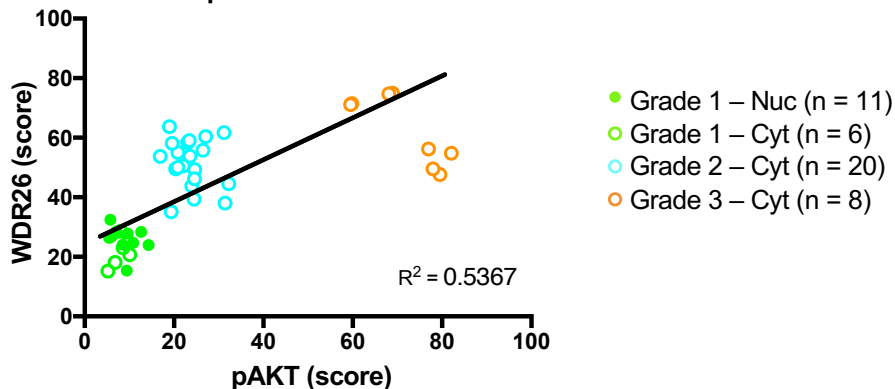

**g'** Ovarian cancer TMA  
*TROLL-2* vs. pAKT

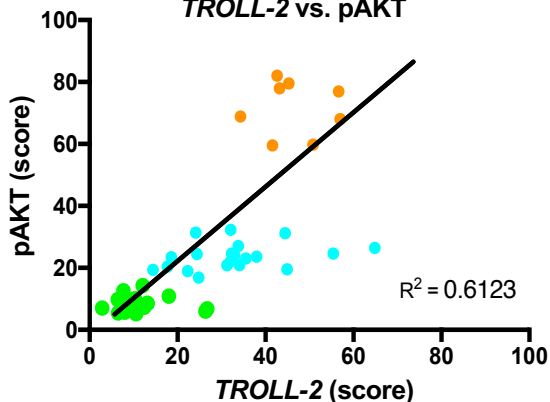

**h'** Ovarian cancer TMA  
*TROLL-3* vs. pAKT

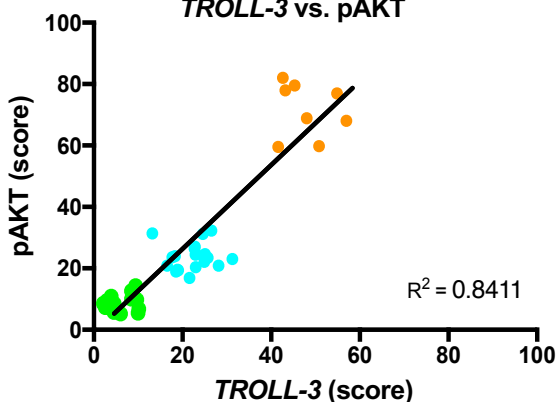



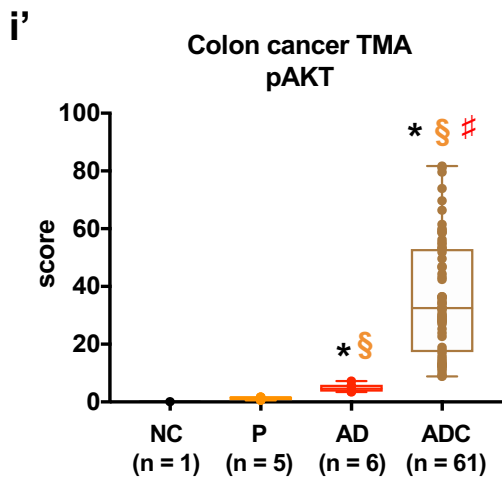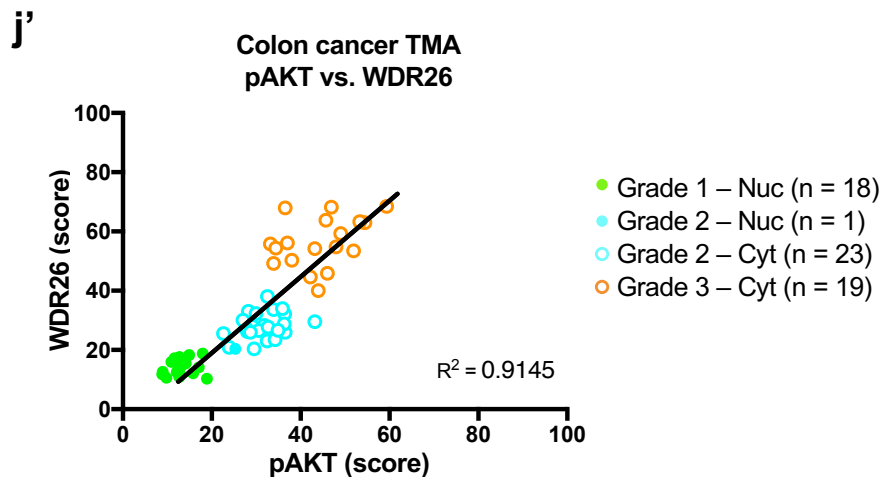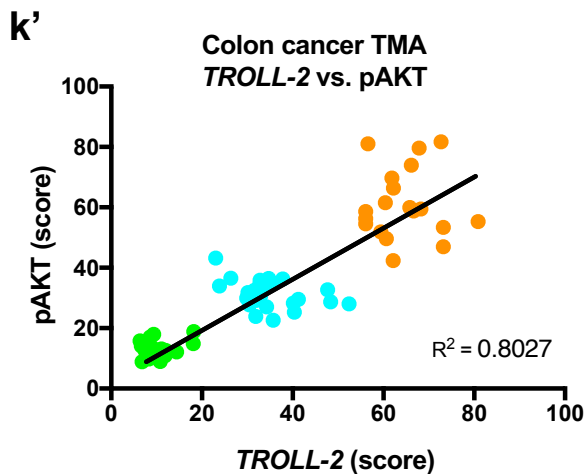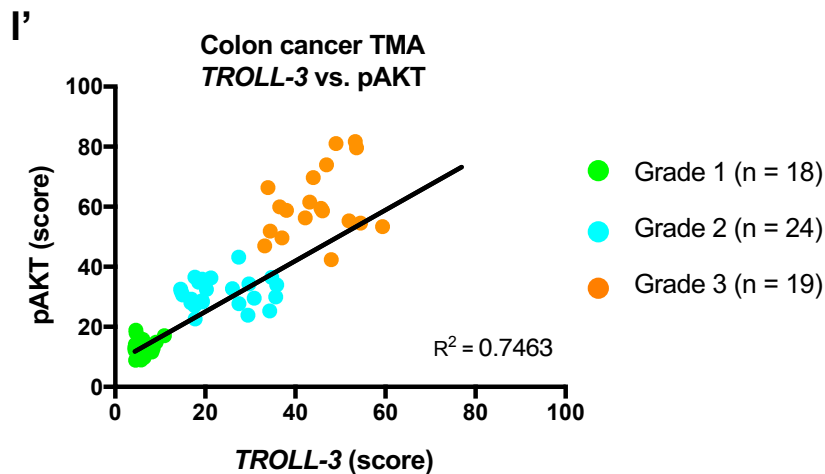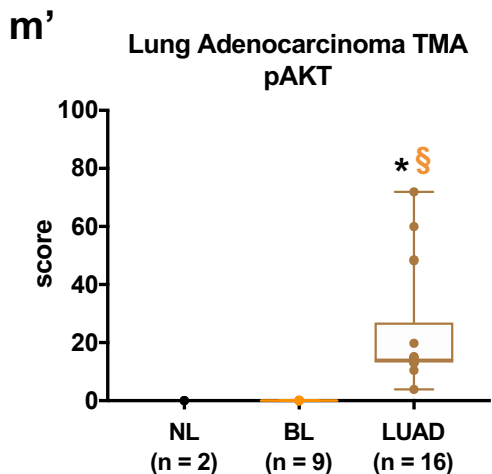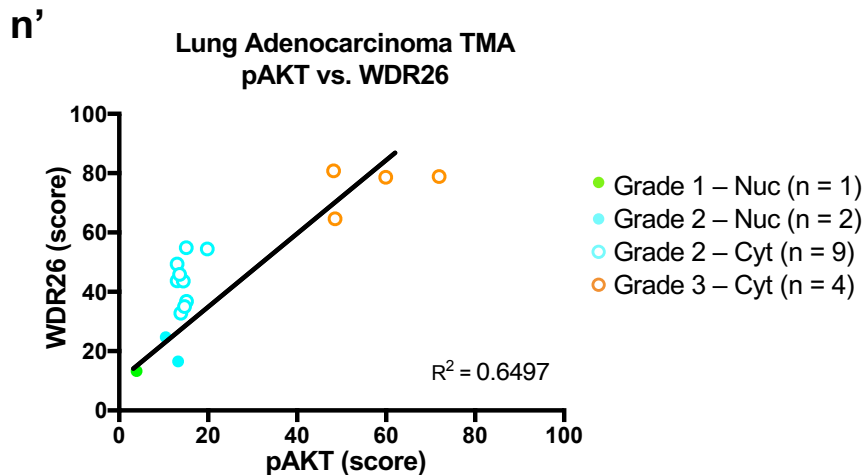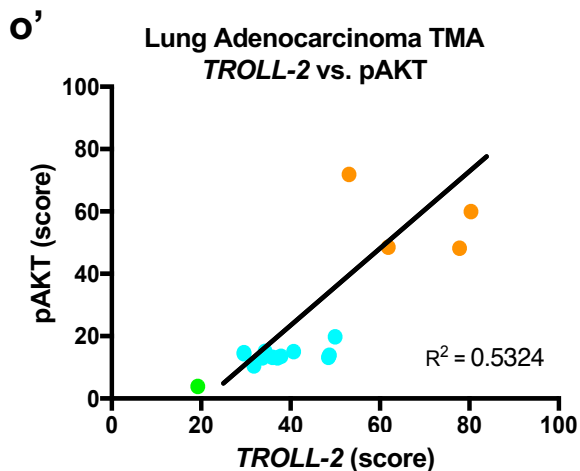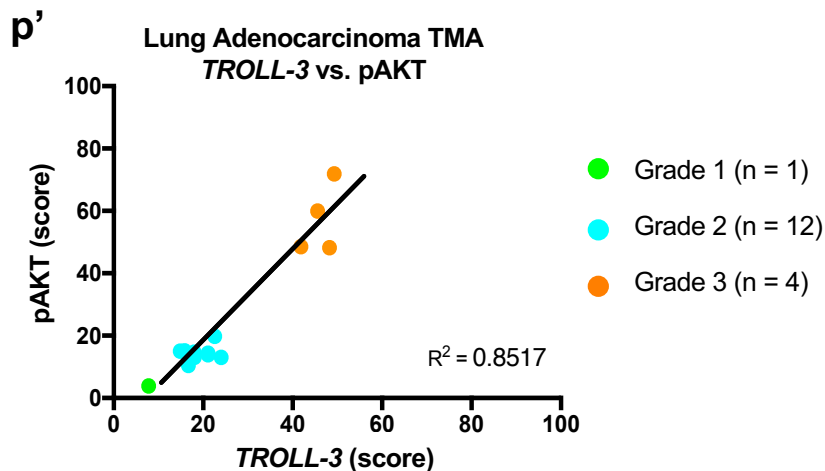

**q'** Lung Squamous Cell Carcinoma TMA  
pAKT

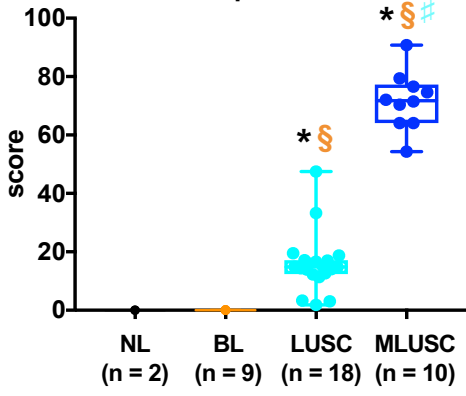

**r'** Lung Squamous Cell Carcinoma TMA  
pAKT vs. WDR26

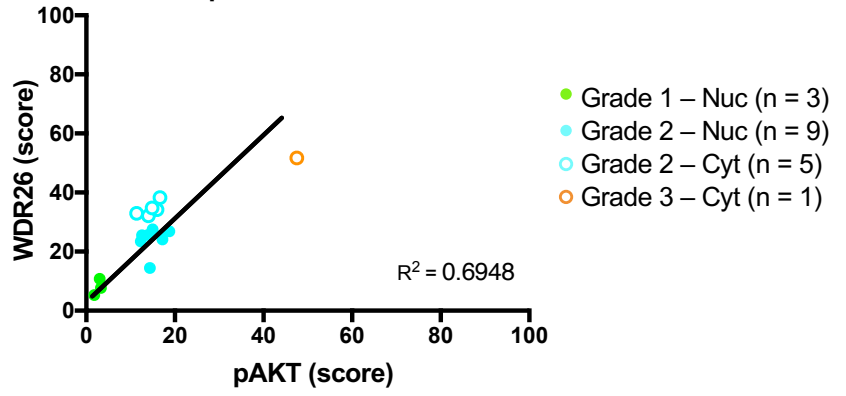

**s'** Lung Squamous Cell Carcinoma TMA  
TROLL-2 vs. pAKT

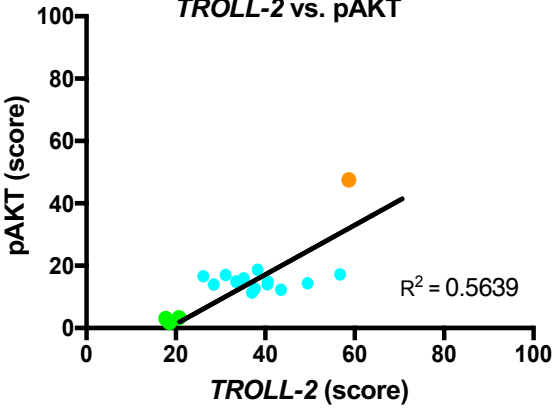

**t'** Lung Squamous Cell Carcinoma TMA  
TROLL-3 vs. pAKT

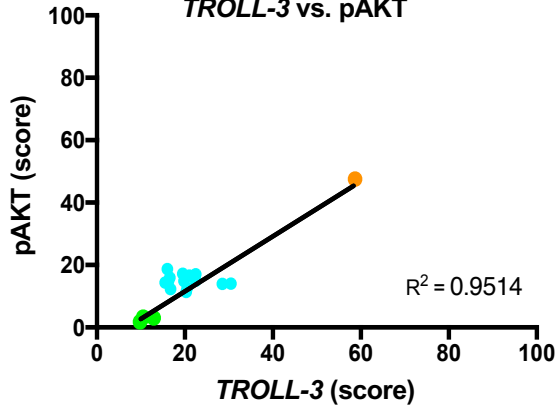

**u'** Melanoma TMA – Biomax  
pAKT

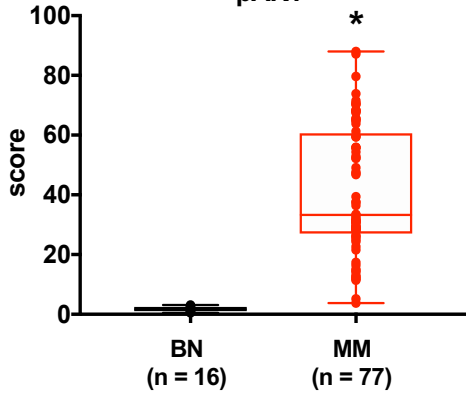

**v'** Melanoma TMA – Biomax  
pAKT vs. WDR26

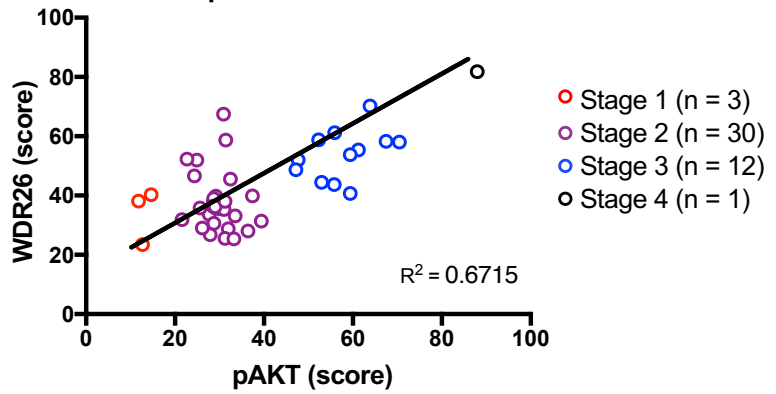

**w'** Melanoma TMA – Biomax  
TROLL-2 vs. pAKT

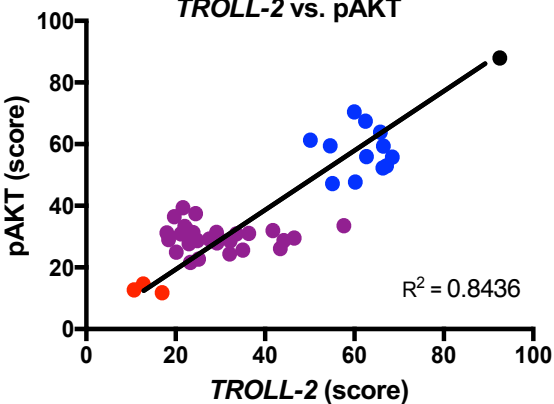

**x'** Melanoma TMA – Biomax  
TROLL-3 vs. pAKT

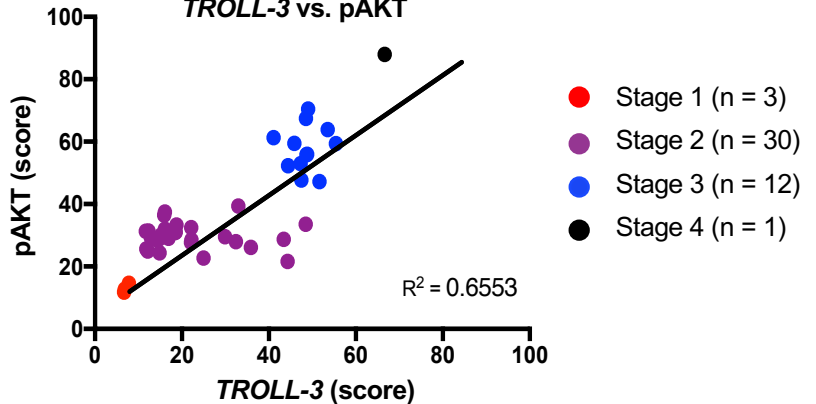

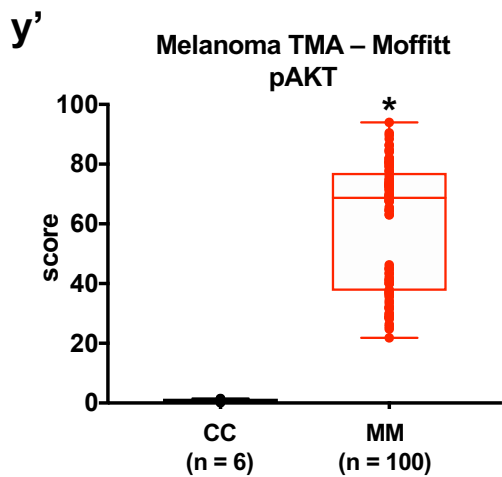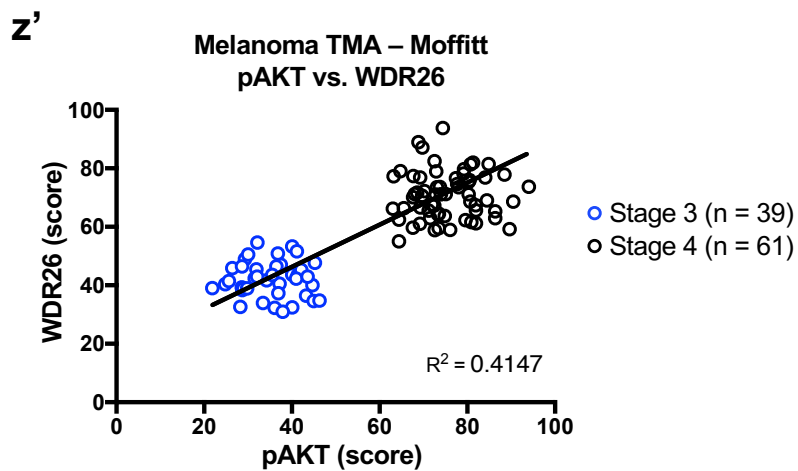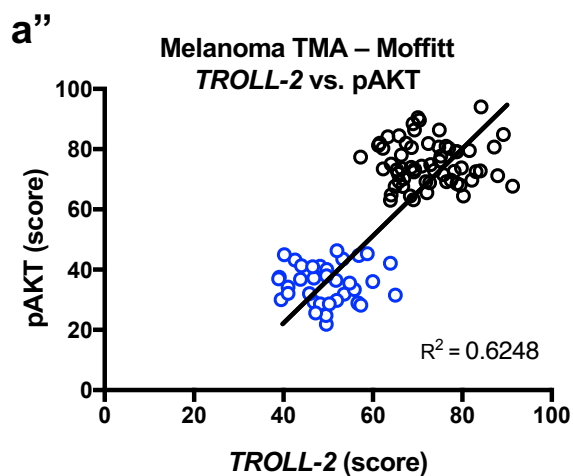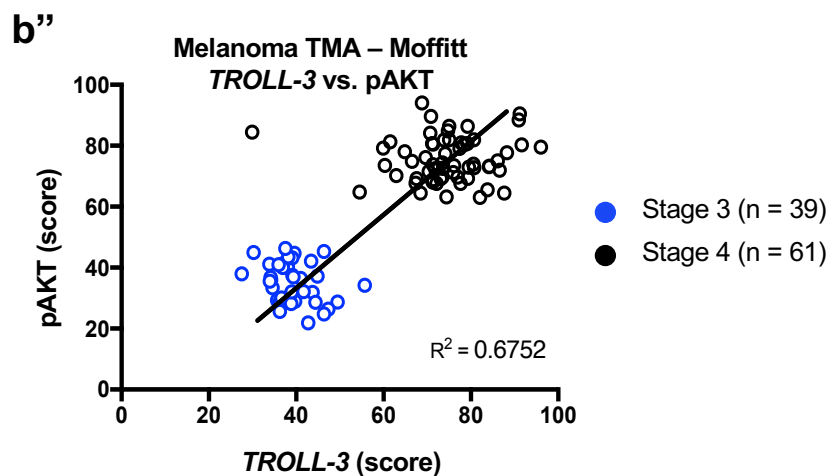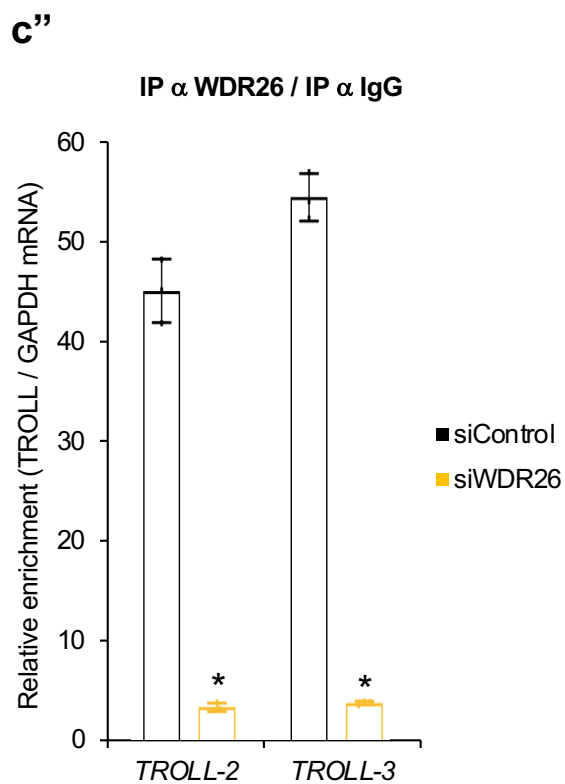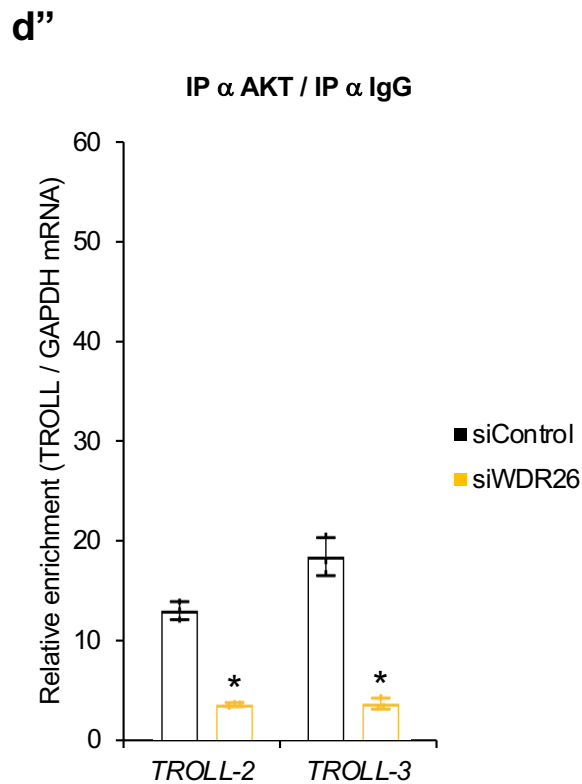

**e''** 1 *TROLL-2* (NR\_026825.2) 1144

1 2 3 4 5 6 7 8 9 10 11

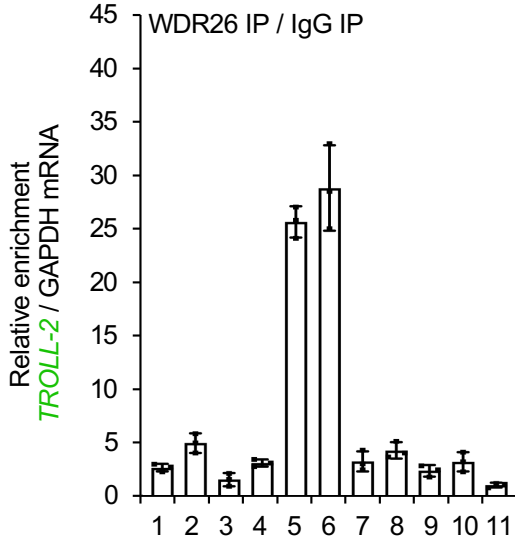

**f''** 1 *TROLL-3* (NR\_034110.1) 2195

1 2 3 4 5 6 7 8 9 10 11 12 13 14 15 16 17 18 19 20 21 22

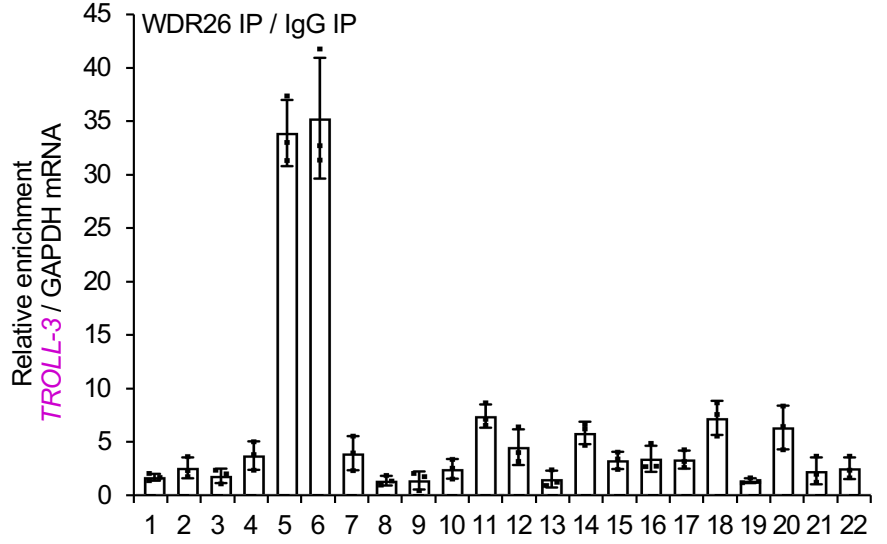

**g''** TROLL-2 TROLL-2  $\Delta$ 522-538 TROLL-3 TROLL-3  $\Delta$ 467-482

5% input sense antisense sense antisense sense antisense sense antisense

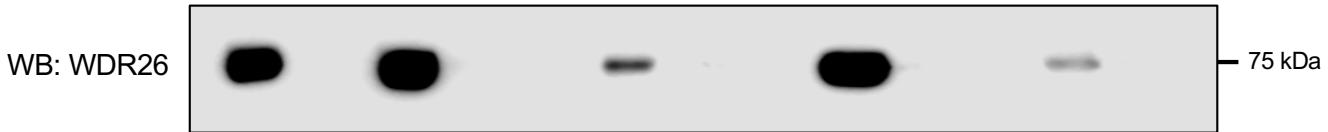

**h''**

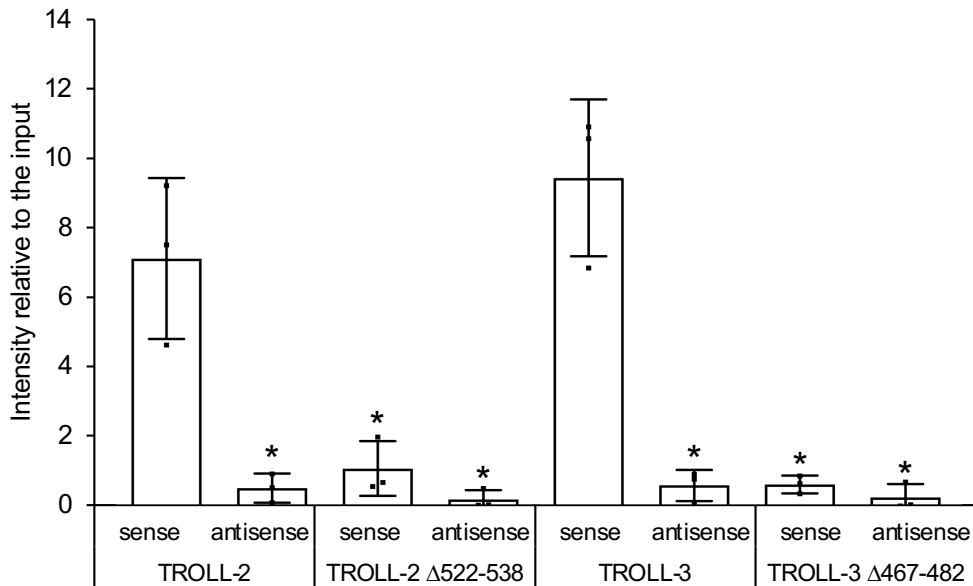

i''

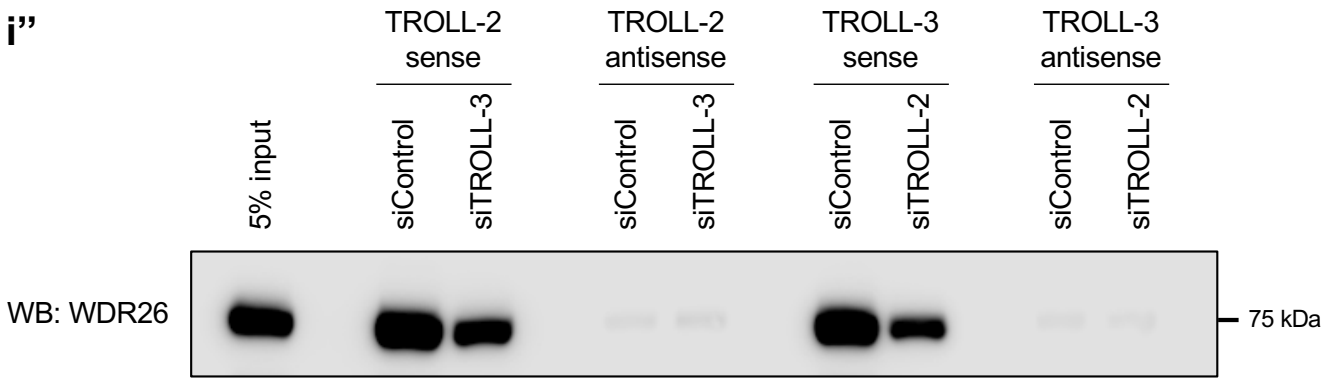

j''

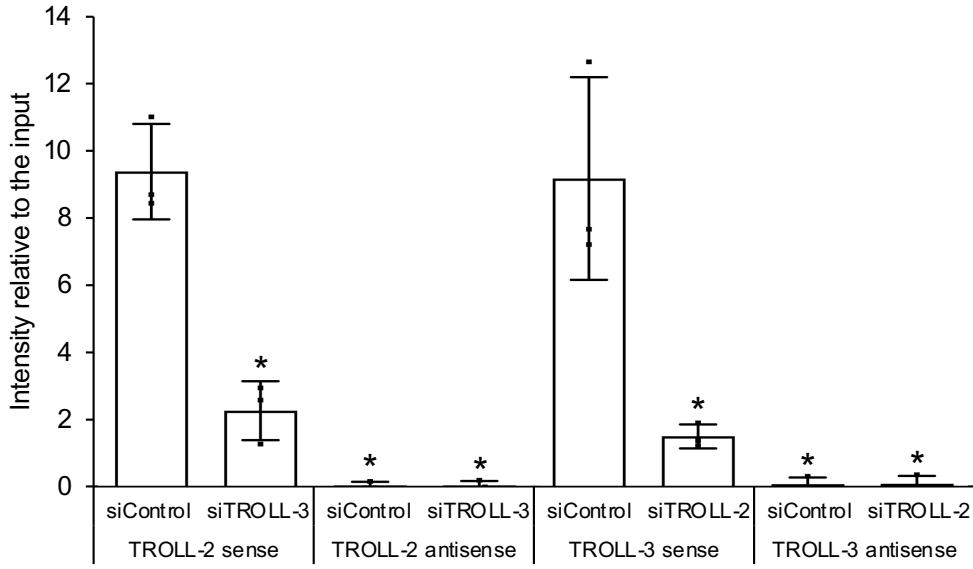

k''

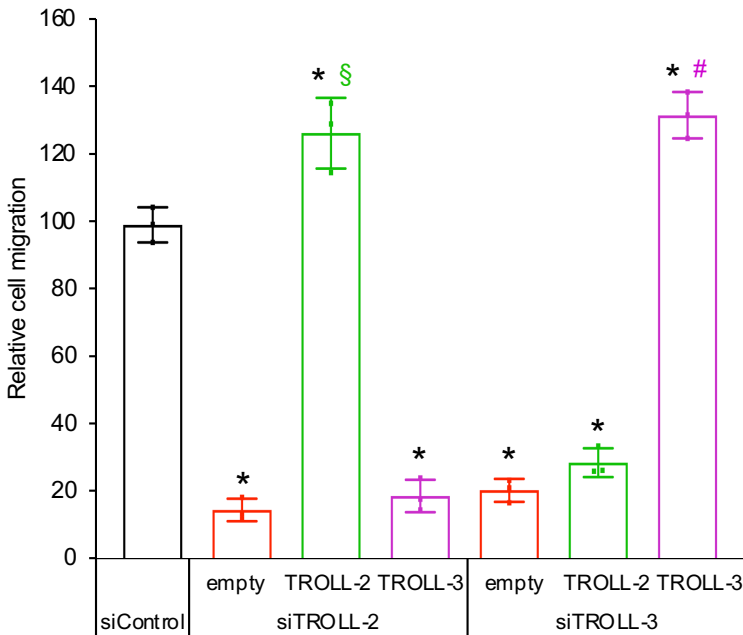

l''

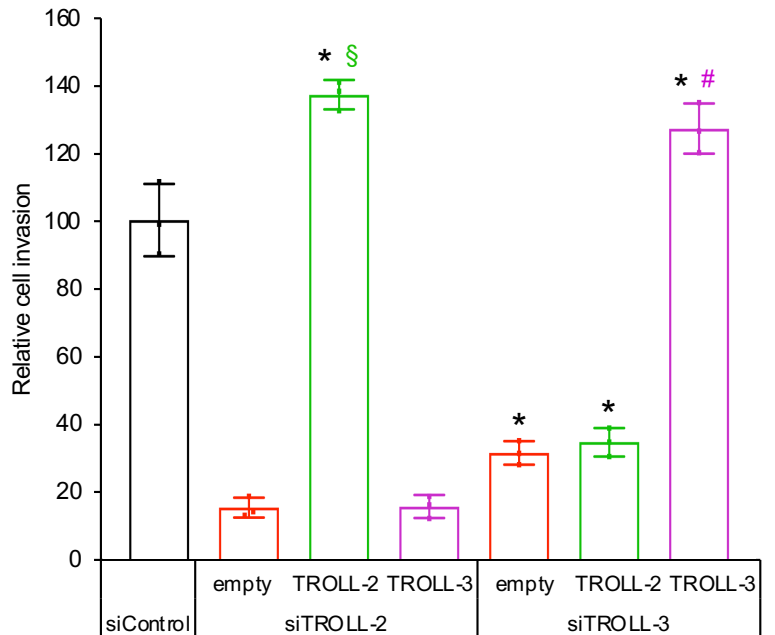

**Supplementary Fig. 6** AKT phosphorylation mediates *TROLL-2* and *TROLL-3*'s functions. **a,b** Representative western blot (**a**) and quantification of the percentage (**b**) of WDR26 localization in the nuclei (Nuc) and cytosols (Cyt) of the indicated cell lines. Data are mean  $\pm$  SD and analysed with two-way ANOVA.  $n = 3$  biological replicates, \* vs. MCF10A,  $P < 0.05$ . § vs. DCIS,  $P < 0.005$ . **c** Representative western blot of WDR26 localization in the nuclear (Nuc) and cytoplasmic (Cyt) fractions of CA1D cells transfected with the indicated siRNAs. **d** Representative western blot of WDR26 localization in fractionated CA1D cells transfected with the indicated constructs. **e** Representative western blot analysis of the coimmunoprecipitation of endogenous NOLC1 and WDR26 in CA1D cells transfected with the indicated constructs and siRNAs. **f-h** Quantification for EdU incorporation (**f**), annexin V positivity (**g**), and cell invasion (**h**) of CA1D cells overexpressing either *TROLL-2*, *TROLL-3*, or the empty vector as a negative control, in combination with the indicated WDR26 constructs and transfected with the indicated siRNAs. Data are mean  $\pm$  SD and analysed with two-tailed Student's *t* test,  $n = 3$  biological replicates, \* vs. pBabe Empty siControl,  $P < 0.005$ . § vs. pBabe *TROLL-2* siControl,  $P < 0.005$ . # vs. pBabe *TROLL-3* siControl,  $P < 0.005$ . **i,j** qRT-PCR for *TROLL-2* (**i**) and *TROLL-3* (**j**) of the CA1D cells treated as in (**f-h**). Data are mean  $\pm$  SD and analysed with two-tailed Student's *t* test,  $n = 3$ , \* vs. pBabe Empty siControl,  $P < 0.005$ . **k** Representative western blot of WDR26 and FLAG in the CA1D cells treated as in (**f-h**). **l,m** Representative western blot (**l**) and quantification of the ratio between pAKT (S473) and total AKT in western blots of LPA-treated CA1D cells transfected with the indicated siRNAs and WDR26 constructs. Data are mean  $\pm$  SD and analysed with two-tailed Student's *t* test,  $n = 3$  biological replicates, \* vs. siControl – LPA treatment,  $P < 0.005$ . **n,o** Quantification of cell migration (**n**) and invasion (**o**) of CA1D cells overexpressing either *TROLL-2*, *TROLL-3*, or the empty vector, and treated with either MK-2206 or DMSO. Data are mean  $\pm$  SD and analysed with two-tailed Student's *t* test,  $n = 3$  biological replicates, \* vs. pBabe Empty siControl,  $P < 0.005$ . **p,q** qRT-PCR for *TROLL-2* (**p**) and *TROLL-3* (**q**) in CA1D cells treated as in (**n,o**). Data are mean  $\pm$  SD and analysed with two-tailed Student's *t* test,  $n = 3$ , \* vs. pBabe Empty siControl,  $P < 0.005$ . **r** Representative western blot of the indicated proteins in the CA1D cells treated as in (**n,o**). **s** Quantification of the IHC scores of pAKT in the indicated TMA. Data were analysed with two-way ANOVA. \* vs. normal breast tissue,  $P < 0.005$ . § vs. lobular hyperplasia,  $P < 0.005$ . # vs. ductal carcinoma in situ,  $P < 0.005$ . **t-v** Correlation of the IHC score of pAKT with the IHC score and cellular distribution of WDR26 (**t**), and with the ISH score of *TROLL-2* (**u**) and *TROLL-3* (**v**) in the indicated TMA. **w** Quantification of the IHC scores of pAKT in the indicated TMA. Data were analysed with two-way ANOVA. ¶ vs. grade 1,  $P < 0.005$ . † vs. grade 2,  $P < 0.005$ . **x-z** Correlation of the IHC score of pAKT with the IHC score and cellular distribution of WDR26 (**x**), and with the ISH score of *TROLL-2* (**y**) and *TROLL-3* (**z**) in the indicated TMA. **a'** Quantification of the IHC scores of pAKT in the indicated TMA. \* vs. TNBC,  $P < 0.005$ , Welch's *t* test. **b'-d'** Correlation of the IHC score of pAKT with the IHC score and cellular distribution of WDR26 (**b'**), and with the ISH score of *TROLL-2* (**c'**) and *TROLL-3* (**d'**) in the indicated TMA, based on tumour grade and *PTEN* levels. **e'** Quantification of the IHC score of pAKT in the indicated TMA. Data were analysed with two-way ANOVA. \* vs. normal ovarian tissue,  $P < 0.005$ . § vs. serous adenocarcinoma,  $P < 0.005$ . **f'-h'** Correlation of the IHC score of pAKT with the IHC score and cellular distribution of WDR26 (**f'**), and with the ISH score of *TROLL-2* (**g'**) and *TROLL-3* (**h'**) in the indicated TMA. **i'** Quantification of the IHC score of pAKT in the indicated TMA. Data were analysed with two-way ANOVA. \* vs. normal colon tissue,  $P < 0.005$ . § vs. polyp,  $P < 0.005$ . # vs. adenoma,  $P < 0.005$ . **j'-l'** Correlation of the IHC score of pAKT with the IHC score and cellular distribution of WDR26 (**j'**), and with the ISH score of *TROLL-2* (**k'**) and *TROLL-3* (**l'**) in the indicated TMA. **m'** Quantification of the IHC score of pAKT in the indicated TMA. Data were analysed with two-way ANOVA. \* vs. normal lung tissue,  $P < 0.005$ . § vs. benign lesion,  $P < 0.005$ . **n'-p'** Correlation of the IHC score of pAKT with the IHC score and cellular distribution of WDR26 (**n'**), and with the ISH score of *TROLL-2* (**o'**) and *TROLL-3* (**p'**) in the indicated TMA. **q'** Quantification of the IHC score of pAKT in the indicated TMA. Data were analysed with two-way ANOVA. \* vs. normal lung tissue,  $P < 0.005$ . § vs. benign lesion,  $P < 0.005$ . # vs. squamous cell carcinoma,  $P < 0.005$ . **r'-t'** Correlation of the IHC score of pAKT with the IHC score and cellular distribution of WDR26 (**r'**), and with the ISH score of *TROLL-2* (**s'**) and *TROLL-3* (**t'**) in the indicated TMA. **u'** Quantification of the IHC score of pAKT in the indicated TMA. Data were analysed with two-way ANOVA. \* vs. benign nevus,  $P < 0.005$ . **v'-x'** Correlation of the IHC score of pAKT with the IHC score and cellular distribution of WDR26 (**v'**), and with the ISH score of *TROLL-2* (**w'**) and *TROLL-3* (**x'**) in the indicated melanoma TMA. **y'** Quantification of the IHC score of pAKT in the indicated TMA. Data were analysed with two-way ANOVA. \* vs. control cases,  $P < 0.005$ . **z'-b''** Correlation of the IHC score of pAKT with the IHC score and cellular distribution of WDR26 (**z'**), and with the ISH score of *TROLL-2* (**a''**) and *TROLL-3* (**b''**) in the indicated TMA. **c'',d''** qRT-PCR of the indicated lncRNAs in the RNase-free CLIP-ed RNA interacting with endogenous WDR6 (**c''**) and AKT (**d''**) immunoprecipitated from CA1D cells transfected with the indicated siRNAs. Data are mean  $\pm$  SD,  $n = 3$  biological replicates, \* vs. siControl,  $P < 0.005$ , two-tailed Student's *t* test. **e'',f''** qRT-PCR of the indicated regions of *TROLL-2* (**e''**) and *TROLL-3* (**f''**) in the RNase-treated CLIP-ed RNA interacting with endogenous WDR6 immunoprecipitated from CA1D cells. Data are mean  $\pm$  SD,  $n = 3$  biological replicates. **g'',h''** Representative western blot (**g''**) and quantification (**h''**) of endogenous WDR26 pulled down from CA1D cells by the indicated lncRNAs. Data are mean  $\pm$  SD,  $n = 3$  biological replicates, \* vs. the sense strand of the respective full-length lncRNA,  $P < 0.005$ , two-tailed Student's *t* test. **i'',j''** Representative western blot (**i''**) and quantification (**j''**) of endogenous WDR26 pulled down from CA1D cells by the indicated lncRNAs. Data are mean  $\pm$  SD,  $n = 3$  biological replicates, \* vs. the sense strand of the respective full-length lncRNA,  $P < 0.005$ , two-tailed Student's *t* test. **k'',l''** Quantification of cell migration (**k''**) and invasion (**l''**) of CA1D cells overexpressing either *TROLL-2*, *TROLL-3*, or the empty vector, and transfected with the indicated siRNAs. Data are mean  $\pm$  SD and analysed with two-tailed Student's *t* test,  $n = 3$  biological replicates, \* vs. pBabe Empty siControl,  $P < 0.005$ . § vs. pBabe *TROLL-2* siControl,  $P < 0.005$ . # vs. pBabe *TROLL-3* siControl,  $P < 0.005$ . Graphs represent the individual data points, mean  $\pm$  SD of 3 independent experiments. Boxplots represent the individual data points, median and whiskers (min to max method). All blots are representative of  $n = 3$  biological replicates. Source data are provided as Source data file.

## SUPPLEMENTARY TABLES

**Supplementary Table 1** Gene expression qRT-PCR primers (Applied Biosystem).

| Species | Gene Name                          | TaqMan Assay ID |
|---------|------------------------------------|-----------------|
| Mouse   | TROLL-1 <sub>(RP23-168E14.4)</sub> | Mm01219093_m1   |
| Mouse   | TROLL-2 <sub>(1700006J14Rik)</sub> | Mm01164814_m1   |
| Mouse   | TROLL-3 <sub>(E130307A14Rik)</sub> | Mm04237550_m1   |
| Mouse   | TROLL-4 <sub>(2610307P16Rik)</sub> | Mm01129970_m1   |
| Mouse   | TROLL-5 <sub>(AC122821.1)</sub>    | Mm00467926_m1   |
| Mouse   | TROLL-6 <sub>(2410006H16Rik)</sub> | Mm01331817_g1   |
| Mouse   | TROLL-7 <sub>(Malat1)</sub>        | Mm01227912_s1   |
| Mouse   | TROLL-8 <sub>(AC157572.1)</sub>    | Mm01731578_gH   |
| Mouse   | TROLL-9 <sub>(4930481B07)</sub>    | Mm01257798_g1   |
| Mouse   | GAPDH                              | Mm99999915_g1   |
| Human   | TROLL-1 <sub>(RP11-98G7.1)</sub>   | Hs00418864_m1   |
| Human   | TROLL-2 <sub>(RPSAP52)</sub>       | Hs03677485_m1   |
| Human   | TROLL-3 <sub>(TRAF3IP2-AS1)</sub>  | Hs04274045_m1   |
| Human   | TROLL-4 <sub>(NR_015410)</sub>     | Hs01371948_m1   |
| Human   | TROLL-5 <sub>(LINC00514)</sub>     | Hs04273767_g1   |
| Human   | TROLL-6 <sub>(RP11-138I1.3)</sub>  | Hs00415106_m1   |
| Human   | TROLL-7 <sub>(MALAT1)</sub>        | Hs00273907_s1   |
| Human   | TROLL-8 <sub>(AL161668.12)</sub>   | Hs00922963_s1   |
| Human   | TROLL-9 <sub>(RP11-126K1.6)</sub>  | Hs04937869_g1   |
| Human   | TAp63                              | Hs00186613_m1   |
| Human   | IFIT1                              | Hs03027069_s1   |
| Human   | ITG3BP                             | Hs00183924_m1   |
| Human   | KCTD7                              | Hs00399233_m1   |
| Human   | MAD2L2                             | Hs01057448_m1   |
| Human   | NCOA5                              | Hs01001913_m1   |
| Human   | TERB2                              | Hs01014975_m1   |
| Human   | WDR26                              | Hs01553459_m1   |
| Human   | POLR2A                             | Hs00172187_m1   |

**Supplementary Table 2** Sequences of siRNA pools.

| Species | Gene Name                         | Sequence (Sense, 5'-3') |
|---------|-----------------------------------|-------------------------|
| Human   | TROLL-1 <sub>(RP11-98G7.1)</sub>  | GUAACUGAAAGUUACUUA      |
|         |                                   | UCAAUAAUCUCCAUGUUAG     |
|         |                                   | CUCACAAGAAGGCUUCAU      |
| Human   | TROLL-2 <sub>(RPSAP52)</sub>      | CACUGUUACUCAGCCUGAA     |
|         |                                   | GAAGGAAUUUCAGGGUAAA     |
|         |                                   | CCUGGAACCUUCCUAACCA     |
| Human   | TROLL-3 <sub>(TRAF3IP2-AS1)</sub> | GAGCAUCAUUUAGAAGAGG     |
|         |                                   | GCUGGUCACAAACUCCUG      |
|         |                                   | GCTATGCAGGATTGGCAGG     |
| Human   | TROLL-4 <sub>(NR_015410)</sub>    | GAAGUACCCUCAGGUGACU     |
|         |                                   | CAUCUAGAAAGCAUCAUGA     |
|         |                                   | GACUUGAGGGUCAACUUA      |
| Human   | TROLL-5 <sub>(LINC00514)</sub>    | CACACUCUGGGUCCCAACA     |
|         |                                   | CCUCUACCCUCCUGUGACA     |
|         |                                   | CUGUGUCUGCCCUCAAACA     |
| Human   | TROLL-6 <sub>(RP11-138I1.3)</sub> | CAUAUCAAUUUAACUUCA      |
|         |                                   | GGACUACAAAUCUUAUUUA     |
|         |                                   | GUUGUAAUCUCCAUUUCAG     |
| Human   | TROLL-7 <sub>(MALAT1)</sub>       | GAAUUCGGUGAUGCGAGU      |
|         |                                   | CUAACGAUUUGGUGGUGAA     |
|         |                                   | GUAAAGCCCUGAACUAUCA     |
| Human   | TROLL-8 <sub>(AL161668.12)</sub>  | CAUCCAUAAGAAGGCAUA      |
|         |                                   | CCACUUAUUGGCCCUCAUU     |
|         |                                   | GACUUGUUCUGUCGCUUCU     |
| Human   | TROLL-9 <sub>(RP11-126K1.6)</sub> | AGUUUAGUCUACGGUCCUC     |
|         |                                   | UGGAUGAUAAAUAACUAG      |
|         |                                   | CUUUUUCUGCUCUCCUCCC     |



**Supplementary Table 3** List of primers for ChIP assay.

| Promoter                          | Binding Site                  | Primers (5'-3')                     |
|-----------------------------------|-------------------------------|-------------------------------------|
| TROLL-1 <sub>(RP11-98G7.1)</sub>  | TAp63 BS (-2238 to -2213)     | Forward: CAGAGTGCACTTTTCACATGC      |
|                                   |                               | Reverse: TGCACTGCCTTGTCCATGTT       |
|                                   | non-specific (-914 to -936)   | Forward: GTAGTGACACAGGCGAGGAC       |
|                                   |                               | Reverse: CACGTGCCCCATAAAAGCTG       |
| TROLL-2 <sub>(RPSAP52)</sub>      | TAp63 BS (-4269 to -4240)     | Forward:<br>TGCAAGGGTTCAAAGAGGAAACT |
|                                   |                               | Reverse: ATGAGTTGCCAATGCATAGCC      |
|                                   | non-specific (-297 to -273)   | Forward: TGAAAAGCAAACCACATTTTCGAG   |
|                                   |                               | Reverse: ACAGATCTAGGAAGCAAAGTGC     |
| TROLL-3 <sub>(TRAF3IP2-AS1)</sub> | TAp63 BS (-3825 to -3800)     | Forward: TGTCGCCCAGGCTGGTCTCC       |
|                                   |                               | Reverse: TCTTAAGTTGGTGAATTTG        |
|                                   | non-specific (-741 to -716)   | Forward: GGGCTGGCCATGTAGTAGTC       |
|                                   |                               | Reverse: CTCCTCGAGGTGCCTCTGT        |
| TROLL-4 <sub>(NR_015410)</sub>    | TAp63 BS (-4919 to -4898)     | Forward: ACTCAGTTTGGTATCCAGGG       |
|                                   |                               | Reverse: TGTTTGTCTCTTCCAGGTGG       |
|                                   | non-specific (-1101 to -1079) | Forward: TGCTATGGCCCGAAGTTGGG       |
|                                   |                               | Reverse: CAGGAACAGCTCCCGACC         |
| TROLL-5 <sub>(LINC00514)</sub>    | TAp63 BS (-2320 to -2297)     | Forward: CTGTGTGAATCCAGCACCC        |
|                                   |                               | Reverse: AGCTGGGACGGTCCATTC         |
|                                   | non-specific (-428 to -406)   | Forward: GAGAATTCAGACAGTGAGG        |
|                                   |                               | Reverse: TGCGGAAGCAAGACAGTGC        |
| TROLL-6 <sub>(RP11-138I1.3)</sub> | TAp63 BS (-2287 to -2264)     | Forward: GCTGGCCTCCAGGATCGC         |
|                                   |                               | Reverse: CCTGTAAACAGATGGCAAGC       |
|                                   | non-specific (-683 to -658)   | Forward: AGGTCTTATGATTGTCTTCCC      |
|                                   |                               | Reverse: CCTTTCAGCCTATGAACATGC      |

|                                   |                               |                                 |
|-----------------------------------|-------------------------------|---------------------------------|
| TROLL-7 <sub>(MALAT1)</sub>       | TAp63 BS (-3874 to -3851)     | Forward: GCACTCTAGCCTGGGTGAC    |
|                                   |                               | Reverse: TCTTCATGGCACCTGGATTCC  |
|                                   | non-specific (-695 to -674)   | Forward: ACAGCGTCACTAATCTCTCC   |
|                                   |                               | Reverse: CCTAAAATGGAGAGTTCCAGG  |
| TROLL-8 <sub>(AL161668.12)</sub>  | TAp63 BS (-2034 to -2013)     | Forward: CTGCCTGATCTCCATGTAGC   |
|                                   |                               | Reverse: CACTGTAGTTGAGAAAATGAGC |
|                                   | non-specific (-3379 to -3359) | Forward: TGAAGAGAATGAGAAAATGTGG |
|                                   |                               | Reverse: CAAAGTGCTAGGATTACAGGC  |
| TROLL-9 <sub>(RP11-126K1.6)</sub> | TAp63 BS (-3278 to -3254)     | Forward: CTGAAAGTGGCTCAGGGTTG   |
|                                   |                               | Reverse: GAGCGGATCCTGAAACGGT    |
|                                   | non-specific (-330 to -309)   | Forward: TCCATTCTATCTGCCCCACCT  |
|                                   |                               | Reverse: TTGTTTTTGAGGGGGAGGAGG  |

**Supplementary Table 4** List of human cancer tissue microarrays (TMAs).

| TMA Name                               | TMA ID and Source                    | Pathology Diagnosis                                                                                                                  |
|----------------------------------------|--------------------------------------|--------------------------------------------------------------------------------------------------------------------------------------|
| Breast cancer progression TMA – Biomax | BR480a (US Biomax)                   | Normal breast tissue (n = 2)<br>Lobular hyperplasia (n = 10)<br>Ductal carcinoma in situ (n = 11)<br>Invasive breast cancer (n = 22) |
| Invasive breast cancer TMA – Biomax    | BR20837a (US Biomax)                 | Grade 1 (n = 4)<br>Grade 2 (n = 34)<br>Grade 3 (n = 39)                                                                              |
| Invasive breast cancer TMA – Dundee    | Breast TMA (26), Tayside Tissue Bank | Grade 1 (n = 18)<br>Grade 2 (n = 58)<br>Grade 3 (n = 79)                                                                             |
| Invasive breast cancer TMA – Moffitt   | TMA-5, Moffitt Cancer Center         | Triple negative breast cancer (TNBC) (n = 43)<br>Non-TNBC (n = 25)                                                                   |
| Colon cancer TMA                       | CO961 (US Biomax)                    | Normal colon tissue (n = 1)<br>Polyp (n = 5)<br>Adenoma (n = 6)<br>Adenocarcinoma (n = 61)                                           |
| Lung adenocarcinoma TMA                | BC04002a (US Biomax)                 | Normal lung tissue (n = 2)<br>Benign lesion (n = 9)<br>Adenocarcinoma (LUAD) (n = 16)                                                |
| Lung squamous cell carcinoma TMA       | BC04002a (US Biomax)                 | Normal lung tissue (n = 2)<br>Benign lesion (n = 9)<br>Squamous cell carcinoma (LUSC) (n = 18)<br>Metastatic LUSC (n = 10)           |
| Melanoma TMA – Biomax                  | ME1004 (US Biomax)                   | Benign nevus (n = 16)<br>Stage 1 (n = 3)<br>Stage 2 (n = 30)<br>Stage 3 (n = 12)<br>Stage 4 (n = 1)<br>Unknown stage (n = 31)        |
| Melanoma TMA – Moffitt                 | TMA-4, Moffitt Cancer Center         | Control case (n = 6)<br>Stage 3 (n = 39)<br>Stage 4 (n = 61)                                                                         |
| Ovarian cancer – Biomax                | OV1005b (US Biomax)                  | Normal ovary (n = 6)<br>Serous adenocarcinoma (n = 32)<br>Non-Serous adenocarcinoma (n = 13)                                         |

**Supplementary Table 5** List of List of primers for CLIP-qPCR assay.

| Name                              | Primers (5'-3')                    |
|-----------------------------------|------------------------------------|
| TROLL-2 segment 1 (5 to 127)      | Forward: CCCATTTAGAGAATTCGGGAAG    |
|                                   | Reverse: AGTTAAGGCAGAGTTCACAAAG    |
| TROLL-2 segment 2 (116 to 208)    | Forward: TCTGCCTTAACTCAAAGATTCC    |
|                                   | Reverse: CATCCTCCTCCTTCATTTGC      |
| TROLL-2 segment 3 (189 to 317)    | Forward: GCAAATGAAGGAGGAGGATG      |
|                                   | Reverse: TCAGATTTATGCTGTAGATGCC    |
| TROLL-2 segment 4 (303 to 403)    | Forward: ACAGCATAAATCTGAAGAGGAC    |
|                                   | Reverse: CCTGGAGGATATGACTACTGAC    |
| TROLL-2 segment 5 (382 to 540)    | Forward: TGTCAGTGT CATATCCTCCAG    |
|                                   | Reverse: GTCAGAAACCACAAGAAGCC      |
| TROLL-2 segment 6 (489 to 636)    | Forward: TAACCAGATCCAGGCAGCCTAC    |
|                                   | Reverse: TGTCCAATGGCACAGAGGAG      |
| TROLL-2 segment 7 (627 to 738)    | Forward: CCATTGGACATTGCCATCAC      |
|                                   | Reverse: TGTTGCAGGAAATGGTGC        |
| TROLL-2 segment 8 (722 to 864)    | Forward: CACCATTTCTGCAACACC        |
|                                   | Reverse: GCTGAAACAGTCCATTTACCC     |
| TROLL-2 segment 9 (807 to 944)    | Forward: CTGCTGCTGAAAAGGCTGTGAC    |
|                                   | Reverse: ACTGCTGAATAGGCACAGAGGG    |
| TROLL-2 segment 10 (929 to 1058)  | Forward: GTGCCTATTCAGCAGTTTCTAC    |
|                                   | Reverse: TGCAAGAACAGCTTAAGACC      |
| TROLL-2 segment 11 (1038 to 1108) | Forward: TGGTCTTAAGCTGTTCTTGAC     |
|                                   | Reverse: ACTGATGTTTATTTTCTGTCAACCT |
| TROLL-3 segment 1 (7 to 117)      | Forward: GCTTGCGGGAGGGGGGC         |
|                                   | Reverse: CTGCTGGATGTGAAATGGCG      |
| TROLL-3 segment 2 (96 to 195)     | Forward: ACCGCCATTTACATCCAG        |
|                                   | Reverse: TGGGCAATATAGTGAGACCTC     |
| TROLL-3 segment 3 (187 to 292)    | Forward: TATTGCCCAAGCTGGTCTC       |
|                                   | Reverse: ATAATTTTCGAGGGCATGG       |
| TROLL-3 segment 4 (255 to 360)    | Forward: AGATAACAGGTATGAGCCACC     |
|                                   | Reverse: GCAGTGAGTTGAGATTGGG       |
| TROLL-3 segment 5 (342 to 489)    | Forward: CCCAATCTCAACTCACTGC       |
|                                   | Reverse: GGGCAATATAGTGAAACCCTG     |
| TROLL-3 segment 6 (472 to 621)    | Forward: GGTTTCACTATATTGCCCAGG     |

|                                   |                                        |
|-----------------------------------|----------------------------------------|
|                                   | Reverse: AAGGAAAGAAAAGGGATGACAC        |
| TROLL-3 segment 7 (603 to 749)    | Forward: TCATCCCTTTTCTTTCCTTCAC        |
|                                   | Reverse: AATGCCTCCAGATATTTTGCC         |
| TROLL-3 segment 8 (727 to 837)    | Forward: TTGGCAAATATCTGGAGGC           |
|                                   | Reverse: TTCAACACCTGCACTATTGAC         |
| TROLL-3 segment 9 (805 to 943)    | Forward: CAGGTCCAAAGTGTCAATAGTG        |
|                                   | Reverse: AAATGCCTCTGAAAGGGAATG         |
| TROLL-3 segment 10 (884 to 1029)  | Forward: AGTCTCTTGCCTTTATGAAACC        |
|                                   | Reverse: GCAGAAACCTGCATATAAAGCC        |
| TROLL-3 segment 11 (972 to 1071)  | Forward: TGGAGTCAATTGCATCAACC          |
|                                   | Reverse: TATGTGCCTACCTTGTACCC          |
| TROLL-3 segment 12 (1051 to 1185) | Forward: TGGGTACAAGGTAGGCACAT          |
|                                   | Reverse: GGAAATTCATCTCTCACCACATGA      |
| TROLL-3 segment 13 (1168 to 1284) | Forward: GGTGAGAGATGAATTTCTGAACA       |
|                                   | Reverse: TGCTAACTTATGGAAGTGGAAGTT      |
| TROLL-3 segment 14 (1261 to 1412) | Forward: ACTTCCACTTCCATAAGTTAGCAG      |
|                                   | Reverse: AATGAGGGTCCTGGAAAGCTC         |
| TROLL-3 segment 15 (1391 to 1496) | Forward: TGAGCTTTCCAGGACCCTCATT        |
|                                   | Reverse: TCTATGTGTGTTTGGTCTCCTCC       |
| TROLL-3 segment 16 (1475 to 1603) | Forward:<br>GAGGAGACCAAACACACATAGAGT   |
|                                   | Reverse: TTTGGGGCCAGGGGAAACTAC         |
| TROLL-3 segment 17 (1592 to 1666) | Forward: CCTGGCCCCAAAGTTTATTGC         |
|                                   | Reverse:<br>AGCTTTTATAGTGGGAGTTTTTCTGG |
| TROLL-3 segment 18 (1637 to 1747) | Forward: ACATTCCAGAAAACTCCCAC          |
|                                   | Reverse: GGGCTCAAGCAATAATCTCAC         |
| TROLL-3 segment 19 (1742 to 1841) | Forward: GAGCCCAGAAGTTTGAGACC          |
|                                   | Reverse: GGGACTACAGGCATACATCAC         |
| TROLL-3 segment 20 (1819 to 1966) | Forward: TGGTGATGTATGCCTGTAGTC         |
|                                   | Reverse: TGTGTGTTTTTTGAGACAGGG         |
| TROLL-3 segment 21 (1906 to 2045) | Forward: ATGATCACCCTGCACTCC            |
|                                   | Reverse: CTTTTCTGGCCTCTGGAATG          |
| TROLL-3 segment 22 (2025 to 2174) | Forward: TCATTCCAGAGGCCAGAAAAG         |
|                                   | Reverse: TTCTTTATTGTCCTCCATGTTTTCC     |
