# Supplementary material for: Pan-cancer analysis reveals TAp63-regulated oncogenic lncRNAs that promote cancer progression through AKT activation
Source: PubMed Central journal article supplement (PMC7561725; doi:10.1038/s41467-020-18973-w), 2020-10-14
Supplement: 41467_2020_18973_MOESM3_ESM.pdf [file 41467_2020_18973_MOESM3_ESM.pdf]

## **Description of Additional Supplementary Files**

File Name: Supplementary Data 1

Description: List of peptides interacting with WDR26 and its mutants
