# Supplementary material for: Pan-cancer analysis reveals TAp63-regulated oncogenic lncRNAs that promote cancer progression through AKT activation
Source: PubMed Central journal article supplement (PMC7561725; doi:10.1038/s41467-020-18973-w), 2020-10-14
Supplement: 41467_2020_18973_MOESM5_ESM.pdf [file 41467_2020_18973_MOESM5_ESM.pdf]

## Reporting Summary

Nature Research wishes to improve the reproducibility of the work that we publish. This form provides structure for consistency and transparency in reporting. For further information on Nature Research policies, see our [Editorial Policies](#) and the [Editorial Policy Checklist](#).

### Statistics

For all statistical analyses, confirm that the following items are present in the figure legend, table legend, main text, or Methods section.

n/a Confirmed

- The exact sample size ( $n$ ) for each experimental group/condition, given as a discrete number and unit of measurement
- A statement on whether measurements were taken from distinct samples or whether the same sample was measured repeatedly
- The statistical test(s) used AND whether they are one- or two-sided  
*Only common tests should be described solely by name; describe more complex techniques in the Methods section.*
- A description of all covariates tested
- A description of any assumptions or corrections, such as tests of normality and adjustment for multiple comparisons
- A full description of the statistical parameters including central tendency (e.g. means) or other basic estimates (e.g. regression coefficient) AND variation (e.g. standard deviation) or associated estimates of uncertainty (e.g. confidence intervals)
- For null hypothesis testing, the test statistic (e.g.  $F$ ,  $t$ ,  $r$ ) with confidence intervals, effect sizes, degrees of freedom and  $P$  value noted  
*Give  $P$  values as exact values whenever suitable.*
- For Bayesian analysis, information on the choice of priors and Markov chain Monte Carlo settings
- For hierarchical and complex designs, identification of the appropriate level for tests and full reporting of outcomes
- Estimates of effect sizes (e.g. Cohen's  $d$ , Pearson's  $r$ ), indicating how they were calculated

*Our web collection on [statistics for biologists](#) contains articles on many of the points above.*

### Software and code

Policy information about [availability of computer code](#)

Data collection Microsoft Excel v16.16.5

Data analysis GraphPad Prism v7.0d, Oncotopix Visiopharm v2018.4, Circos v0.69, TopHat v2.0.12, R v3.6.1

For manuscripts utilizing custom algorithms or software that are central to the research but not yet described in published literature, software must be made available to editors and reviewers. We strongly encourage code deposition in a community repository (e.g. GitHub). See the Nature Research [guidelines for submitting code & software](#) for further information.

### Data

Policy information about [availability of data](#)

All manuscripts must include a [data availability statement](#). This statement should provide the following information, where applicable:

- Accession codes, unique identifiers, or web links for publicly available datasets
- A list of figures that have associated raw data
- A description of any restrictions on data availability

Public available data used in this paper were obtained from UCSC (<http://genome.ucsc.edu/cgi-bin/hgGateway>) and The Cancer Genome Atlas (TCGA) breast cancer and melanoma datasets (<http://www.cancer.gov/about-nci/organization/ccg/research/structural-genomics/tcga>). The source data underlying Figs. 1a-h, 2a-d, 2f, 2h, 3b-e, 4b-f, 5a, 5c, 5e, 6a-e and Supplementary Figs. 1a-i, 2a-m, 2o, 2q, 3a-k, 4a-h, 5a-m', 5o', 5q', 5s', 5u', 5x'-a", 5c", 5e", 6a-6l" are provided as Source Data File. All the other data (imaging) supporting the findings of this study are available from the corresponding author upon reasonable request.

## Field-specific reporting

Please select the one below that is the best fit for your research. If you are not sure, read the appropriate sections before making your selection.

Life sciences  Behavioural & social sciences  Ecological, evolutionary & environmental sciences

For a reference copy of the document with all sections, see [nature.com/documents/nr-reporting-summary-flat.pdf](https://www.nature.com/documents/nr-reporting-summary-flat.pdf)

## Life sciences study design

All studies must disclose on these points even when the disclosure is negative.

|                 |                                                                                                                                                                                                                                                                                                                                         |
|-----------------|-----------------------------------------------------------------------------------------------------------------------------------------------------------------------------------------------------------------------------------------------------------------------------------------------------------------------------------------|
| Sample size     | For all the in vitro experiments, a minimum of three biological replicates were used per sample. For all the in vivo experiment, a minimum of five mice were used per each group. No statistical method was used to determine the sample/group size.                                                                                    |
| Data exclusions | None of the replicates was excluded from any of the presented data.                                                                                                                                                                                                                                                                     |
| Replication     | Experiments were successfully performed at least three times. All replication attempts were successful.                                                                                                                                                                                                                                 |
| Randomization   | Mice were randomly allocated into different experimental groups before being injected with the cell lines of interest. For experiments involving cellular and biological studies, three independent experiments have been performed, allocating randomly cells in experimental groups.                                                  |
| Blinding        | Tumour volume assessment and the quantification of lung nodules were blinded. The IHC and ISH signals and the proportion of positive tissue were measured blindly. For most of the other experiments, the results were quantified and appropriate statistical tests were performed to evaluate difference and statistical significance. |

## Reporting for specific materials, systems and methods

We require information from authors about some types of materials, experimental systems and methods used in many studies. Here, indicate whether each material, system or method listed is relevant to your study. If you are not sure if a list item applies to your research, read the appropriate section before selecting a response.

### Materials & experimental systems

| n/a                                 | Involvement in the study                                        |
|-------------------------------------|-----------------------------------------------------------------|
| <input type="checkbox"/>            | <input checked="" type="checkbox"/> Antibodies                  |
| <input type="checkbox"/>            | <input checked="" type="checkbox"/> Eukaryotic cell lines       |
| <input checked="" type="checkbox"/> | <input type="checkbox"/> Palaeontology and archaeology          |
| <input type="checkbox"/>            | <input checked="" type="checkbox"/> Animals and other organisms |
| <input checked="" type="checkbox"/> | <input type="checkbox"/> Human research participants            |
| <input checked="" type="checkbox"/> | <input type="checkbox"/> Clinical data                          |
| <input checked="" type="checkbox"/> | <input type="checkbox"/> Dual use research of concern           |

### Methods

| n/a                                 | Involvement in the study                        |
|-------------------------------------|-------------------------------------------------|
| <input checked="" type="checkbox"/> | <input type="checkbox"/> ChIP-seq               |
| <input checked="" type="checkbox"/> | <input type="checkbox"/> Flow cytometry         |
| <input checked="" type="checkbox"/> | <input type="checkbox"/> MRI-based neuroimaging |

## Antibodies

### Antibodies used

Chromatin Immunoprecipitation:  
TAp63 (sc-8608, Santa Cruz)  
Normal mouse IgG (sc-2025, Santa Cruz)  
Normal rabbit IgG (sc-2027, Santa Cruz)

Immunoprecipitation:  
AKT (9272S, Cell Signaling)  
NOLC1 (ab184550, Abcam)  
Normal rabbit IgG (sc-2027, Santa Cruz)  
WDR26 (ab203345, Abcam)

Immunohistochemistry:  
NCOA5 (ab70831, Abcam)  
WDR26 (ab203345, Abcam)  
pAKT (S473) (4060S, Cell Signaling)  
TAp63 (618902, Biolegend)

Western Blot:  
FLAG (A8592, Sigma)  
WDR26 (ab85961, Abcam)

## Validation

H3 (ab1791, Abcam)  
 HSP90 (ab13495)  
 pAKT (S473) (4060S, Cell Signaling)  
 AKT (ab8805, Abcam)  
 Actin (A5441, Sigma)  
 NOLC1 (sc-374033, Santa Cruz)

Antibody: Actin (A5441, Sigma)  
 Species reactivity: multiple species including human and mouse  
 Applications validated by manufacturer: IHC, IF, WB

Antibody: AKT (9272S, Cell Signaling)  
 Species reactivity: multiple species including human and mouse  
 Applications validated by manufacturer: IP, WB

Antibody: AKT (ab8805, Abcam)  
 Species reactivity: mouse and human  
 Applications validated by manufacturer: IHC, WB

Antibody: pAKT (S473) (4060S, Cell Signaling)  
 Species reactivity: multiple species including human and mouse  
 Applications validated by manufacturer: IHC, IP, WB

Antibody: FLAG (A8592, Sigma)  
 Species reactivity: all  
 Applications validated by manufacturer: WB

Antibody: H3 (ab1791, Abcam)  
 Species reactivity: multiple species including human and mouse  
 Applications validated by manufacturer: WB

Antibody: HSP90 (ab13495)  
 Species reactivity: mouse and human  
 Applications validated by manufacturer: WB

Antibody: NCOA5 (ab70831, Abcam)  
 Species reactivity: human  
 Applications validated by manufacturer: IHC, IP, WB

Antibody: NOLC1 (ab184550, Abcam)  
 Species reactivity: mouse and human  
 Applications validated by manufacturer: IP, WB

Antibody: NOLC1 (sc-374033, Santa Cruz)  
 Species reactivity: human  
 Applications validated by manufacturer: IP, WB

Antibody: Normal mouse IgG (sc-2025, Santa Cruz)  
 Validated by manufacturer as a negative control for IP

Antibody: Normal rabbit IgG (sc-2027, Santa Cruz)  
 Validated by manufacturer as a negative control for IP

Antibody: TAp63 (sc-8608, Santa Cruz)  
 Species reactivity: mouse and human  
 Applications validated by manufacturer: IP, WB

Antibody: TAp63 (618902, Biolegend)  
 Species reactivity: human  
 Applications validated by manufacturer: IHC, WB

Antibody: WDR26 (ab85961, Abcam)  
 Species reactivity: human  
 Applications validated by manufacturer: WB

Antibody: WDR26 (ab203345, Abcam)  
 Species reactivity: mouse and human  
 Applications validated by manufacturer: IHC, IP

## Eukaryotic cell lines

Policy information about [cell lines](#)

### Cell line source(s)

The MCF10A progression model cell lines (MCF10A, AT1, DCIS, and CA1D) were obtained from the Karmanos Cancer Center (Detroit, USA). MDA MB-231, A375, H1299, H358, and Malme-3M cells were obtained from ATCC.

Authentication

All the cell lines used were authenticated via STR loci profiling at the Molecular Genomics Core (Moffitt Cancer Center).

Mycoplasma contamination

All the cell lines used were mycoplasma negative.

Commonly misidentified lines  
(See [ICLAC](#) register)

No commonly misidentified cell lines were used.

## Animals and other organisms

Policy information about [studies involving animals](#); [ARRIVE guidelines](#) recommended for reporting animal research

Laboratory animals

All the mice used in this study were six-to-eight week old female athymic nu/nu mice.

Wild animals

The study did not involve wild animals.

Field-collected samples

The study did not involve field-collected samples.

Ethics oversight

All procedures were approved by the IACUC at the H. Lee Moffitt Cancer Center & Research Institute.

Note that full information on the approval of the study protocol must also be provided in the manuscript.
